# Supplementary material for: Caffeoylquinic acid profiling: comparative analysis in yerba mate, Indian camphorweed, and stevia extracts with emphasis on the influence of brewing conditions and cold storage in yerba mate infusion
Source: PeerJ journal article supplement (doi:10.7717/peerj.17250), 2024-05-06
Supplement: FigS1.pdf [file FigS1.pdf]

1-CQA

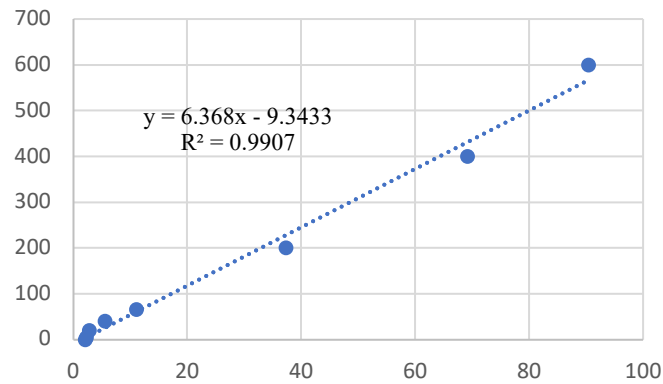

3-CQA

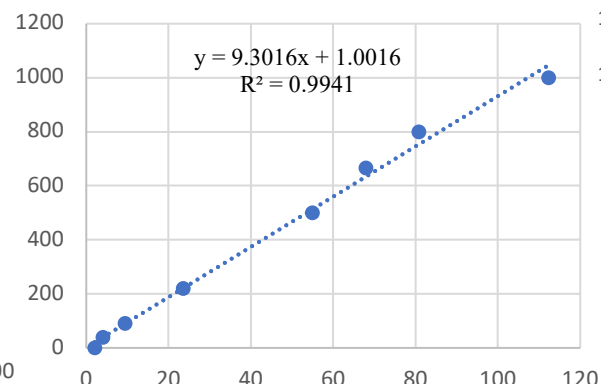

4-CQA

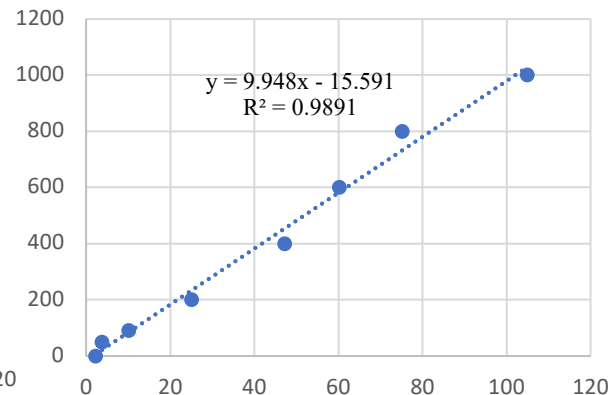

5-CQA

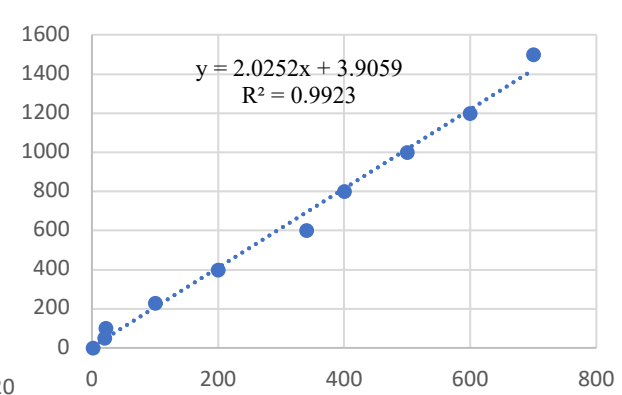

Concentration (µg/mL)

1,3-diCQA

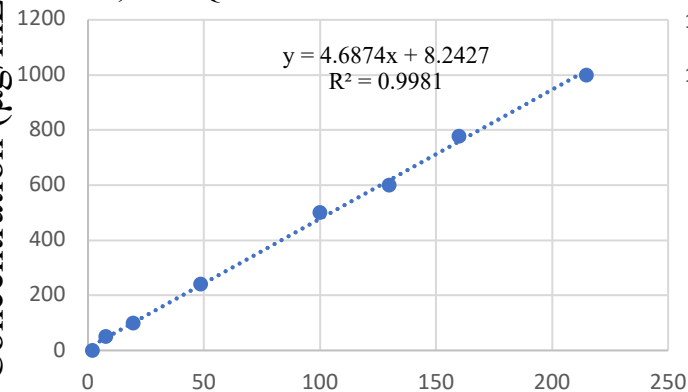

1,5-diCQA

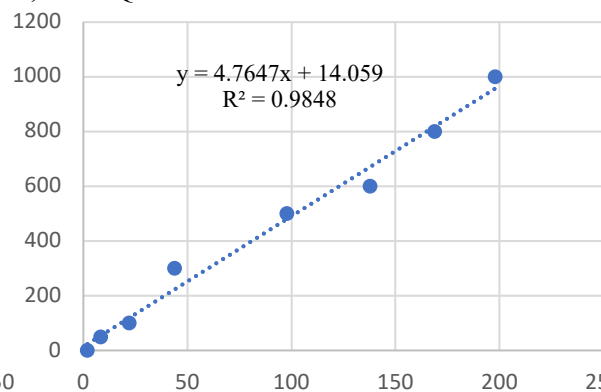

3,4-diCQA

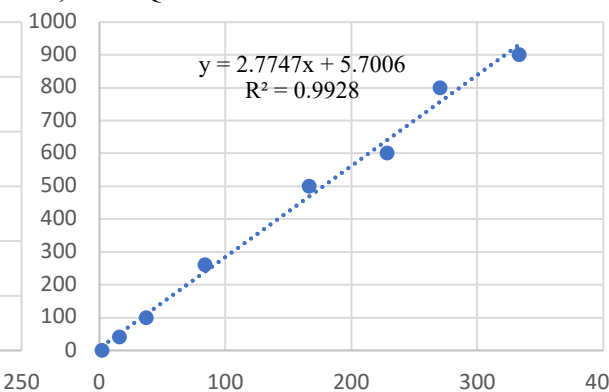

3,5-diCQA

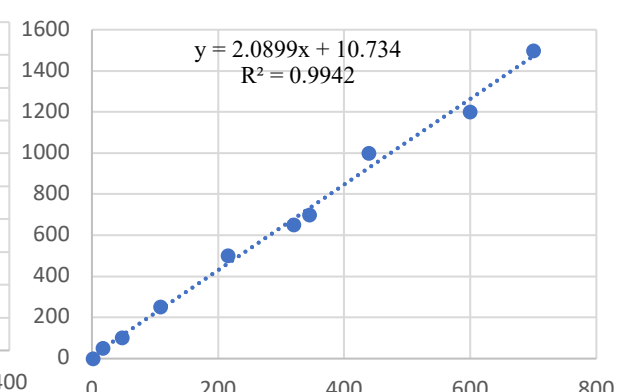

4,5-diCQA

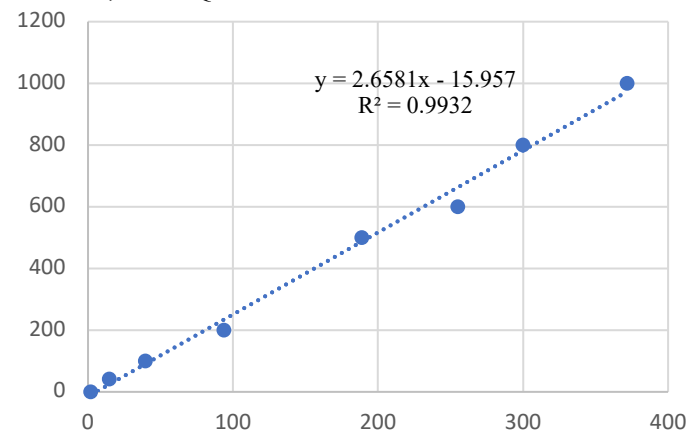

Area (mAU\*min)
