# Supplementary material for: Caffeoylquinic acid profiling: comparative analysis in yerba mate, Indian camphorweed, and stevia extracts with emphasis on the influence of brewing conditions and cold storage in yerba mate infusion
Source: PeerJ journal article supplement (doi:10.7717/peerj.17250), 2024-05-06

**A**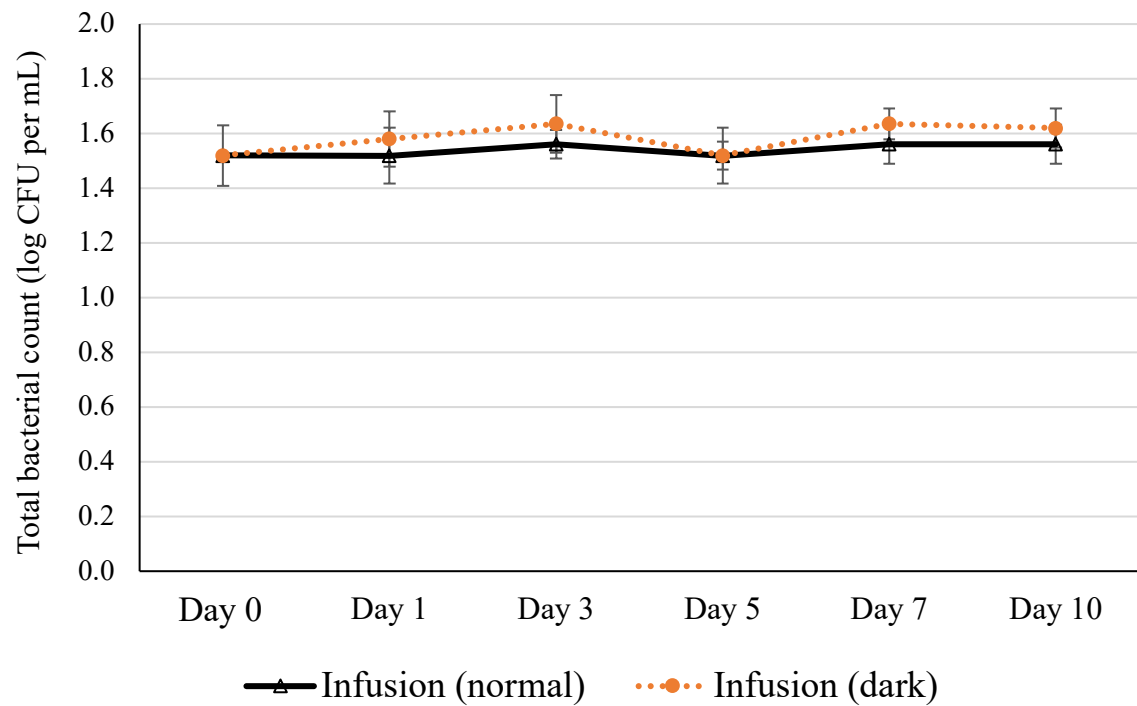**B**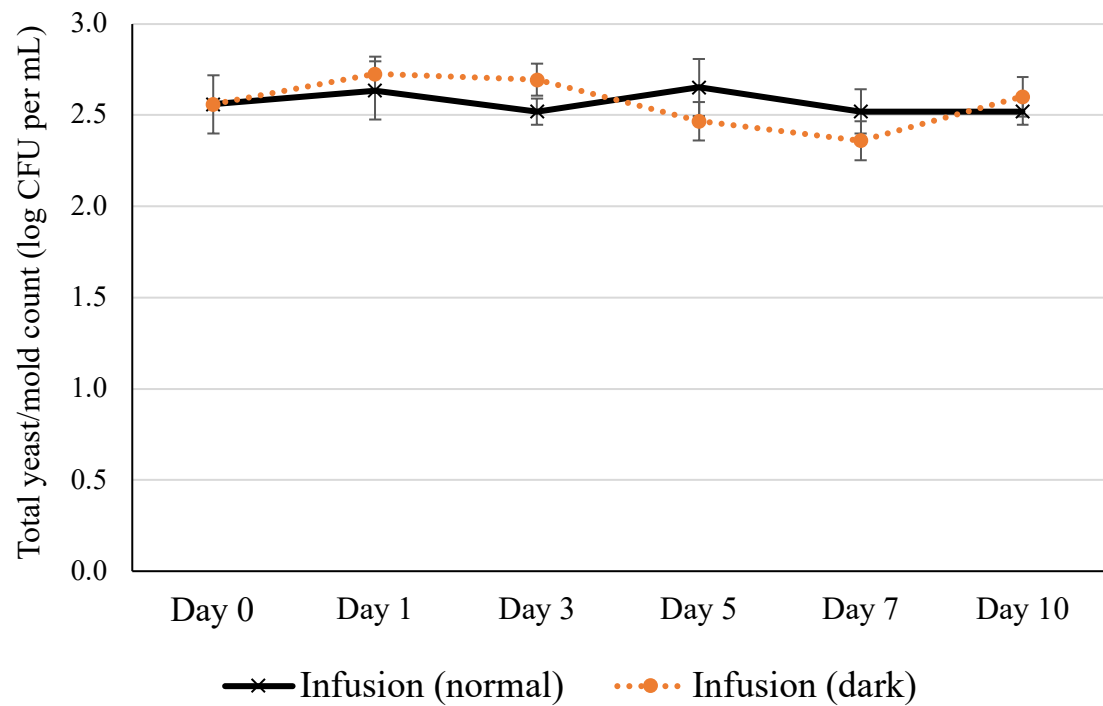

Supplement: FigS2.pdf [file FigS2.pdf]
