# Supplementary material for: Caffeoylquinic acid profiling: comparative analysis in yerba mate, Indian camphorweed, and stevia extracts with emphasis on the influence of brewing conditions and cold storage in yerba mate infusion
Source: PeerJ. 2024 May 6;12:e17250. doi: 10.7717/peerj.17250 (PMC11080990; doi:10.7717/peerj.17250)
Supplement: Supplemental Information 3 — Data are presented as the means ± standard deviations of three independent replicates. For each measured parameter, values in the same row followed by different superscript letters are significantly different (p < 0.05). [file peerj-12-17250-s003.docx]

**Supplementary Table S3.** Effect of storage under simulated home-refrigeration conditions (4 °C) on the color of yerba mate infusion.

| Sample | Fresh | Day 1 | Day 3 | Day 5 | Day 7 | Day 10 |
| --- | --- | --- | --- | --- | --- | --- |
| Lightness (*L**) | | | | | |
| Infusion (normal) | 29.22 ± 0.56a | 27.49 ± 0.87a | 29.22 ± 0.79a | 28.77 ± 0.33a | 29.49 ± 0.46a | 29.50 ± 1.01a |
| Infusion (dark) | 28.01 ± 0.6a | 27.38 ± 0.73a | 28.39 ± 0.43a | 29.46 ± 0.23a | 28.44 ± 0.4a |
| Redness/greenness (*a**) | | | | | | |
| Infusion (normal) | 3.85 ± 0.19a | 3.77 ± 0.8a | 3.68 ± 0.28a | 3.64 ± 0.52a | 3.97 ± 0.09a | 4.02 ± 0.66a |
| Infusion (dark) | 3.93 ± 0.11a | 3.92 ± 0.18a | 3.66 ± 0.79a | 3.98 ± 0.19a | 3.66 ± 0.28a |
| Yellowness/blueness (*b**) | | | | | | |
| Infusion (normal) | 2.87 ± 0.11a | 2.54 ± 0.11a | 2.97 ± 0.23a | 2.68 ± 0.11a | 2.99 ± 0.23a | 2.85 ± 0.32a |
| Infusion (dark) | 2.99 ± 0.08a | 3.01 ± 0.49a | 3.07 ± 0.88a | 2.88 ± 0.28a | 3.11 ± 0.85a |
| Color difference (Δ*E*) | | | | | | |
| Infusion (normal) |  | 0.36 ± 0.04a | 0.35 ± 0.08a | 0.34 ± 0.06a | 0.35 ± 0.06a | 0.32 ± 0.09a |
| Infusion (dark) | 0.39 ± 0.05a | 0.37 ± 0.07a | 0.35 ± 0.07a | 0.36 ± 0.04a | 0.33 ± 0.08a |

Data are presented as the means ± standard deviations of three independent replicates. For each measured parameter, values in the same row followed by different superscript letters are significantly different (*p* < 0.05).
