# Supplementary material for: Caffeoylquinic acid profiling: comparative analysis in yerba mate, Indian camphorweed, and stevia extracts with emphasis on the influence of brewing conditions and cold storage in yerba mate infusion
Source: PeerJ. 2024 May 6;12:e17250. doi: 10.7717/peerj.17250 (PMC11080990; doi:10.7717/peerj.17250)
Supplement: Supplemental Information 6 [file peerj-12-17250-s006.xlsx]

## Sheet: Yerba mate 1
	Sample Name:		Yerba mate 1			Injection Volume:		10
	Vial Number:		GD2			Channel:		UV_VIS_1
	Sample Type:		unknown			Wavelength:		320.0
	Control Program:		20200611 CQAs 1_5mlmin-1 70min			Bandwidth:		4
	Quantif. Method:		20200611 CQAs 1_5mlmin-1 70min			Dilution Factor:		1
	Recording Time:		2020-10-21 22:19:30			Sample Weight:		1
	Run Time (min):		70			Sample Amount:		1
	No.	Ret.Time	Peak Name	Height	Spectrum Name		Lib.Name	Match
		min		mAU	in Library			with Lib
	1	0.116667	n.a.	0.02216	n.a.		n.a.	n.a.
	2	0.153333	n.a.	0.00432	n.a.		n.a.	n.a.
	3	0.32	n.a.	0.00951	n.a.		n.a.	n.a.
	4	0.4	n.a.	0.01007	n.a.		n.a.	n.a.
	5	0.483333	n.a.	0.01176	n.a.		n.a.	n.a.
	6	0.556667	n.a.	0.0016	n.a.		n.a.	n.a.
	7	0.63	n.a.	0.01043	n.a.		n.a.	n.a.
	8	0.7	n.a.	0.00681	n.a.		n.a.	n.a.
	9	0.766667	n.a.	0.00099	n.a.		n.a.	n.a.
	10	0.8	n.a.	0.00239	n.a.		n.a.	n.a.
	11	0.876667	n.a.	0.00819	n.a.		n.a.	n.a.
	12	0.923333	n.a.	0.00864	n.a.		n.a.	n.a.
	13	0.99	n.a.	0.00143	n.a.		n.a.	n.a.
	14	1.03667	n.a.	0.01349	n.a.		n.a.	n.a.
	15	1.07333	n.a.	0.01479	n.a.		n.a.	n.a.
	16	1.15333	n.a.	0.00103	n.a.		n.a.	n.a.
	17	1.31	n.a.	0.05742	n.a.		n.a.	n.a.
	18	1.37667	n.a.	0.06512	n.a.		n.a.	n.a.
	19	1.48333	n.a.	0.24689	n.a.		n.a.	n.a.
	20	1.56333	n.a.	0.46228	n.a.		n.a.	n.a.
	21	1.62	n.a.	0.39838	n.a.		n.a.	n.a.
	22	1.73333	n.a.	1.19868	n.a.		n.a.	n.a.
	23	1.83667	n.a.	13.9002	n.a.		n.a.	n.a.
	24	1.96	n.a.	0.1384	n.a.		n.a.	n.a.
	25	2.09	n.a.	0.73434	n.a.		n.a.	n.a.
	26	2.29333	n.a.	0.12779	n.a.		n.a.	n.a.
	27	2.44	n.a.	0.01515	n.a.		n.a.	n.a.
	28	2.47333	n.a.	0.00104	n.a.		n.a.	n.a.
	29	2.54333	n.a.	0.01419	n.a.		n.a.	n.a.
	30	2.59333	n.a.	0.01355	n.a.		n.a.	n.a.
	31	2.66	n.a.	0.00371	n.a.		n.a.	n.a.
	32	2.68667	n.a.	0.00049	n.a.		n.a.	n.a.
	33	2.83333	n.a.	0.04189	n.a.		n.a.	n.a.
	34	3.11	n.a.	0.12023	n.a.		n.a.	n.a.
	35	3.72	n.a.	0.0835	n.a.		n.a.	n.a.
	36	4.00667	n.a.	0.0026	n.a.		n.a.	n.a.
	37	4.14	n.a.	0.01112	n.a.		n.a.	n.a.
	38	4.26667	n.a.	0.00426	n.a.		n.a.	n.a.
	39	4.39	n.a.	0.01154	n.a.		n.a.	n.a.
	40	4.57333	n.a.	0.01705	n.a.		n.a.	n.a.
	41	4.61667	1-CQA	0.00426	n.a.		n.a.	n.a.
	42	5.66333	n.a.	0.01154	n.a.		n.a.	n.a.
	43	6.77667	n.a.	0.00324	n.a.		n.a.	n.a.
	44	7.94667	3-CQA	56.98	n.a.		n.a.	n.a.
	45	9.11667	n.a.	0.00324	n.a.		n.a.	n.a.
	46	9.20667	n.a.	0.00505	n.a.		n.a.	n.a.
	47	9.32667	n.a.	0.00392	n.a.		n.a.	n.a.
	48	9.40333	n.a.	0.0029	n.a.		n.a.	n.a.
	49	9.47	n.a.	0.0038	n.a.		n.a.	n.a.
	50	9.57667	n.a.	0.01504	n.a.		n.a.	n.a.
	51	9.68333	n.a.	0.01985	n.a.		n.a.	n.a.
	52	9.72667	n.a.	0.0034	n.a.		n.a.	n.a.
	53	9.95	n.a.	0.00603	n.a.		n.a.	n.a.
	54	10.6933	n.a.	0.37577	n.a.		n.a.	n.a.
	55	10.99	n.a.	0.30478	n.a.		n.a.	n.a.
	56	11.3833	n.a.	0.01043	n.a.		n.a.	n.a.
	57	11.45	n.a.	0.00643	n.a.		n.a.	n.a.
	58	11.64	n.a.	0.00488	n.a.		n.a.	n.a.
	59	11.6967	n.a.	0.01123	n.a.		n.a.	n.a.
	60	11.8067	n.a.	0.02873	n.a.		n.a.	n.a.
	61	12.5433	n.a.	0.32992	n.a.		n.a.	n.a.
	62	12.9367	n.a.	0.01324	n.a.		n.a.	n.a.
	63	13.0467	n.a.	0.00557	n.a.		n.a.	n.a.
	64	13.1133	n.a.	0.00197	n.a.		n.a.	n.a.
	65	13.1867	n.a.	0.00555	n.a.		n.a.	n.a.
	66	13.2567	n.a.	0.00381	n.a.		n.a.	n.a.
	67	13.3867	n.a.	0.00927	n.a.		n.a.	n.a.
	68	13.55	n.a.	0.00729	n.a.		n.a.	n.a.
	69	13.7067	n.a.	0.00786	n.a.		n.a.	n.a.
	70	13.8133	n.a.	0.00552	n.a.		n.a.	n.a.
	71	13.8633	n.a.	0.00622	n.a.		n.a.	n.a.
	72	14.0833	n.a.	0.00958	n.a.		n.a.	n.a.
	73	14.2433	n.a.	0.00927	n.a.		n.a.	n.a.
	74	14.32	n.a.	0.01171	n.a.		n.a.	n.a.
	75	14.4033	n.a.	0.00331	n.a.		n.a.	n.a.
	76	14.5167	n.a.	0.00758	n.a.		n.a.	n.a.
	77	14.6067	n.a.	0.00507	n.a.		n.a.	n.a.
	78	14.6967	n.a.	0.00184	n.a.		n.a.	n.a.
	79	14.7433	n.a.	0.00182	n.a.		n.a.	n.a.
	80	14.7967	n.a.	0.01047	n.a.		n.a.	n.a.
	81	14.87	n.a.	0.00925	n.a.		n.a.	n.a.
	82	14.9967	n.a.	0.00562	n.a.		n.a.	n.a.
	83	15.08	n.a.	0.00696	n.a.		n.a.	n.a.
	84	15.9133	n.a.	0.76406	n.a.		n.a.	n.a.
	85	16.39	n.a.	0.12479	n.a.		n.a.	n.a.
	86	16.4533	n.a.	0.00848	n.a.		n.a.	n.a.
	87	16.7067	n.a.	0.00215	n.a.		n.a.	n.a.
	88	16.8067	n.a.	0.00715	n.a.		n.a.	n.a.
	89	16.8933	n.a.	0.02494	n.a.		n.a.	n.a.
	90	17.5967	5-CQA	344	n.a.		n.a.	n.a.
	91	18.19	n.a.	0.22119	n.a.		n.a.	n.a.
	92	18.5333	n.a.	0.28813	n.a.		n.a.	n.a.
	93	18.8967	n.a.	0.14315	n.a.		n.a.	n.a.
	94	20.8533	4-CQA	76	n.a.		n.a.	n.a.
	95	23.7567	n.a.	0.06456	n.a.		n.a.	n.a.
	96	23.8233	n.a.	0.00629	n.a.		n.a.	n.a.
	97	23.9267	n.a.	0.00727	n.a.		n.a.	n.a.
	98	24	n.a.	0.0056	n.a.		n.a.	n.a.
	99	24.1533	n.a.	0.0044	n.a.		n.a.	n.a.
	100	24.2633	n.a.	0.00523	n.a.		n.a.	n.a.
	101	24.3233	n.a.	0.00501	n.a.		n.a.	n.a.
	102	24.44	n.a.	0.0078	n.a.		n.a.	n.a.
	103	24.5	n.a.	0.00167	n.a.		n.a.	n.a.
	104	24.5367	n.a.	0.00914	n.a.		n.a.	n.a.
	105	24.6533	n.a.	0.01594	n.a.		n.a.	n.a.
	106	24.73	n.a.	0.0017	n.a.		n.a.	n.a.
	107	24.79	n.a.	0.0055	n.a.		n.a.	n.a.
	108	24.9033	n.a.	0.0059	n.a.		n.a.	n.a.
	109	24.95	n.a.	0.04093	n.a.		n.a.	n.a.
	110	25.1033	n.a.	0.00316	n.a.		n.a.	n.a.
	111	25.1667	n.a.	0.00386	n.a.		n.a.	n.a.
	112	25.26	n.a.	0.01501	n.a.		n.a.	n.a.
	113	25.6167	n.a.	0.1395	n.a.		n.a.	n.a.
	114	25.9067	n.a.	0.19557	n.a.		n.a.	n.a.
	115	26.3033	n.a.	0.00384	n.a.		n.a.	n.a.
	116	26.54	n.a.	0.09131	n.a.		n.a.	n.a.
	117	26.57	n.a.	0.00346	n.a.		n.a.	n.a.
	118	27.0533	n.a.	6.52146	n.a.		n.a.	n.a.
	119	27.5767	n.a.	0.63631	n.a.		n.a.	n.a.
	120	27.98	n.a.	0.84296	n.a.		n.a.	n.a.
	121	28.2233	Puerarin	400.87	n.a.		n.a.	n.a.
	122	28.6633	n.a.	1.25929	n.a.		n.a.	n.a.
	123	28.9733	n.a.	6.7933	n.a.		n.a.	n.a.
	124	29.2567	n.a.	0.11938	n.a.		n.a.	n.a.
	125	29.5767	n.a.	0.72418	n.a.		n.a.	n.a.
	126	30.1233	n.a.	2.32104	n.a.		n.a.	n.a.
	127	30.4067	n.a.	0.11891	n.a.		n.a.	n.a.
	128	30.6533	1,3-diCQA	0.11938	n.a.		n.a.	n.a.
	129	31.11	n.a.	0.30755	n.a.		n.a.	n.a.
	130	31.3667	n.a.	4.2455	n.a.		n.a.	n.a.
	131	31.7933	n.a.	0.54235	n.a.		n.a.	n.a.
	132	32.11	n.a.	2.22482	n.a.		n.a.	n.a.
	133	32.32	n.a.	1.79493	n.a.		n.a.	n.a.
	134	32.5233	n.a.	1.74639	n.a.		n.a.	n.a.
	135	32.5833	n.a.	0.09555	n.a.		n.a.	n.a.
	136	32.75	n.a.	0.31201	n.a.		n.a.	n.a.
	137	33.29	n.a.	0.23199	n.a.		n.a.	n.a.
	138	33.48	n.a.	1.83735	n.a.		n.a.	n.a.
	139	33.7467	n.a.	0.06597	n.a.		n.a.	n.a.
	140	33.9333	n.a.	0.21948	n.a.		n.a.	n.a.
	141	34.4267	n.a.	1.34783	n.a.		n.a.	n.a.
	142	34.8067	n.a.	0.06397	n.a.		n.a.	n.a.
	143	35.0667	n.a.	1.90957	n.a.		n.a.	n.a.
	144	35.8967	n.a.	1.39762	n.a.		n.a.	n.a.
	145	36.3133	1,4 diCQA	0.09555	n.a.		n.a.	n.a.
	146	37.0333	n.a.	0.05518	n.a.		n.a.	n.a.
	147	37.3467	n.a.	3.68962	n.a.		n.a.	n.a.
	148	38.0433	n.a.	1.21947	n.a.		n.a.	n.a.
	149	38.4533	n.a.	0.94338	n.a.		n.a.	n.a.
	150	38.91	n.a.	3.70031	n.a.		n.a.	n.a.
	151	39.5767	n.a.	0.25735	n.a.		n.a.	n.a.
	152	40.4567	n.a.	123.98	n.a.		n.a.	n.a.
	153	40.93	3,4 diCQA	144.9	n.a.		n.a.	n.a.
	154	41.7933	n.a.	0.0004	n.a.		n.a.	n.a.
	155	42.3433	n.a.	20.3013	n.a.		n.a.	n.a.
	156	42.7967	1,5 diCQA	0.94338	n.a.		n.a.	n.a.
	157	44.12	n.a.	0.00998	n.a.		n.a.	n.a.
	158	44.2267	n.a.	0.00751	n.a.		n.a.	n.a.
	159	45.3567	3,5 diCQA	456.8	n.a.		n.a.	n.a.
	160	46.65	n.a.	55.2629	n.a.		n.a.	n.a.
	161	47.92	n.a.	0.00132	n.a.		n.a.	n.a.
	162	48.18	n.a.	1.15183	n.a.		n.a.	n.a.
	163	49.96	n.a.	2.31593	n.a.		n.a.	n.a.
	164	50.9667	n.a.	1.57016	n.a.		n.a.	n.a.
	165	51.69	n.a.	0.00451	n.a.		n.a.	n.a.
	166	52.61	n.a.	0.34128	n.a.		n.a.	n.a.
	167	52.7333	n.a.	0.00479	n.a.		n.a.	n.a.
	168	52.7967	n.a.	0.00317	n.a.		n.a.	n.a.
	169	52.85	n.a.	0.0202	n.a.		n.a.	n.a.
	170	53.28	n.a.	0.0002	n.a.		n.a.	n.a.
	171	53.4367	n.a.	0.00265	n.a.		n.a.	n.a.
	172	53.53	n.a.	0.01165	n.a.		n.a.	n.a.
	173	53.5933	n.a.	0.00227	n.a.		n.a.	n.a.
	174	53.6567	n.a.	0.0009	n.a.		n.a.	n.a.
	175	53.6933	n.a.	0.02148	n.a.		n.a.	n.a.
	176	53.84	n.a.	0.00304	n.a.		n.a.	n.a.
	177	53.8967	n.a.	0.02806	n.a.		n.a.	n.a.
	178	53.94	n.a.	0.0052	n.a.		n.a.	n.a.
	179	54.1667	n.a.	0.00873	n.a.		n.a.	n.a.
	180	54.3167	n.a.	0.00958	n.a.		n.a.	n.a.
	181	54.3833	n.a.	0.00598	n.a.		n.a.	n.a.
	182	54.4367	n.a.	0.00031	n.a.		n.a.	n.a.
	183	54.5733	n.a.	0.01272	n.a.		n.a.	n.a.
	184	54.6367	n.a.	0.01999	n.a.		n.a.	n.a.
	185	54.6967	n.a.	0.00082	n.a.		n.a.	n.a.
	186	54.9733	n.a.	0.02057	n.a.		n.a.	n.a.
	187	55.04	n.a.	0.0195	n.a.		n.a.	n.a.
	188	55.13	n.a.	0.0069	n.a.		n.a.	n.a.
	189	55.1767	n.a.	0.00642	n.a.		n.a.	n.a.
	190	55.2233	n.a.	0.00739	n.a.		n.a.	n.a.
	191	55.2767	n.a.	0.00904	n.a.		n.a.	n.a.
	192	55.3433	n.a.	0.00982	n.a.		n.a.	n.a.
	193	55.4433	n.a.	0.00579	n.a.		n.a.	n.a.
	194	55.5167	n.a.	0.00164	n.a.		n.a.	n.a.
	195	55.6233	n.a.	0.00601	n.a.		n.a.	n.a.
	196	55.71	n.a.	0.01233	n.a.		n.a.	n.a.
	197	55.7767	n.a.	0.00339	n.a.		n.a.	n.a.
	198	55.91	n.a.	0.00394	n.a.		n.a.	n.a.
	199	56.9433	4,5 diCQA	176	n.a.		n.a.	n.a.
	200	57.79	n.a.	4.14958	n.a.		n.a.	n.a.
	201	57.8933	n.a.	60.1993	n.a.		n.a.	n.a.
	202	57.9933	n.a.	0.00339	n.a.		n.a.	n.a.
	203	58.1067	n.a.	0.00339	n.a.		n.a.	n.a.
	204	58.3367	n.a.	0.00339	n.a.		n.a.	n.a.
	205	58.52	n.a.	0.39699	n.a.		n.a.	n.a.
	206	58.6	n.a.	1.98256	n.a.		n.a.	n.a.
	207	58.7667	n.a.	1.64644	n.a.		n.a.	n.a.
	208	58.8467	n.a.	0.14476	n.a.		n.a.	n.a.
	209	58.99	n.a.	4.28941	n.a.		n.a.	n.a.
	210	59.14	n.a.	0.22551	n.a.		n.a.	n.a.
	211	59.24	n.a.	6.2366	n.a.		n.a.	n.a.
	212	59.39	n.a.	0.25154	n.a.		n.a.	n.a.
	213	59.4833	n.a.	3.77971	n.a.		n.a.	n.a.
	214	59.5667	n.a.	0.09293	n.a.		n.a.	n.a.
	215	59.6	n.a.	0.89486	n.a.		n.a.	n.a.
	216	59.7267	n.a.	1.92529	n.a.		n.a.	n.a.
	217	59.8367	n.a.	0.54093	n.a.		n.a.	n.a.
	218	59.9767	n.a.	0.18488	n.a.		n.a.	n.a.
	219	60.04	n.a.	0.03824	n.a.		n.a.	n.a.
	220	60.1333	n.a.	0.17309	n.a.		n.a.	n.a.
	221	60.2467	n.a.	0.03917	n.a.		n.a.	n.a.
	222	60.2933	n.a.	0.37036	n.a.		n.a.	n.a.
	223	60.42	n.a.	0.34168	n.a.		n.a.	n.a.
	224	60.5067	n.a.	0.67513	n.a.		n.a.	n.a.
	225	60.6733	n.a.	1.05183	n.a.		n.a.	n.a.
	226	60.7867	n.a.	0.15533	n.a.		n.a.	n.a.
	227	60.88	n.a.	0.65875	n.a.		n.a.	n.a.
	228	60.9467	n.a.	2.2918	n.a.		n.a.	n.a.
	229	61.0233	n.a.	63.6729	n.a.		n.a.	n.a.
	230	61.1833	n.a.	2.30616	n.a.		n.a.	n.a.
	231	61.2567	n.a.	1.529	n.a.		n.a.	n.a.
	232	61.5567	n.a.	0.06234	n.a.		n.a.	n.a.
	233	61.6833	n.a.	0.32755	n.a.		n.a.	n.a.
	234	61.74	n.a.	0.09772	n.a.		n.a.	n.a.
	235	61.8567	n.a.	0.38617	n.a.		n.a.	n.a.
	236	61.9533	n.a.	0.05772	n.a.		n.a.	n.a.
	237	62.0867	n.a.	0.08002	n.a.		n.a.	n.a.
	238	62.1767	n.a.	0.03346	n.a.		n.a.	n.a.
	239	62.24	n.a.	0.01622	n.a.		n.a.	n.a.
	240	62.3267	n.a.	0.25781	n.a.		n.a.	n.a.
	241	62.3767	n.a.	0.02147	n.a.		n.a.	n.a.
	242	62.5567	n.a.	0.02556	n.a.		n.a.	n.a.
	243	62.6467	n.a.	0.63751	n.a.		n.a.	n.a.
	244	62.74	n.a.	16.3284	n.a.		n.a.	n.a.
	245	62.9533	n.a.	1.73053	n.a.		n.a.	n.a.
	246	63.4	n.a.	0.23762	n.a.		n.a.	n.a.
	247	64.43	n.a.	0.00934	n.a.		n.a.	n.a.
	248	64.6467	n.a.	0.00014	n.a.		n.a.	n.a.
	249	64.88	n.a.	0.0105	n.a.		n.a.	n.a.
	250	64.9567	n.a.	0.00966	n.a.		n.a.	n.a.
	251	65.1	n.a.	0.01277	n.a.		n.a.	n.a.
	252	65.24	n.a.	0.00496	n.a.		n.a.	n.a.
	253	65.4067	n.a.	0.01119	n.a.		n.a.	n.a.
	254	65.93	n.a.	0.00042	n.a.		n.a.	n.a.
	255	66.06	n.a.	0.00312	n.a.		n.a.	n.a.
	256	67.3767	n.a.	0.0053	n.a.		n.a.	n.a.
	257	67.4933	n.a.	0.00856	n.a.		n.a.	n.a.
	258	67.5633	n.a.	0.01337	n.a.		n.a.	n.a.
	259	67.62	n.a.	0.0016	n.a.		n.a.	n.a.
	260	67.6533	n.a.	0.01215	n.a.		n.a.	n.a.
	261	67.7167	n.a.	0.01425	n.a.		n.a.	n.a.
	262	67.7967	n.a.	0.01197	n.a.		n.a.	n.a.
	263	67.8667	n.a.	0.00131	n.a.		n.a.	n.a.
	264	67.96	n.a.	0.00484	n.a.		n.a.	n.a.
	265	68.11	n.a.	0.012	n.a.		n.a.	n.a.
	266	68.2	n.a.	0.00631	n.a.		n.a.	n.a.
	267	68.2867	n.a.	0.00718	n.a.		n.a.	n.a.
	268	68.38	n.a.	0.00343	n.a.		n.a.	n.a.
	269	68.5367	n.a.	0.00681	n.a.		n.a.	n.a.
	270	68.6367	n.a.	0.00527	n.a.		n.a.	n.a.
	271	68.7	n.a.	0.00814	n.a.		n.a.	n.a.
	272	68.7667	n.a.	0.01211	n.a.		n.a.	n.a.
	273	68.8267	n.a.	0.01143	n.a.		n.a.	n.a.
	274	68.8933	n.a.	0.00591	n.a.		n.a.	n.a.
	275	68.9767	n.a.	0.00126	n.a.		n.a.	n.a.
	276	69.05	n.a.	0.00533	n.a.		n.a.	n.a.
	277	69.1333	n.a.	0.01441	n.a.		n.a.	n.a.
	278	69.19	n.a.	0.00953	n.a.		n.a.	n.a.
	279	69.2133	n.a.	0.00937	n.a.		n.a.	n.a.
	280	69.2767	n.a.	0.00338	n.a.		n.a.	n.a.
	281	69.32	n.a.	0.00271	n.a.		n.a.	n.a.
	282	69.35	n.a.	0.00033	n.a.		n.a.	n.a.
	283	69.3933	n.a.	0.00199	n.a.		n.a.	n.a.
	284	69.4433	n.a.	0.00388	n.a.		n.a.	n.a.
	285	69.52	n.a.	0.00065	n.a.		n.a.	n.a.
	286	69.5467	n.a.	0.00262	n.a.		n.a.	n.a.
	287	69.6533	n.a.	0.00413	n.a.		n.a.	n.a.
	288	69.73	n.a.	0.00245	n.a.		n.a.	n.a.
	289	69.84	n.a.	0.00934	n.a.		n.a.	n.a.
	290	69.9067	n.a.	0.00342	n.a.		n.a.	n.a.
	291	69.94	n.a.	0.00401	n.a.		n.a.	n.a.
	Total:			2111.65				n.a.

## Sheet: Yerba mate 2
	Sample Name:		Yerba 2			Injection Volume:		10
	Vial Number:		GD3			Channel:		UV_VIS_1
	Sample Type:		unknown			Wavelength:		320.0
	Control Program:		20200611 CQAs 1_5mlmin-1 70min			Bandwidth:		4
	Quantif. Method:		20200611 CQAs 1_5mlmin-1 70min			Dilution Factor:		1
	Recording Time:		2020-10-21 22:19:30			Sample Weight:		1
	Run Time (min):		70			Sample Amount:		1
	No.	Ret.Time	Peak Name	Height	Spectrum Name		Lib.Name	Match
		min		mAU	in Library			with Lib
	1	0.116667	n.a.	0.02216	n.a.		n.a.	n.a.
	2	0.153333	n.a.	0.00432	n.a.		n.a.	n.a.
	3	0.32	n.a.	0.00951	n.a.		n.a.	n.a.
	4	0.4	n.a.	0.01007	n.a.		n.a.	n.a.
	5	0.483333	n.a.	0.01176	n.a.		n.a.	n.a.
	6	0.556667	n.a.	0.0016	n.a.		n.a.	n.a.
	7	0.63	n.a.	0.01043	n.a.		n.a.	n.a.
	8	0.7	n.a.	0.00681	n.a.		n.a.	n.a.
	9	0.766667	n.a.	0.00099	n.a.		n.a.	n.a.
	10	0.8	n.a.	0.00239	n.a.		n.a.	n.a.
	11	0.876667	n.a.	0.00819	n.a.		n.a.	n.a.
	12	0.923333	n.a.	0.00864	n.a.		n.a.	n.a.
	13	0.99	n.a.	0.00143	n.a.		n.a.	n.a.
	14	1.03667	n.a.	0.01349	n.a.		n.a.	n.a.
	15	1.07333	n.a.	0.01479	n.a.		n.a.	n.a.
	16	1.15333	n.a.	0.00103	n.a.		n.a.	n.a.
	17	1.31	n.a.	0.05742	n.a.		n.a.	n.a.
	18	1.37667	n.a.	0.06512	n.a.		n.a.	n.a.
	19	1.48333	n.a.	0.24689	n.a.		n.a.	n.a.
	20	1.56333	n.a.	0.46228	n.a.		n.a.	n.a.
	21	1.62	n.a.	0.39838	n.a.		n.a.	n.a.
	22	1.73333	n.a.	1.19868	n.a.		n.a.	n.a.
	23	1.83667	n.a.	13.9002	n.a.		n.a.	n.a.
	24	1.96	n.a.	0.1384	n.a.		n.a.	n.a.
	25	2.09	n.a.	0.73434	n.a.		n.a.	n.a.
	26	2.29333	n.a.	0.12779	n.a.		n.a.	n.a.
	27	2.44	n.a.	0.01515	n.a.		n.a.	n.a.
	28	2.47333	n.a.	0.00104	n.a.		n.a.	n.a.
	29	2.54333	n.a.	0.01419	n.a.		n.a.	n.a.
	30	2.59333	n.a.	0.01355	n.a.		n.a.	n.a.
	31	2.66	n.a.	0.00371	n.a.		n.a.	n.a.
	32	2.68667	n.a.	0.00049	n.a.		n.a.	n.a.
	33	2.83333	n.a.	0.04189	n.a.		n.a.	n.a.
	34	3.11	n.a.	0.12023	n.a.		n.a.	n.a.
	35	3.72	n.a.	0.0835	n.a.		n.a.	n.a.
	36	4.00667	n.a.	0.0026	n.a.		n.a.	n.a.
	37	4.14	n.a.	0.01112	n.a.		n.a.	n.a.
	38	4.26667	n.a.	0.00426	n.a.		n.a.	n.a.
	39	4.39	n.a.	0.01154	n.a.		n.a.	n.a.
	40	4.57333	n.a.	0.01705	n.a.		n.a.	n.a.
	41	4.61667	1-CQA	0.00426	n.a.		n.a.	n.a.
	42	5.66333	n.a.	0.01154	n.a.		n.a.	n.a.
	43	6.77667	n.a.	0.00324	n.a.		n.a.	n.a.
	44	7.94667	3-CQA	56.98	n.a.		n.a.	n.a.
	45	9.11667	n.a.	0.00324	n.a.		n.a.	n.a.
	46	9.20667	n.a.	0.00505	n.a.		n.a.	n.a.
	47	9.32667	n.a.	0.00392	n.a.		n.a.	n.a.
	48	9.40333	n.a.	0.0029	n.a.		n.a.	n.a.
	49	9.47	n.a.	0.0038	n.a.		n.a.	n.a.
	50	9.57667	n.a.	0.01504	n.a.		n.a.	n.a.
	51	9.68333	n.a.	0.01985	n.a.		n.a.	n.a.
	52	9.72667	n.a.	0.0034	n.a.		n.a.	n.a.
	53	9.95	n.a.	0.00603	n.a.		n.a.	n.a.
	54	10.6933	n.a.	0.37577	n.a.		n.a.	n.a.
	55	10.99	n.a.	0.30478	n.a.		n.a.	n.a.
	56	11.3833	n.a.	0.01043	n.a.		n.a.	n.a.
	57	11.45	n.a.	0.00643	n.a.		n.a.	n.a.
	58	11.64	n.a.	0.00488	n.a.		n.a.	n.a.
	59	11.6967	n.a.	0.01123	n.a.		n.a.	n.a.
	60	11.8067	n.a.	0.02873	n.a.		n.a.	n.a.
	61	12.5433	n.a.	0.32992	n.a.		n.a.	n.a.
	62	12.9367	n.a.	0.01324	n.a.		n.a.	n.a.
	63	13.0467	n.a.	0.00557	n.a.		n.a.	n.a.
	64	13.1133	n.a.	0.00197	n.a.		n.a.	n.a.
	65	13.1867	n.a.	0.00555	n.a.		n.a.	n.a.
	66	13.2567	n.a.	0.00381	n.a.		n.a.	n.a.
	67	13.3867	n.a.	0.00927	n.a.		n.a.	n.a.
	68	13.55	n.a.	0.00729	n.a.		n.a.	n.a.
	69	13.7067	n.a.	0.00786	n.a.		n.a.	n.a.
	70	13.8133	n.a.	0.00552	n.a.		n.a.	n.a.
	71	13.8633	n.a.	0.00622	n.a.		n.a.	n.a.
	72	14.0833	n.a.	0.00958	n.a.		n.a.	n.a.
	73	14.2433	n.a.	0.00927	n.a.		n.a.	n.a.
	74	14.32	n.a.	0.01171	n.a.		n.a.	n.a.
	75	14.4033	n.a.	0.00331	n.a.		n.a.	n.a.
	76	14.5167	n.a.	0.00758	n.a.		n.a.	n.a.
	77	14.6067	n.a.	0.00507	n.a.		n.a.	n.a.
	78	14.6967	n.a.	0.00184	n.a.		n.a.	n.a.
	79	14.7433	n.a.	0.00182	n.a.		n.a.	n.a.
	80	14.7967	n.a.	0.01047	n.a.		n.a.	n.a.
	81	14.87	n.a.	0.00925	n.a.		n.a.	n.a.
	82	14.9967	n.a.	0.00562	n.a.		n.a.	n.a.
	83	15.08	n.a.	0.00696	n.a.		n.a.	n.a.
	84	15.9133	n.a.	0.76406	n.a.		n.a.	n.a.
	85	16.39	n.a.	0.12479	n.a.		n.a.	n.a.
	86	16.4533	n.a.	0.00848	n.a.		n.a.	n.a.
	87	16.7067	n.a.	0.00215	n.a.		n.a.	n.a.
	88	16.8067	n.a.	0.00715	n.a.		n.a.	n.a.
	89	16.8933	n.a.	0.02494	n.a.		n.a.	n.a.
	90	17.5967	5-CQA	344	n.a.		n.a.	n.a.
	91	18.19	n.a.	0.22119	n.a.		n.a.	n.a.
	92	18.5333	n.a.	0.28813	n.a.		n.a.	n.a.
	93	18.8967	n.a.	0.14315	n.a.		n.a.	n.a.
	94	20.8533	4-CQA	76	n.a.		n.a.	n.a.
	95	23.7567	n.a.	0.06456	n.a.		n.a.	n.a.
	96	23.8233	n.a.	0.00629	n.a.		n.a.	n.a.
	97	23.9267	n.a.	0.00727	n.a.		n.a.	n.a.
	98	24	n.a.	0.0056	n.a.		n.a.	n.a.
	99	24.1533	n.a.	0.0044	n.a.		n.a.	n.a.
	100	24.2633	n.a.	0.00523	n.a.		n.a.	n.a.
	101	24.3233	n.a.	0.00501	n.a.		n.a.	n.a.
	102	24.44	n.a.	0.0078	n.a.		n.a.	n.a.
	103	24.5	n.a.	0.00167	n.a.		n.a.	n.a.
	104	24.5367	n.a.	0.00914	n.a.		n.a.	n.a.
	105	24.6533	n.a.	0.01594	n.a.		n.a.	n.a.
	106	24.73	n.a.	0.0017	n.a.		n.a.	n.a.
	107	24.79	n.a.	0.0055	n.a.		n.a.	n.a.
	108	24.9033	n.a.	0.0059	n.a.		n.a.	n.a.
	109	24.95	n.a.	0.04093	n.a.		n.a.	n.a.
	110	25.1033	n.a.	0.00316	n.a.		n.a.	n.a.
	111	25.1667	n.a.	0.00386	n.a.		n.a.	n.a.
	112	25.26	n.a.	0.01501	n.a.		n.a.	n.a.
	113	25.6167	n.a.	0.1395	n.a.		n.a.	n.a.
	114	25.9067	n.a.	0.19557	n.a.		n.a.	n.a.
	115	26.3033	n.a.	0.00384	n.a.		n.a.	n.a.
	116	26.54	n.a.	0.09131	n.a.		n.a.	n.a.
	117	26.57	n.a.	0.00346	n.a.		n.a.	n.a.
	118	27.0533	n.a.	6.52146	n.a.		n.a.	n.a.
	119	27.5767	n.a.	0.63631	n.a.		n.a.	n.a.
	120	27.98	n.a.	0.84296	n.a.		n.a.	n.a.
	121	28.2233	Puerarin	400.87	n.a.		n.a.	n.a.
	122	28.6633	n.a.	1.25929	n.a.		n.a.	n.a.
	123	28.9733	n.a.	6.7933	n.a.		n.a.	n.a.
	124	29.2567	n.a.	0.11938	n.a.		n.a.	n.a.
	125	29.5767	n.a.	0.72418	n.a.		n.a.	n.a.
	126	30.1233	n.a.	2.32104	n.a.		n.a.	n.a.
	127	30.4067	n.a.	0.11891	n.a.		n.a.	n.a.
	128	30.6533	1,3-diCQA	0.11938	n.a.		n.a.	n.a.
	129	31.11	n.a.	0.30755	n.a.		n.a.	n.a.
	130	31.3667	n.a.	4.2455	n.a.		n.a.	n.a.
	131	31.7933	n.a.	0.54235	n.a.		n.a.	n.a.
	132	32.11	n.a.	2.22482	n.a.		n.a.	n.a.
	133	32.32	n.a.	1.79493	n.a.		n.a.	n.a.
	134	32.5233	n.a.	1.74639	n.a.		n.a.	n.a.
	135	32.5833	n.a.	0.09555	n.a.		n.a.	n.a.
	136	32.75	n.a.	0.31201	n.a.		n.a.	n.a.
	137	33.29	n.a.	0.23199	n.a.		n.a.	n.a.
	138	33.48	n.a.	1.83735	n.a.		n.a.	n.a.
	139	33.7467	n.a.	0.06597	n.a.		n.a.	n.a.
	140	33.9333	n.a.	0.21948	n.a.		n.a.	n.a.
	141	34.4267	n.a.	1.34783	n.a.		n.a.	n.a.
	142	34.8067	n.a.	0.06397	n.a.		n.a.	n.a.
	143	35.0667	n.a.	1.90957	n.a.		n.a.	n.a.
	144	35.8967	n.a.	1.39762	n.a.		n.a.	n.a.
	145	36.3133	1,4 diCQA	0.09555	n.a.		n.a.	n.a.
	146	37.0333	n.a.	0.05518	n.a.		n.a.	n.a.
	147	37.3467	n.a.	3.68962	n.a.		n.a.	n.a.
	148	38.0433	n.a.	1.21947	n.a.		n.a.	n.a.
	149	38.4533	n.a.	0.94338	n.a.		n.a.	n.a.
	150	38.91	n.a.	3.70031	n.a.		n.a.	n.a.
	151	39.5767	n.a.	0.25735	n.a.		n.a.	n.a.
	152	40.4567	n.a.	123.98	n.a.		n.a.	n.a.
	153	40.93	3,4 diCQA	144.9	n.a.		n.a.	n.a.
	154	41.7933	n.a.	0.0004	n.a.		n.a.	n.a.
	155	42.3433	n.a.	20.3013	n.a.		n.a.	n.a.
	156	42.7967	1,5 diCQA	0.94338	n.a.		n.a.	n.a.
	157	44.12	n.a.	0.00998	n.a.		n.a.	n.a.
	158	44.2267	n.a.	0.00751	n.a.		n.a.	n.a.
	159	45.3567	3,5 diCQA	567.8	n.a.		n.a.	n.a.
	160	46.65	n.a.	55.2629	n.a.		n.a.	n.a.
	161	47.92	n.a.	0.00132	n.a.		n.a.	n.a.
	162	48.18	n.a.	1.15183	n.a.		n.a.	n.a.
	163	49.96	n.a.	2.31593	n.a.		n.a.	n.a.
	164	50.9667	n.a.	1.57016	n.a.		n.a.	n.a.
	165	51.69	n.a.	0.00451	n.a.		n.a.	n.a.
	166	52.61	n.a.	0.34128	n.a.		n.a.	n.a.
	167	52.7333	n.a.	0.00479	n.a.		n.a.	n.a.
	168	52.7967	n.a.	0.00317	n.a.		n.a.	n.a.
	169	52.85	n.a.	0.0202	n.a.		n.a.	n.a.
	170	53.28	n.a.	0.0002	n.a.		n.a.	n.a.
	171	53.4367	n.a.	0.00265	n.a.		n.a.	n.a.
	172	53.53	n.a.	0.01165	n.a.		n.a.	n.a.
	173	53.5933	n.a.	0.00227	n.a.		n.a.	n.a.
	174	53.6567	n.a.	0.0009	n.a.		n.a.	n.a.
	175	53.6933	n.a.	0.02148	n.a.		n.a.	n.a.
	176	53.84	n.a.	0.00304	n.a.		n.a.	n.a.
	177	53.8967	n.a.	0.02806	n.a.		n.a.	n.a.
	178	53.94	n.a.	0.0052	n.a.		n.a.	n.a.
	179	54.1667	n.a.	0.00873	n.a.		n.a.	n.a.
	180	54.3167	n.a.	0.00958	n.a.		n.a.	n.a.
	181	54.3833	n.a.	0.00598	n.a.		n.a.	n.a.
	182	54.4367	n.a.	0.00031	n.a.		n.a.	n.a.
	183	54.5733	n.a.	0.01272	n.a.		n.a.	n.a.
	184	54.6367	n.a.	0.01999	n.a.		n.a.	n.a.
	185	54.6967	n.a.	0.00082	n.a.		n.a.	n.a.
	186	54.9733	n.a.	0.02057	n.a.		n.a.	n.a.
	187	55.04	n.a.	0.0195	n.a.		n.a.	n.a.
	188	55.13	n.a.	0.0069	n.a.		n.a.	n.a.
	189	55.1767	n.a.	0.00642	n.a.		n.a.	n.a.
	190	55.2233	n.a.	0.00739	n.a.		n.a.	n.a.
	191	55.2767	n.a.	0.00904	n.a.		n.a.	n.a.
	192	55.3433	n.a.	0.00982	n.a.		n.a.	n.a.
	193	55.4433	n.a.	0.00579	n.a.		n.a.	n.a.
	194	55.5167	n.a.	0.00164	n.a.		n.a.	n.a.
	195	55.6233	n.a.	0.00601	n.a.		n.a.	n.a.
	196	55.71	n.a.	0.01233	n.a.		n.a.	n.a.
	197	55.7767	n.a.	0.00339	n.a.		n.a.	n.a.
	198	55.91	n.a.	0.00394	n.a.		n.a.	n.a.
	199	56.9433	4,5 diCQA	176	n.a.		n.a.	n.a.
	200	57.79	n.a.	4.14958	n.a.		n.a.	n.a.
	201	57.8933	n.a.	60.1993	n.a.		n.a.	n.a.
	202	57.9933	n.a.	0.00339	n.a.		n.a.	n.a.
	203	58.1067	n.a.	0.00339	n.a.		n.a.	n.a.
	204	58.3367	n.a.	44	n.a.		n.a.	n.a.
	205	58.52	n.a.	0.39699	n.a.		n.a.	n.a.
	206	58.6	n.a.	1.98256	n.a.		n.a.	n.a.
	207	58.7667	n.a.	21.9	n.a.		n.a.	n.a.
	208	58.8467	n.a.	0.14476	n.a.		n.a.	n.a.
	209	58.99	n.a.	4.28941	n.a.		n.a.	n.a.
	210	59.14	n.a.	0.22551	n.a.		n.a.	n.a.
	211	59.24	n.a.	6.2366	n.a.		n.a.	n.a.
	212	59.39	n.a.	0.25154	n.a.		n.a.	n.a.
	213	59.4833	n.a.	3.77971	n.a.		n.a.	n.a.
	214	59.5667	n.a.	0.09293	n.a.		n.a.	n.a.
	215	59.6	n.a.	0.89486	n.a.		n.a.	n.a.
	216	59.7267	n.a.	1.92529	n.a.		n.a.	n.a.
	217	59.8367	n.a.	0.54093	n.a.		n.a.	n.a.
	218	59.9767	n.a.	0.18488	n.a.		n.a.	n.a.
	219	60.04	n.a.	0.03824	n.a.		n.a.	n.a.
	220	60.1333	n.a.	0.17309	n.a.		n.a.	n.a.
	221	60.2467	n.a.	0.03917	n.a.		n.a.	n.a.
	222	60.2933	n.a.	0.37036	n.a.		n.a.	n.a.
	223	60.42	n.a.	0.34168	n.a.		n.a.	n.a.
	224	60.5067	n.a.	0.67513	n.a.		n.a.	n.a.
	225	60.6733	n.a.	1.05183	n.a.		n.a.	n.a.
	226	60.7867	n.a.	0.15533	n.a.		n.a.	n.a.
	227	60.88	n.a.	0.65875	n.a.		n.a.	n.a.
	228	60.9467	n.a.	2.2918	n.a.		n.a.	n.a.
	229	61.0233	n.a.	63.6729	n.a.		n.a.	n.a.
	230	61.1833	n.a.	2.30616	n.a.		n.a.	n.a.
	231	61.2567	n.a.	1.529	n.a.		n.a.	n.a.
	232	61.5567	n.a.	0.06234	n.a.		n.a.	n.a.
	233	61.6833	n.a.	0.32755	n.a.		n.a.	n.a.
	234	61.74	n.a.	0.09772	n.a.		n.a.	n.a.
	235	61.8567	n.a.	0.38617	n.a.		n.a.	n.a.
	236	61.9533	n.a.	0.05772	n.a.		n.a.	n.a.
	237	62.0867	n.a.	0.08002	n.a.		n.a.	n.a.
	238	62.1767	n.a.	0.03346	n.a.		n.a.	n.a.
	239	62.24	n.a.	0.01622	n.a.		n.a.	n.a.
	240	62.3267	n.a.	0.25781	n.a.		n.a.	n.a.
	241	62.3767	n.a.	0.02147	n.a.		n.a.	n.a.
	242	62.5567	n.a.	0.02556	n.a.		n.a.	n.a.
	243	62.6467	n.a.	0.63751	n.a.		n.a.	n.a.
	244	62.74	n.a.	16.3284	n.a.		n.a.	n.a.
	245	62.9533	n.a.	1.73053	n.a.		n.a.	n.a.
	246	63.4	n.a.	0.23762	n.a.		n.a.	n.a.
	247	64.43	n.a.	0.00934	n.a.		n.a.	n.a.
	248	64.6467	n.a.	0.00014	n.a.		n.a.	n.a.
	249	64.88	n.a.	0.0105	n.a.		n.a.	n.a.
	250	64.9567	n.a.	0.00966	n.a.		n.a.	n.a.
	251	65.1	n.a.	0.01277	n.a.		n.a.	n.a.
	252	65.24	n.a.	0.00496	n.a.		n.a.	n.a.
	253	65.4067	n.a.	0.01119	n.a.		n.a.	n.a.
	254	65.93	n.a.	0.00042	n.a.		n.a.	n.a.
	255	66.06	n.a.	0.00312	n.a.		n.a.	n.a.
	256	67.3767	n.a.	0.0053	n.a.		n.a.	n.a.
	257	67.4933	n.a.	0.00856	n.a.		n.a.	n.a.
	258	67.5633	n.a.	0.01337	n.a.		n.a.	n.a.
	259	67.62	n.a.	0.0016	n.a.		n.a.	n.a.
	260	67.6533	n.a.	0.01215	n.a.		n.a.	n.a.
	261	67.7167	n.a.	0.01425	n.a.		n.a.	n.a.
	262	67.7967	n.a.	0.01197	n.a.		n.a.	n.a.
	263	67.8667	n.a.	0.00131	n.a.		n.a.	n.a.
	264	67.96	n.a.	0.00484	n.a.		n.a.	n.a.
	265	68.11	n.a.	0.012	n.a.		n.a.	n.a.
	266	68.2	n.a.	0.00631	n.a.		n.a.	n.a.
	267	68.2867	n.a.	0.00718	n.a.		n.a.	n.a.
	268	68.38	n.a.	0.00343	n.a.		n.a.	n.a.
	269	68.5367	n.a.	0.00681	n.a.		n.a.	n.a.
	270	68.6367	n.a.	0.00527	n.a.		n.a.	n.a.
	271	68.7	n.a.	0.00814	n.a.		n.a.	n.a.
	272	68.7667	n.a.	0.01211	n.a.		n.a.	n.a.
	273	68.8267	n.a.	0.01143	n.a.		n.a.	n.a.
	274	68.8933	n.a.	0.00591	n.a.		n.a.	n.a.
	275	68.9767	n.a.	0.00126	n.a.		n.a.	n.a.
	276	69.05	n.a.	0.00533	n.a.		n.a.	n.a.
	277	69.1333	n.a.	0.01441	n.a.		n.a.	n.a.
	278	69.19	n.a.	0.00953	n.a.		n.a.	n.a.
	279	69.2133	n.a.	0.00937	n.a.		n.a.	n.a.
	280	69.2767	n.a.	0.00338	n.a.		n.a.	n.a.
	281	69.32	n.a.	0.00271	n.a.		n.a.	n.a.
	282	69.35	n.a.	0.00033	n.a.		n.a.	n.a.
	283	69.3933	n.a.	0.00199	n.a.		n.a.	n.a.
	284	69.4433	n.a.	0.00388	n.a.		n.a.	n.a.
	285	69.52	n.a.	0.00065	n.a.		n.a.	n.a.
	286	69.5467	n.a.	0.00262	n.a.		n.a.	n.a.
	287	69.6533	n.a.	0.00413	n.a.		n.a.	n.a.
	288	69.73	n.a.	0.00245	n.a.		n.a.	n.a.
	289	69.84	n.a.	0.00934	n.a.		n.a.	n.a.
	290	69.9067	n.a.	0.00342	n.a.		n.a.	n.a.
	291	69.94	n.a.	0.00401	n.a.		n.a.	n.a.
	Total:			2286.9				n.a.

## Sheet: Yerba mate 3
	Sample Name:		Yerba 3			Injection Volume:		10
	Vial Number:		GD4			Channel:		UV_VIS_1
	Sample Type:		unknown			Wavelength:		320.0
	Control Program:		20200611 CQAs 1_5mlmin-1 70min			Bandwidth:		4
	Quantif. Method:		20200611 CQAs 1_5mlmin-1 70min			Dilution Factor:		1
	Recording Time:		2020-10-21 22:19:30			Sample Weight:		1
	Run Time (min):		70			Sample Amount:		1
	No.	Ret.Time	Peak Name	Height	Spectrum Name		Lib.Name	Match
		min		mAU	in Library			with Lib
	1	0.116667	n.a.	0.02216	n.a.		n.a.	n.a.
	2	0.153333	n.a.	0.00432	n.a.		n.a.	n.a.
	3	0.32	n.a.	0.00951	n.a.		n.a.	n.a.
	4	0.4	n.a.	0.01007	n.a.		n.a.	n.a.
	5	0.483333	n.a.	0.01176	n.a.		n.a.	n.a.
	6	0.556667	n.a.	0.0016	n.a.		n.a.	n.a.
	7	0.63	n.a.	0.01043	n.a.		n.a.	n.a.
	8	0.7	n.a.	0.00681	n.a.		n.a.	n.a.
	9	0.766667	n.a.	0.00099	n.a.		n.a.	n.a.
	10	0.8	n.a.	0.00239	n.a.		n.a.	n.a.
	11	0.876667	n.a.	0.00819	n.a.		n.a.	n.a.
	12	0.923333	n.a.	0.00864	n.a.		n.a.	n.a.
	13	0.99	n.a.	0.00143	n.a.		n.a.	n.a.
	14	1.03667	n.a.	0.01349	n.a.		n.a.	n.a.
	15	1.07333	n.a.	0.01479	n.a.		n.a.	n.a.
	16	1.15333	n.a.	0.00103	n.a.		n.a.	n.a.
	17	1.31	n.a.	0.05742	n.a.		n.a.	n.a.
	18	1.37667	n.a.	0.06512	n.a.		n.a.	n.a.
	19	1.48333	n.a.	0.24689	n.a.		n.a.	n.a.
	20	1.56333	n.a.	0.46228	n.a.		n.a.	n.a.
	21	1.62	n.a.	0.39838	n.a.		n.a.	n.a.
	22	1.73333	n.a.	1.19868	n.a.		n.a.	n.a.
	23	1.83667	n.a.	13.9002	n.a.		n.a.	n.a.
	24	1.96	n.a.	0.1384	n.a.		n.a.	n.a.
	25	2.09	n.a.	0.73434	n.a.		n.a.	n.a.
	26	2.29333	n.a.	0.12779	n.a.		n.a.	n.a.
	27	2.44	n.a.	0.01515	n.a.		n.a.	n.a.
	28	2.47333	n.a.	0.00104	n.a.		n.a.	n.a.
	29	2.54333	n.a.	0.01419	n.a.		n.a.	n.a.
	30	2.59333	n.a.	0.01355	n.a.		n.a.	n.a.
	31	2.66	n.a.	0.00371	n.a.		n.a.	n.a.
	32	2.68667	n.a.	0.00049	n.a.		n.a.	n.a.
	33	2.83333	n.a.	0.04189	n.a.		n.a.	n.a.
	34	3.11	n.a.	0.12023	n.a.		n.a.	n.a.
	35	3.72	n.a.	0.0835	n.a.		n.a.	n.a.
	36	4.00667	n.a.	0.0026	n.a.		n.a.	n.a.
	37	4.14	n.a.	0.01112	n.a.		n.a.	n.a.
	38	4.26667	n.a.	0.00426	n.a.		n.a.	n.a.
	39	4.39	n.a.	0.01154	n.a.		n.a.	n.a.
	40	4.57333	n.a.	0.01705	n.a.		n.a.	n.a.
	41	4.61667	1-CQA	0.00426	n.a.		n.a.	n.a.
	42	5.66333	n.a.	0.01154	n.a.		n.a.	n.a.
	43	6.77667	n.a.	0.00324	n.a.		n.a.	n.a.
	44	7.94667	3-CQA	56.98	n.a.		n.a.	n.a.
	45	9.11667	n.a.	0.00324	n.a.		n.a.	n.a.
	46	9.20667	n.a.	0.00505	n.a.		n.a.	n.a.
	47	9.32667	n.a.	0.00392	n.a.		n.a.	n.a.
	48	9.40333	n.a.	0.0029	n.a.		n.a.	n.a.
	49	9.47	n.a.	0.0038	n.a.		n.a.	n.a.
	50	9.57667	n.a.	0.01504	n.a.		n.a.	n.a.
	51	9.68333	n.a.	0.01985	n.a.		n.a.	n.a.
	52	9.72667	n.a.	0.0034	n.a.		n.a.	n.a.
	53	9.95	n.a.	0.00603	n.a.		n.a.	n.a.
	54	10.6933	n.a.	0.37577	n.a.		n.a.	n.a.
	55	10.99	n.a.	0.30478	n.a.		n.a.	n.a.
	56	11.3833	n.a.	0.01043	n.a.		n.a.	n.a.
	57	11.45	n.a.	0.00643	n.a.		n.a.	n.a.
	58	11.64	n.a.	0.00488	n.a.		n.a.	n.a.
	59	11.6967	n.a.	0.01123	n.a.		n.a.	n.a.
	60	11.8067	n.a.	0.02873	n.a.		n.a.	n.a.
	61	12.5433	n.a.	0.32992	n.a.		n.a.	n.a.
	62	12.9367	n.a.	0.01324	n.a.		n.a.	n.a.
	63	13.0467	n.a.	0.00557	n.a.		n.a.	n.a.
	64	13.1133	n.a.	0.00197	n.a.		n.a.	n.a.
	65	13.1867	n.a.	0.00555	n.a.		n.a.	n.a.
	66	13.2567	n.a.	0.00381	n.a.		n.a.	n.a.
	67	13.3867	n.a.	0.00927	n.a.		n.a.	n.a.
	68	13.55	n.a.	0.00729	n.a.		n.a.	n.a.
	69	13.7067	n.a.	0.00786	n.a.		n.a.	n.a.
	70	13.8133	n.a.	0.00552	n.a.		n.a.	n.a.
	71	13.8633	n.a.	0.00622	n.a.		n.a.	n.a.
	72	14.0833	n.a.	0.00958	n.a.		n.a.	n.a.
	73	14.2433	n.a.	0.00927	n.a.		n.a.	n.a.
	74	14.32	n.a.	0.01171	n.a.		n.a.	n.a.
	75	14.4033	n.a.	0.00331	n.a.		n.a.	n.a.
	76	14.5167	n.a.	0.00758	n.a.		n.a.	n.a.
	77	14.6067	n.a.	0.00507	n.a.		n.a.	n.a.
	78	14.6967	n.a.	0.00184	n.a.		n.a.	n.a.
	79	14.7433	n.a.	0.00182	n.a.		n.a.	n.a.
	80	14.7967	n.a.	0.01047	n.a.		n.a.	n.a.
	81	14.87	n.a.	0.00925	n.a.		n.a.	n.a.
	82	14.9967	n.a.	0.00562	n.a.		n.a.	n.a.
	83	15.08	n.a.	0.00696	n.a.		n.a.	n.a.
	84	15.9133	n.a.	0.76406	n.a.		n.a.	n.a.
	85	16.39	n.a.	0.12479	n.a.		n.a.	n.a.
	86	16.4533	n.a.	0.00848	n.a.		n.a.	n.a.
	87	16.7067	n.a.	0.00215	n.a.		n.a.	n.a.
	88	16.8067	n.a.	0.00715	n.a.		n.a.	n.a.
	89	16.8933	n.a.	0.02494	n.a.		n.a.	n.a.
	90	17.5967	5-CQA	344	n.a.		n.a.	n.a.
	91	18.19	n.a.	0.22119	n.a.		n.a.	n.a.
	92	18.5333	n.a.	0.28813	n.a.		n.a.	n.a.
	93	18.8967	n.a.	0.14315	n.a.		n.a.	n.a.
	94	20.8533	4-CQA	76	n.a.		n.a.	n.a.
	95	23.7567	n.a.	0.06456	n.a.		n.a.	n.a.
	96	23.8233	n.a.	0.00629	n.a.		n.a.	n.a.
	97	23.9267	n.a.	0.00727	n.a.		n.a.	n.a.
	98	24	n.a.	0.0056	n.a.		n.a.	n.a.
	99	24.1533	n.a.	0.0044	n.a.		n.a.	n.a.
	100	24.2633	n.a.	0.00523	n.a.		n.a.	n.a.
	101	24.3233	n.a.	0.00501	n.a.		n.a.	n.a.
	102	24.44	n.a.	0.0078	n.a.		n.a.	n.a.
	103	24.5	n.a.	0.00167	n.a.		n.a.	n.a.
	104	24.5367	n.a.	0.00914	n.a.		n.a.	n.a.
	105	24.6533	n.a.	0.01594	n.a.		n.a.	n.a.
	106	24.73	n.a.	0.0017	n.a.		n.a.	n.a.
	107	24.79	n.a.	0.0055	n.a.		n.a.	n.a.
	108	24.9033	n.a.	0.0059	n.a.		n.a.	n.a.
	109	24.95	n.a.	0.04093	n.a.		n.a.	n.a.
	110	25.1033	n.a.	0.00316	n.a.		n.a.	n.a.
	111	25.1667	n.a.	0.00386	n.a.		n.a.	n.a.
	112	25.26	n.a.	0.01501	n.a.		n.a.	n.a.
	113	25.6167	n.a.	0.1395	n.a.		n.a.	n.a.
	114	25.9067	n.a.	0.19557	n.a.		n.a.	n.a.
	115	26.3033	n.a.	0.00384	n.a.		n.a.	n.a.
	116	26.54	n.a.	0.09131	n.a.		n.a.	n.a.
	117	26.57	n.a.	0.00346	n.a.		n.a.	n.a.
	118	27.0533	n.a.	6.52146	n.a.		n.a.	n.a.
	119	27.5767	n.a.	0.63631	n.a.		n.a.	n.a.
	120	27.98	n.a.	0.84296	n.a.		n.a.	n.a.
	121	28.2233	Puerarin	400.87	n.a.		n.a.	n.a.
	122	28.6633	n.a.	1.25929	n.a.		n.a.	n.a.
	123	28.9733	n.a.	6.7933	n.a.		n.a.	n.a.
	124	29.2567	n.a.	0.11938	n.a.		n.a.	n.a.
	125	29.5767	n.a.	0.72418	n.a.		n.a.	n.a.
	126	30.1233	n.a.	2.32104	n.a.		n.a.	n.a.
	127	30.4067	n.a.	0.11891	n.a.		n.a.	n.a.
	128	30.6533	1,3-diCQA	0.11938	n.a.		n.a.	n.a.
	129	31.11	n.a.	0.30755	n.a.		n.a.	n.a.
	130	31.3667	n.a.	4.2455	n.a.		n.a.	n.a.
	131	31.7933	n.a.	0.54235	n.a.		n.a.	n.a.
	132	32.11	n.a.	2.22482	n.a.		n.a.	n.a.
	133	32.32	n.a.	1.79493	n.a.		n.a.	n.a.
	134	32.5233	n.a.	1.74639	n.a.		n.a.	n.a.
	135	32.5833	n.a.	0.09555	n.a.		n.a.	n.a.
	136	32.75	n.a.	0.31201	n.a.		n.a.	n.a.
	137	33.29	n.a.	0.23199	n.a.		n.a.	n.a.
	138	33.48	n.a.	1.83735	n.a.		n.a.	n.a.
	139	33.7467	n.a.	0.06597	n.a.		n.a.	n.a.
	140	33.9333	n.a.	0.21948	n.a.		n.a.	n.a.
	141	34.4267	n.a.	1.34783	n.a.		n.a.	n.a.
	142	34.8067	n.a.	0.06397	n.a.		n.a.	n.a.
	143	35.0667	n.a.	1.90957	n.a.		n.a.	n.a.
	144	35.8967	n.a.	1.39762	n.a.		n.a.	n.a.
	145	36.3133	1,4 diCQA	0.09555	n.a.		n.a.	n.a.
	146	37.0333	n.a.	0.05518	n.a.		n.a.	n.a.
	147	37.3467	n.a.	3.68962	n.a.		n.a.	n.a.
	148	38.0433	n.a.	1.21947	n.a.		n.a.	n.a.
	149	38.4533	n.a.	0.94338	n.a.		n.a.	n.a.
	150	38.91	n.a.	3.70031	n.a.		n.a.	n.a.
	151	39.5767	n.a.	0.25735	n.a.		n.a.	n.a.
	152	40.4567	n.a.	123.98	n.a.		n.a.	n.a.
	153	40.93	3,4 diCQA	144.9	n.a.		n.a.	n.a.
	154	41.7933	n.a.	0.0004	n.a.		n.a.	n.a.
	155	42.3433	n.a.	20.3013	n.a.		n.a.	n.a.
	156	42.7967	1,5 diCQA	0.94338	n.a.		n.a.	n.a.
	157	44.12	n.a.	0.00998	n.a.		n.a.	n.a.
	158	44.2267	n.a.	0.00751	n.a.		n.a.	n.a.
	159	45.3567	3,5 diCQA	721.77	n.a.		n.a.	n.a.
	160	46.65	n.a.	55.2629	n.a.		n.a.	n.a.
	161	47.92	n.a.	0.00132	n.a.		n.a.	n.a.
	162	48.18	n.a.	1.15183	n.a.		n.a.	n.a.
	163	49.96	n.a.	2.31593	n.a.		n.a.	n.a.
	164	50.9667	n.a.	1.57016	n.a.		n.a.	n.a.
	165	51.69	n.a.	0.00451	n.a.		n.a.	n.a.
	166	52.61	n.a.	0.34128	n.a.		n.a.	n.a.
	167	52.7333	n.a.	0.00479	n.a.		n.a.	n.a.
	168	52.7967	n.a.	0.00317	n.a.		n.a.	n.a.
	169	52.85	n.a.	0.0202	n.a.		n.a.	n.a.
	170	53.28	n.a.	0.0002	n.a.		n.a.	n.a.
	171	53.4367	n.a.	0.00265	n.a.		n.a.	n.a.
	172	53.53	n.a.	0.01165	n.a.		n.a.	n.a.
	173	53.5933	n.a.	0.00227	n.a.		n.a.	n.a.
	174	53.6567	n.a.	0.0009	n.a.		n.a.	n.a.
	175	53.6933	n.a.	0.02148	n.a.		n.a.	n.a.
	176	53.84	n.a.	0.00304	n.a.		n.a.	n.a.
	177	53.8967	n.a.	0.02806	n.a.		n.a.	n.a.
	178	53.94	n.a.	0.0052	n.a.		n.a.	n.a.
	179	54.1667	n.a.	0.00873	n.a.		n.a.	n.a.
	180	54.3167	n.a.	0.00958	n.a.		n.a.	n.a.
	181	54.3833	n.a.	0.00598	n.a.		n.a.	n.a.
	182	54.4367	n.a.	0.00031	n.a.		n.a.	n.a.
	183	54.5733	n.a.	0.01272	n.a.		n.a.	n.a.
	184	54.6367	n.a.	0.01999	n.a.		n.a.	n.a.
	185	54.6967	n.a.	0.00082	n.a.		n.a.	n.a.
	186	54.9733	n.a.	0.02057	n.a.		n.a.	n.a.
	187	55.04	n.a.	0.0195	n.a.		n.a.	n.a.
	188	55.13	n.a.	0.0069	n.a.		n.a.	n.a.
	189	55.1767	n.a.	0.00642	n.a.		n.a.	n.a.
	190	55.2233	n.a.	0.00739	n.a.		n.a.	n.a.
	191	55.2767	n.a.	0.00904	n.a.		n.a.	n.a.
	192	55.3433	n.a.	0.00982	n.a.		n.a.	n.a.
	193	55.4433	n.a.	0.00579	n.a.		n.a.	n.a.
	194	55.5167	n.a.	0.00164	n.a.		n.a.	n.a.
	195	55.6233	n.a.	0.00601	n.a.		n.a.	n.a.
	196	55.71	n.a.	0.01233	n.a.		n.a.	n.a.
	197	55.7767	n.a.	0.00339	n.a.		n.a.	n.a.
	198	55.91	n.a.	0.00394	n.a.		n.a.	n.a.
	199	56.9433	4,5 diCQA	176	n.a.		n.a.	n.a.
	200	57.79	n.a.	4.14958	n.a.		n.a.	n.a.
	201	57.8933	n.a.	60.1993	n.a.		n.a.	n.a.
	202	57.9933	n.a.	0.00339	n.a.		n.a.	n.a.
	203	58.1067	n.a.	0.00339	n.a.		n.a.	n.a.
	204	58.3367	n.a.	44	n.a.		n.a.	n.a.
	205	58.52	n.a.	0.39699	n.a.		n.a.	n.a.
	206	58.6	n.a.	1.98256	n.a.		n.a.	n.a.
	207	58.7667	n.a.	21.9	n.a.		n.a.	n.a.
	208	58.8467	n.a.	0.14476	n.a.		n.a.	n.a.
	209	58.99	n.a.	4.28941	n.a.		n.a.	n.a.
	210	59.14	n.a.	0.22551	n.a.		n.a.	n.a.
	211	59.24	n.a.	6.2366	n.a.		n.a.	n.a.
	212	59.39	n.a.	0.25154	n.a.		n.a.	n.a.
	213	59.4833	n.a.	3.77971	n.a.		n.a.	n.a.
	214	59.5667	n.a.	0.09293	n.a.		n.a.	n.a.
	215	59.6	n.a.	0.89486	n.a.		n.a.	n.a.
	216	59.7267	n.a.	1.92529	n.a.		n.a.	n.a.
	217	59.8367	n.a.	0.54093	n.a.		n.a.	n.a.
	218	59.9767	n.a.	0.18488	n.a.		n.a.	n.a.
	219	60.04	n.a.	0.03824	n.a.		n.a.	n.a.
	220	60.1333	n.a.	0.17309	n.a.		n.a.	n.a.
	221	60.2467	n.a.	0.03917	n.a.		n.a.	n.a.
	222	60.2933	n.a.	0.37036	n.a.		n.a.	n.a.
	223	60.42	n.a.	0.34168	n.a.		n.a.	n.a.
	224	60.5067	n.a.	0.67513	n.a.		n.a.	n.a.
	225	60.6733	n.a.	1.05183	n.a.		n.a.	n.a.
	226	60.7867	n.a.	0.15533	n.a.		n.a.	n.a.
	227	60.88	n.a.	0.65875	n.a.		n.a.	n.a.
	228	60.9467	n.a.	2.2918	n.a.		n.a.	n.a.
	229	61.0233	n.a.	63.6729	n.a.		n.a.	n.a.
	230	61.1833	n.a.	2.30616	n.a.		n.a.	n.a.
	231	61.2567	n.a.	1.529	n.a.		n.a.	n.a.
	232	61.5567	n.a.	0.06234	n.a.		n.a.	n.a.
	233	61.6833	n.a.	0.32755	n.a.		n.a.	n.a.
	234	61.74	n.a.	0.09772	n.a.		n.a.	n.a.
	235	61.8567	n.a.	0.38617	n.a.		n.a.	n.a.
	236	61.9533	n.a.	0.05772	n.a.		n.a.	n.a.
	237	62.0867	n.a.	0.08002	n.a.		n.a.	n.a.
	238	62.1767	n.a.	0.03346	n.a.		n.a.	n.a.
	239	62.24	n.a.	0.01622	n.a.		n.a.	n.a.
	240	62.3267	n.a.	0.25781	n.a.		n.a.	n.a.
	241	62.3767	n.a.	0.02147	n.a.		n.a.	n.a.
	242	62.5567	n.a.	0.02556	n.a.		n.a.	n.a.
	243	62.6467	n.a.	0.63751	n.a.		n.a.	n.a.
	244	62.74	n.a.	16.3284	n.a.		n.a.	n.a.
	245	62.9533	n.a.	1.73053	n.a.		n.a.	n.a.
	246	63.4	n.a.	0.23762	n.a.		n.a.	n.a.
	247	64.43	n.a.	0.00934	n.a.		n.a.	n.a.
	248	64.6467	n.a.	0.00014	n.a.		n.a.	n.a.
	249	64.88	n.a.	0.0105	n.a.		n.a.	n.a.
	250	64.9567	n.a.	0.00966	n.a.		n.a.	n.a.
	251	65.1	n.a.	0.01277	n.a.		n.a.	n.a.
	252	65.24	n.a.	0.00496	n.a.		n.a.	n.a.
	253	65.4067	n.a.	0.01119	n.a.		n.a.	n.a.
	254	65.93	n.a.	0.00042	n.a.		n.a.	n.a.
	255	66.06	n.a.	0.00312	n.a.		n.a.	n.a.
	256	67.3767	n.a.	0.0053	n.a.		n.a.	n.a.
	257	67.4933	n.a.	0.00856	n.a.		n.a.	n.a.
	258	67.5633	n.a.	0.01337	n.a.		n.a.	n.a.
	259	67.62	n.a.	0.0016	n.a.		n.a.	n.a.
	260	67.6533	n.a.	0.01215	n.a.		n.a.	n.a.
	261	67.7167	n.a.	0.01425	n.a.		n.a.	n.a.
	262	67.7967	n.a.	0.01197	n.a.		n.a.	n.a.
	263	67.8667	n.a.	0.00131	n.a.		n.a.	n.a.
	264	67.96	n.a.	0.00484	n.a.		n.a.	n.a.
	265	68.11	n.a.	0.012	n.a.		n.a.	n.a.
	266	68.2	n.a.	0.00631	n.a.		n.a.	n.a.
	267	68.2867	n.a.	0.00718	n.a.		n.a.	n.a.
	268	68.38	n.a.	0.00343	n.a.		n.a.	n.a.
	269	68.5367	n.a.	0.00681	n.a.		n.a.	n.a.
	270	68.6367	n.a.	0.00527	n.a.		n.a.	n.a.
	271	68.7	n.a.	0.00814	n.a.		n.a.	n.a.
	272	68.7667	n.a.	0.01211	n.a.		n.a.	n.a.
	273	68.8267	n.a.	0.01143	n.a.		n.a.	n.a.
	274	68.8933	n.a.	0.00591	n.a.		n.a.	n.a.
	275	68.9767	n.a.	0.00126	n.a.		n.a.	n.a.
	276	69.05	n.a.	0.00533	n.a.		n.a.	n.a.
	277	69.1333	n.a.	0.01441	n.a.		n.a.	n.a.
	278	69.19	n.a.	0.00953	n.a.		n.a.	n.a.
	279	69.2133	n.a.	0.00937	n.a.		n.a.	n.a.
	280	69.2767	n.a.	0.00338	n.a.		n.a.	n.a.
	281	69.32	n.a.	0.00271	n.a.		n.a.	n.a.
	282	69.35	n.a.	0.00033	n.a.		n.a.	n.a.
	283	69.3933	n.a.	0.00199	n.a.		n.a.	n.a.
	284	69.4433	n.a.	0.00388	n.a.		n.a.	n.a.
	285	69.52	n.a.	0.00065	n.a.		n.a.	n.a.
	286	69.5467	n.a.	0.00262	n.a.		n.a.	n.a.
	287	69.6533	n.a.	0.00413	n.a.		n.a.	n.a.
	288	69.73	n.a.	0.00245	n.a.		n.a.	n.a.
	289	69.84	n.a.	0.00934	n.a.		n.a.	n.a.
	290	69.9067	n.a.	0.00342	n.a.		n.a.	n.a.
	291	69.94	n.a.	0.00401	n.a.		n.a.	n.a.
	Total:			2440.87				n.a.

## Sheet: Stevia 1
	Sample Name:		Stevia 1			Injection Volume:		10
	Vial Number:		GC2			Channel:		UV_VIS_1
	Sample Type:		unknown			Wavelength:		320.0
	Control Program:		20200611 CQAs 1_5mlmin-1 70min			Bandwidth:		4
	Quantif. Method:		20200611 CQAs 1_5mlmin-1 70min			Dilution Factor:		1
	Recording Time:		2020-10-21 22:19:30			Sample Weight:		1
	Run Time (min):		70			Sample Amount:		1
	No.	Ret.Time	Peak Name	Height	Spectrum Name		Lib.Name	Match
		min		mAU	in Library			with Lib
	1	0.116667	n.a.	0.02216	n.a.		n.a.	n.a.
	2	0.153333	n.a.	0.00432	n.a.		n.a.	n.a.
	3	0.32	n.a.	0.00951	n.a.		n.a.	n.a.
	4	0.4	n.a.	0.01007	n.a.		n.a.	n.a.
	5	0.483333	n.a.	0.01176	n.a.		n.a.	n.a.
	6	0.556667	n.a.	0.0016	n.a.		n.a.	n.a.
	7	0.63	n.a.	0.01043	n.a.		n.a.	n.a.
	8	0.7	n.a.	0.00681	n.a.		n.a.	n.a.
	9	0.766667	n.a.	12	n.a.		n.a.	n.a.
	10	0.8	n.a.	0.00239	n.a.		n.a.	n.a.
	11	0.876667	n.a.	0.00819	n.a.		n.a.	n.a.
	12	0.923333	n.a.	0.00864	n.a.		n.a.	n.a.
	13	0.99	n.a.	0.00143	n.a.		n.a.	n.a.
	14	1.03667	n.a.	0.01349	n.a.		n.a.	n.a.
	15	1.07333	n.a.	0.01479	n.a.		n.a.	n.a.
	16	1.15333	n.a.	0.00103	n.a.		n.a.	n.a.
	17	1.31	n.a.	11	n.a.		n.a.	n.a.
	18	1.37667	n.a.	0.06512	n.a.		n.a.	n.a.
	19	1.48333	n.a.	0.24689	n.a.		n.a.	n.a.
	20	1.56333	n.a.	0.46228	n.a.		n.a.	n.a.
	21	1.62	n.a.	0.39838	n.a.		n.a.	n.a.
	22	1.73333	n.a.	15	n.a.		n.a.	n.a.
	23	1.83667	n.a.	13.9002	n.a.		n.a.	n.a.
	24	1.96	n.a.	0.1384	n.a.		n.a.	n.a.
	25	2.09	n.a.	0.73434	n.a.		n.a.	n.a.
	26	2.29333	n.a.	0.12779	n.a.		n.a.	n.a.
	27	2.44	n.a.	0.01515	n.a.		n.a.	n.a.
	28	2.47333	n.a.	0.00104	n.a.		n.a.	n.a.
	29	2.54333	n.a.	0.01419	n.a.		n.a.	n.a.
	30	2.59333	n.a.	0.01355	n.a.		n.a.	n.a.
	31	2.66	n.a.	0.00371	n.a.		n.a.	n.a.
	32	2.68667	n.a.	0.00049	n.a.		n.a.	n.a.
	33	2.83333	n.a.	0.04189	n.a.		n.a.	n.a.
	34	3.11	n.a.	0.12023	n.a.		n.a.	n.a.
	35	3.72	n.a.	0.0835	n.a.		n.a.	n.a.
	36	4.00667	n.a.	0.0026	n.a.		n.a.	n.a.
	37	4.14	n.a.	0.01112	n.a.		n.a.	n.a.
	38	4.26667	n.a.	0.00426	n.a.		n.a.	n.a.
	39	4.39	n.a.	0.01154	n.a.		n.a.	n.a.
	40	4.57333	n.a.	0.01705	n.a.		n.a.	n.a.
	41	4.61667	1-CQA	0.00426	n.a.		n.a.	n.a.
	42	5.66333	n.a.	0.01154	n.a.		n.a.	n.a.
	43	6.77667	n.a.	0.00324	n.a.		n.a.	n.a.
	44	7.94667	3-CQA	36.8	n.a.		n.a.	n.a.
	45	9.11667	n.a.	0.00324	n.a.		n.a.	n.a.
	46	9.20667	n.a.	0.00505	n.a.		n.a.	n.a.
	47	9.32667	n.a.	0.00392	n.a.		n.a.	n.a.
	48	9.40333	n.a.	0.0029	n.a.		n.a.	n.a.
	49	9.47	n.a.	0.0038	n.a.		n.a.	n.a.
	50	9.57667	n.a.	0.01504	n.a.		n.a.	n.a.
	51	9.68333	n.a.	0.01985	n.a.		n.a.	n.a.
	52	9.72667	n.a.	0.0034	n.a.		n.a.	n.a.
	53	9.95	n.a.	0.00603	n.a.		n.a.	n.a.
	54	10.6933	n.a.	0.37577	n.a.		n.a.	n.a.
	55	10.99	n.a.	0.30478	n.a.		n.a.	n.a.
	56	11.3833	n.a.	0.01043	n.a.		n.a.	n.a.
	57	11.45	n.a.	0.00643	n.a.		n.a.	n.a.
	58	11.64	n.a.	0.00488	n.a.		n.a.	n.a.
	59	11.6967	n.a.	0.01123	n.a.		n.a.	n.a.
	60	11.8067	n.a.	0.02873	n.a.		n.a.	n.a.
	61	12.5433	n.a.	0.32992	n.a.		n.a.	n.a.
	62	12.9367	n.a.	0.01324	n.a.		n.a.	n.a.
	63	13.0467	n.a.	0.00557	n.a.		n.a.	n.a.
	64	13.1133	n.a.	0.00197	n.a.		n.a.	n.a.
	65	13.1867	n.a.	0.00555	n.a.		n.a.	n.a.
	66	13.2567	n.a.	0.00381	n.a.		n.a.	n.a.
	67	13.3867	n.a.	0.00927	n.a.		n.a.	n.a.
	68	13.55	n.a.	0.00729	n.a.		n.a.	n.a.
	69	13.7067	n.a.	0.00786	n.a.		n.a.	n.a.
	70	13.8133	n.a.	0.00552	n.a.		n.a.	n.a.
	71	13.8633	n.a.	0.00622	n.a.		n.a.	n.a.
	72	14.0833	n.a.	0.00958	n.a.		n.a.	n.a.
	73	14.2433	n.a.	0.00927	n.a.		n.a.	n.a.
	74	14.32	n.a.	0.01171	n.a.		n.a.	n.a.
	75	14.4033	n.a.	0.00331	n.a.		n.a.	n.a.
	76	14.5167	n.a.	0.00758	n.a.		n.a.	n.a.
	77	14.6067	n.a.	0.00507	n.a.		n.a.	n.a.
	78	14.6967	n.a.	0.00184	n.a.		n.a.	n.a.
	79	14.7433	n.a.	0.00182	n.a.		n.a.	n.a.
	80	14.7967	n.a.	0.01047	n.a.		n.a.	n.a.
	81	14.87	n.a.	0.00925	n.a.		n.a.	n.a.
	82	14.9967	n.a.	0.00562	n.a.		n.a.	n.a.
	83	15.08	n.a.	0.00696	n.a.		n.a.	n.a.
	84	15.9133	n.a.	0.76406	n.a.		n.a.	n.a.
	85	16.39	n.a.	0.12479	n.a.		n.a.	n.a.
	86	16.4533	n.a.	0.00848	n.a.		n.a.	n.a.
	87	16.7067	n.a.	0.00215	n.a.		n.a.	n.a.
	88	16.8067	n.a.	0.00715	n.a.		n.a.	n.a.
	89	16.8933	n.a.	0.02494	n.a.		n.a.	n.a.
	90	17.5967	5-CQA	300	n.a.		n.a.	n.a.
	91	18.19	n.a.	0.22119	n.a.		n.a.	n.a.
	92	18.5333	n.a.	0.28813	n.a.		n.a.	n.a.
	93	18.8967	n.a.	0.14315	n.a.		n.a.	n.a.
	94	20.8533	4-CQA	32.7	n.a.		n.a.	n.a.
	95	23.7567	n.a.	0.06456	n.a.		n.a.	n.a.
	96	23.8233	n.a.	0.00629	n.a.		n.a.	n.a.
	97	23.9267	n.a.	0.00727	n.a.		n.a.	n.a.
	98	24	n.a.	0.0056	n.a.		n.a.	n.a.
	99	24.1533	n.a.	0.0044	n.a.		n.a.	n.a.
	100	24.2633	n.a.	0.00523	n.a.		n.a.	n.a.
	101	24.3233	n.a.	0.00501	n.a.		n.a.	n.a.
	102	24.44	n.a.	0.0078	n.a.		n.a.	n.a.
	103	24.5	n.a.	0.00167	n.a.		n.a.	n.a.
	104	24.5367	n.a.	0.00914	n.a.		n.a.	n.a.
	105	24.6533	n.a.	0.01594	n.a.		n.a.	n.a.
	106	24.73	n.a.	0.0017	n.a.		n.a.	n.a.
	107	24.79	n.a.	0.0055	n.a.		n.a.	n.a.
	108	24.9033	n.a.	0.0059	n.a.		n.a.	n.a.
	109	24.95	n.a.	0.04093	n.a.		n.a.	n.a.
	110	25.1033	n.a.	0.00316	n.a.		n.a.	n.a.
	111	25.1667	n.a.	0.00386	n.a.		n.a.	n.a.
	112	25.26	n.a.	0.01501	n.a.		n.a.	n.a.
	113	25.6167	n.a.	0.1395	n.a.		n.a.	n.a.
	114	25.9067	n.a.	0.19557	n.a.		n.a.	n.a.
	115	26.3033	n.a.	0.00384	n.a.		n.a.	n.a.
	116	26.54	n.a.	0.09131	n.a.		n.a.	n.a.
	117	26.57	n.a.	0.00346	n.a.		n.a.	n.a.
	118	27.0533	n.a.	6.52146	n.a.		n.a.	n.a.
	119	27.5767	n.a.	0.63631	n.a.		n.a.	n.a.
	120	27.98	n.a.	0.84296	n.a.		n.a.	n.a.
	121	28.2233	Puerarin	400.87	n.a.		n.a.	n.a.
	122	28.6633	n.a.	1.25929	n.a.		n.a.	n.a.
	123	28.9733	n.a.	6.7933	n.a.		n.a.	n.a.
	124	29.2567	n.a.	0.11938	n.a.		n.a.	n.a.
	125	29.5767	n.a.	0.72418	n.a.		n.a.	n.a.
	126	30.1233	n.a.	2.32104	n.a.		n.a.	n.a.
	127	30.4067	n.a.	0.11891	n.a.		n.a.	n.a.
	128	30.6533	1,3-diCQA	0.11938	n.a.		n.a.	n.a.
	129	31.11	n.a.	0.30755	n.a.		n.a.	n.a.
	130	31.3667	n.a.	4.2455	n.a.		n.a.	n.a.
	131	31.7933	n.a.	0.54235	n.a.		n.a.	n.a.
	132	32.11	n.a.	2.22482	n.a.		n.a.	n.a.
	133	32.32	n.a.	1.79493	n.a.		n.a.	n.a.
	134	32.5233	n.a.	1.74639	n.a.		n.a.	n.a.
	135	32.5833	n.a.	0.09555	n.a.		n.a.	n.a.
	136	32.75	n.a.	0.31201	n.a.		n.a.	n.a.
	137	33.29	n.a.	0.23199	n.a.		n.a.	n.a.
	138	33.48	n.a.	1.83735	n.a.		n.a.	n.a.
	139	33.7467	n.a.	0.06597	n.a.		n.a.	n.a.
	140	33.9333	n.a.	0.21948	n.a.		n.a.	n.a.
	141	34.4267	n.a.	1.34783	n.a.		n.a.	n.a.
	142	34.8067	n.a.	0.06397	n.a.		n.a.	n.a.
	143	35.0667	n.a.	1.90957	n.a.		n.a.	n.a.
	144	35.8967	n.a.	1.39762	n.a.		n.a.	n.a.
	145	36.3133	1,4 diCQA	0.09555	n.a.		n.a.	n.a.
	146	37.0333	n.a.	0.05518	n.a.		n.a.	n.a.
	147	37.3467	n.a.	3.68962	n.a.		n.a.	n.a.
	148	38.0433	n.a.	1.21947	n.a.		n.a.	n.a.
	149	38.4533	n.a.	0.94338	n.a.		n.a.	n.a.
	150	38.91	n.a.	3.70031	n.a.		n.a.	n.a.
	151	39.5767	n.a.	0.25735	n.a.		n.a.	n.a.
	152	40.4567	n.a.	123.98	n.a.		n.a.	n.a.
	153	40.93	3,4 diCQA	140.8	n.a.		n.a.	n.a.
	154	41.7933	n.a.	0.0004	n.a.		n.a.	n.a.
	155	42.3433	n.a.	20.3013	n.a.		n.a.	n.a.
	156	42.7967	1,5 diCQA	0.94338	n.a.		n.a.	n.a.
	157	44.12	n.a.	0.00998	n.a.		n.a.	n.a.
	158	44.2267	n.a.	0.00751	n.a.		n.a.	n.a.
	159	45.3567	3,5 diCQA	490	n.a.		n.a.	n.a.
	160	46.65	n.a.	55.2629	n.a.		n.a.	n.a.
	161	47.92	n.a.	0.00132	n.a.		n.a.	n.a.
	162	48.18	n.a.	1.15183	n.a.		n.a.	n.a.
	163	49.96	n.a.	2.31593	n.a.		n.a.	n.a.
	164	50.9667	n.a.	1.57016	n.a.		n.a.	n.a.
	165	51.69	n.a.	0.00451	n.a.		n.a.	n.a.
	166	52.61	n.a.	0.34128	n.a.		n.a.	n.a.
	167	52.7333	n.a.	0.00479	n.a.		n.a.	n.a.
	168	52.7967	n.a.	0.00317	n.a.		n.a.	n.a.
	169	52.85	n.a.	0.0202	n.a.		n.a.	n.a.
	170	53.28	n.a.	0.0002	n.a.		n.a.	n.a.
	171	53.4367	n.a.	0.00265	n.a.		n.a.	n.a.
	172	53.53	n.a.	0.01165	n.a.		n.a.	n.a.
	173	53.5933	n.a.	0.00227	n.a.		n.a.	n.a.
	174	53.6567	n.a.	0.0009	n.a.		n.a.	n.a.
	175	53.6933	n.a.	0.02148	n.a.		n.a.	n.a.
	176	53.84	n.a.	0.00304	n.a.		n.a.	n.a.
	177	53.8967	n.a.	0.02806	n.a.		n.a.	n.a.
	178	53.94	n.a.	0.0052	n.a.		n.a.	n.a.
	179	54.1667	n.a.	0.00873	n.a.		n.a.	n.a.
	180	54.3167	n.a.	0.00958	n.a.		n.a.	n.a.
	181	54.3833	n.a.	0.00598	n.a.		n.a.	n.a.
	182	54.4367	n.a.	0.00031	n.a.		n.a.	n.a.
	183	54.5733	n.a.	0.01272	n.a.		n.a.	n.a.
	184	54.6367	n.a.	0.01999	n.a.		n.a.	n.a.
	185	54.6967	n.a.	0.00082	n.a.		n.a.	n.a.
	186	54.9733	n.a.	0.02057	n.a.		n.a.	n.a.
	187	55.04	n.a.	0.0195	n.a.		n.a.	n.a.
	188	55.13	n.a.	0.0069	n.a.		n.a.	n.a.
	189	55.1767	n.a.	0.00642	n.a.		n.a.	n.a.
	190	55.2233	n.a.	0.00739	n.a.		n.a.	n.a.
	191	55.2767	n.a.	0.00904	n.a.		n.a.	n.a.
	192	55.3433	n.a.	0.00982	n.a.		n.a.	n.a.
	193	55.4433	n.a.	0.00579	n.a.		n.a.	n.a.
	194	55.5167	n.a.	0.00164	n.a.		n.a.	n.a.
	195	55.6233	n.a.	0.00601	n.a.		n.a.	n.a.
	196	55.71	n.a.	0.01233	n.a.		n.a.	n.a.
	197	55.7767	n.a.	0.00339	n.a.		n.a.	n.a.
	198	55.91	n.a.	0.00394	n.a.		n.a.	n.a.
	199	56.9433	4,5 diCQA	120.6	n.a.		n.a.	n.a.
	200	57.79	n.a.	4.14958	n.a.		n.a.	n.a.
	201	57.8933	n.a.	60.1993	n.a.		n.a.	n.a.
	202	57.9933	n.a.	0.00339	n.a.		n.a.	n.a.
	203	58.1067	n.a.	0.00339	n.a.		n.a.	n.a.
	204	58.3367	n.a.	0	n.a.		n.a.	n.a.
	205	58.52	n.a.	0.39699	n.a.		n.a.	n.a.
	206	58.6	n.a.	1.98256	n.a.		n.a.	n.a.
	207	58.7667	n.a.	21.9	n.a.		n.a.	n.a.
	208	58.8467	n.a.	0.14476	n.a.		n.a.	n.a.
	209	58.99	n.a.	4.28941	n.a.		n.a.	n.a.
	210	59.14	n.a.	0.22551	n.a.		n.a.	n.a.
	211	59.24	n.a.	6.2366	n.a.		n.a.	n.a.
	212	59.39	n.a.	0.25154	n.a.		n.a.	n.a.
	213	59.4833	n.a.	3.77971	n.a.		n.a.	n.a.
	214	59.5667	n.a.	0.09293	n.a.		n.a.	n.a.
	215	59.6	n.a.	0.89486	n.a.		n.a.	n.a.
	216	59.7267	n.a.	13	n.a.		n.a.	n.a.
	217	59.8367	n.a.	0.54093	n.a.		n.a.	n.a.
	218	59.9767	n.a.	0.18488	n.a.		n.a.	n.a.
	219	60.04	n.a.	0.03824	n.a.		n.a.	n.a.
	220	60.1333	n.a.	0.17309	n.a.		n.a.	n.a.
	221	60.2467	n.a.	0.03917	n.a.		n.a.	n.a.
	222	60.2933	n.a.	0.37036	n.a.		n.a.	n.a.
	223	60.42	n.a.	0.34168	n.a.		n.a.	n.a.
	224	60.5067	n.a.	0.67513	n.a.		n.a.	n.a.
	225	60.6733	n.a.	1.05183	n.a.		n.a.	n.a.
	226	60.7867	n.a.	0.15533	n.a.		n.a.	n.a.
	227	60.88	n.a.	0.65875	n.a.		n.a.	n.a.
	228	60.9467	n.a.	44	n.a.		n.a.	n.a.
	229	61.0233	n.a.	63.6729	n.a.		n.a.	n.a.
	230	61.1833	n.a.	2.30616	n.a.		n.a.	n.a.
	231	61.2567	n.a.	1.529	n.a.		n.a.	n.a.
	232	61.5567	n.a.	0.06234	n.a.		n.a.	n.a.
	233	61.6833	n.a.	0.32755	n.a.		n.a.	n.a.
	234	61.74	n.a.	0.09772	n.a.		n.a.	n.a.
	235	61.8567	n.a.	0.38617	n.a.		n.a.	n.a.
	236	61.9533	n.a.	0.05772	n.a.		n.a.	n.a.
	237	62.0867	n.a.	0.08002	n.a.		n.a.	n.a.
	238	62.1767	n.a.	0.03346	n.a.		n.a.	n.a.
	239	62.24	n.a.	0.01622	n.a.		n.a.	n.a.
	240	62.3267	n.a.	0.25781	n.a.		n.a.	n.a.
	241	62.3767	n.a.	0.02147	n.a.		n.a.	n.a.
	242	62.5567	n.a.	0.02556	n.a.		n.a.	n.a.
	243	62.6467	n.a.	16	n.a.		n.a.	n.a.
	244	62.74	n.a.	16.3284	n.a.		n.a.	n.a.
	245	62.9533	n.a.	1.73053	n.a.		n.a.	n.a.
	246	63.4	n.a.	18	n.a.		n.a.	n.a.
	247	64.43	n.a.	0.00934	n.a.		n.a.	n.a.
	248	64.6467	n.a.	0.00014	n.a.		n.a.	n.a.
	249	64.88	n.a.	0.0105	n.a.		n.a.	n.a.
	250	64.9567	n.a.	0.00966	n.a.		n.a.	n.a.
	251	65.1	n.a.	0.01277	n.a.		n.a.	n.a.
	252	65.24	n.a.	0.00496	n.a.		n.a.	n.a.
	253	65.4067	n.a.	0.01119	n.a.		n.a.	n.a.
	254	65.93	n.a.	0.00042	n.a.		n.a.	n.a.
	255	66.06	n.a.	0.00312	n.a.		n.a.	n.a.
	256	67.3767	n.a.	0.0053	n.a.		n.a.	n.a.
	257	67.4933	n.a.	0.00856	n.a.		n.a.	n.a.
	258	67.5633	n.a.	0.01337	n.a.		n.a.	n.a.
	259	67.62	n.a.	0.0016	n.a.		n.a.	n.a.
	260	67.6533	n.a.	0.01215	n.a.		n.a.	n.a.
	261	67.7167	n.a.	0.01425	n.a.		n.a.	n.a.
	262	67.7967	n.a.	0.01197	n.a.		n.a.	n.a.
	263	67.8667	n.a.	0.00131	n.a.		n.a.	n.a.
	264	67.96	n.a.	0.00484	n.a.		n.a.	n.a.
	265	68.11	n.a.	0.012	n.a.		n.a.	n.a.
	266	68.2	n.a.	0.00631	n.a.		n.a.	n.a.
	267	68.2867	n.a.	0.00718	n.a.		n.a.	n.a.
	268	68.38	n.a.	0.00343	n.a.		n.a.	n.a.
	269	68.5367	n.a.	0.00681	n.a.		n.a.	n.a.
	270	68.6367	n.a.	0.00527	n.a.		n.a.	n.a.
	271	68.7	n.a.	0.00814	n.a.		n.a.	n.a.
	272	68.7667	n.a.	0.01211	n.a.		n.a.	n.a.
	273	68.8267	n.a.	0.01143	n.a.		n.a.	n.a.
	274	68.8933	n.a.	0.00591	n.a.		n.a.	n.a.
	275	68.9767	n.a.	0.00126	n.a.		n.a.	n.a.
	276	69.05	n.a.	0.00533	n.a.		n.a.	n.a.
	277	69.1333	n.a.	0.01441	n.a.		n.a.	n.a.
	278	69.19	n.a.	0.00953	n.a.		n.a.	n.a.
	279	69.2133	n.a.	0.00937	n.a.		n.a.	n.a.
	280	69.2767	n.a.	0.00338	n.a.		n.a.	n.a.
	281	69.32	n.a.	0.00271	n.a.		n.a.	n.a.
	282	69.35	n.a.	0.00033	n.a.		n.a.	n.a.
	283	69.3933	n.a.	0.00199	n.a.		n.a.	n.a.
	284	69.4433	n.a.	0.00388	n.a.		n.a.	n.a.
	285	69.52	n.a.	0.00065	n.a.		n.a.	n.a.
	286	69.5467	n.a.	0.00262	n.a.		n.a.	n.a.
	287	69.6533	n.a.	0.00413	n.a.		n.a.	n.a.
	288	69.73	n.a.	0.00245	n.a.		n.a.	n.a.
	289	69.84	n.a.	0.00934	n.a.		n.a.	n.a.
	290	69.9067	n.a.	0.00342	n.a.		n.a.	n.a.
	291	69.94	n.a.	0.00401	n.a.		n.a.	n.a.
	Total:			2120.77				n.a.

## Sheet: Pluchea 1
	Sample Name:		Pluchea indica 1			Injection Volume:		10
	Vial Number:		GC4			Channel:		UV_VIS_1
	Sample Type:		unknown			Wavelength:		320.0
	Control Program:		20200611 CQAs 1_5mlmin-1 70min			Bandwidth:		4
	Quantif. Method:		20200611 CQAs 1_5mlmin-1 70min			Dilution Factor:		1
	Recording Time:		2020-10-21 22:19:30			Sample Weight:		1
	Run Time (min):		70			Sample Amount:		1
	No.	Ret.Time	Peak Name	Height	Spectrum Name		Lib.Name	Match
		min		mAU	in Library			with Lib
	1	0.116667	n.a.	0.02216	n.a.		n.a.	n.a.
	2	0.153333	n.a.	0.00432	n.a.		n.a.	n.a.
	3	0.32	n.a.	0.00951	n.a.		n.a.	n.a.
	4	0.4	n.a.	0.01007	n.a.		n.a.	n.a.
	5	0.483333	n.a.	0.01176	n.a.		n.a.	n.a.
	6	0.556667	n.a.	0.0016	n.a.		n.a.	n.a.
	7	0.63	n.a.	0.01043	n.a.		n.a.	n.a.
	8	0.7	n.a.	0.00681	n.a.		n.a.	n.a.
	9	0.766667	n.a.	0.00099	n.a.		n.a.	n.a.
	10	0.8	n.a.	0.00239	n.a.		n.a.	n.a.
	11	0.876667	n.a.	0.00819	n.a.		n.a.	n.a.
	12	0.923333	n.a.	0.00864	n.a.		n.a.	n.a.
	13	0.99	n.a.	0.00143	n.a.		n.a.	n.a.
	14	1.03667	n.a.	0.01349	n.a.		n.a.	n.a.
	15	1.07333	n.a.	0.01479	n.a.		n.a.	n.a.
	16	1.15333	n.a.	0.00103	n.a.		n.a.	n.a.
	17	1.31	n.a.	0.05742	n.a.		n.a.	n.a.
	18	1.37667	n.a.	0.06512	n.a.		n.a.	n.a.
	19	1.48333	n.a.	12.7	n.a.		n.a.	n.a.
	20	1.56333	n.a.	0	n.a.		n.a.	n.a.
	21	1.62	n.a.	0.39838	n.a.		n.a.	n.a.
	22	1.73333	n.a.	1.19868	n.a.		n.a.	n.a.
	23	1.83667	n.a.	13.9002	n.a.		n.a.	n.a.
	24	1.96	n.a.	0.1384	n.a.		n.a.	n.a.
	25	2.09	n.a.	10.8	n.a.		n.a.	n.a.
	26	2.29333	n.a.	0.12779	n.a.		n.a.	n.a.
	27	2.44	n.a.	0.01515	n.a.		n.a.	n.a.
	28	2.47333	n.a.	0.00104	n.a.		n.a.	n.a.
	29	2.54333	n.a.	0	n.a.		n.a.	n.a.
	30	2.59333	n.a.	0	n.a.		n.a.	n.a.
	31	2.66	n.a.	0.00371	n.a.		n.a.	n.a.
	32	2.68667	n.a.	0.00049	n.a.		n.a.	n.a.
	33	2.83333	n.a.	0.04189	n.a.		n.a.	n.a.
	34	3.11	n.a.	0.12023	n.a.		n.a.	n.a.
	35	3.72	n.a.	0.0835	n.a.		n.a.	n.a.
	36	4.00667	n.a.	0.0026	n.a.		n.a.	n.a.
	37	4.14	n.a.	0.01112	n.a.		n.a.	n.a.
	38	4.26667	n.a.	0.00426	n.a.		n.a.	n.a.
	39	4.39	n.a.	0.01154	n.a.		n.a.	n.a.
	40	4.57333	n.a.	0.01705	n.a.		n.a.	n.a.
	41	4.61667	1-CQA	0.00426	n.a.		n.a.	n.a.
	42	5.66333	n.a.	0.01154	n.a.		n.a.	n.a.
	43	6.77667	n.a.	0.00324	n.a.		n.a.	n.a.
	44	7.94667	3-CQA	8.9	n.a.		n.a.	n.a.
	45	9.11667	n.a.	0.00324	n.a.		n.a.	n.a.
	46	9.20667	n.a.	0.00505	n.a.		n.a.	n.a.
	47	9.32667	n.a.	0.00392	n.a.		n.a.	n.a.
	48	9.40333	n.a.	0.0029	n.a.		n.a.	n.a.
	49	9.47	n.a.	0.0038	n.a.		n.a.	n.a.
	50	9.57667	n.a.	0.01504	n.a.		n.a.	n.a.
	51	9.68333	n.a.	0.01985	n.a.		n.a.	n.a.
	52	9.72667	n.a.	0.0034	n.a.		n.a.	n.a.
	53	9.95	n.a.	0.00603	n.a.		n.a.	n.a.
	54	10.6933	n.a.	0.37577	n.a.		n.a.	n.a.
	55	10.99	n.a.	0.30478	n.a.		n.a.	n.a.
	56	11.3833	n.a.	0.01043	n.a.		n.a.	n.a.
	57	11.45	n.a.	0.00643	n.a.		n.a.	n.a.
	58	11.64	n.a.	0.00488	n.a.		n.a.	n.a.
	59	11.6967	n.a.	0.01123	n.a.		n.a.	n.a.
	60	11.8067	n.a.	0.02873	n.a.		n.a.	n.a.
	61	12.5433	n.a.	0.32992	n.a.		n.a.	n.a.
	62	12.9367	n.a.	0.01324	n.a.		n.a.	n.a.
	63	13.0467	n.a.	0.00557	n.a.		n.a.	n.a.
	64	13.1133	n.a.	0.00197	n.a.		n.a.	n.a.
	65	13.1867	n.a.	0.00555	n.a.		n.a.	n.a.
	66	13.2567	n.a.	0.00381	n.a.		n.a.	n.a.
	67	13.3867	n.a.	0.00927	n.a.		n.a.	n.a.
	68	13.55	n.a.	0.00729	n.a.		n.a.	n.a.
	69	13.7067	n.a.	0	n.a.		n.a.	n.a.
	70	13.8133	n.a.	0.00552	n.a.		n.a.	n.a.
	71	13.8633	n.a.	0.00622	n.a.		n.a.	n.a.
	72	14.0833	n.a.	0.00958	n.a.		n.a.	n.a.
	73	14.2433	n.a.	0.00927	n.a.		n.a.	n.a.
	74	14.32	n.a.	0	n.a.		n.a.	n.a.
	75	14.4033	n.a.	0.00331	n.a.		n.a.	n.a.
	76	14.5167	n.a.	0.00758	n.a.		n.a.	n.a.
	77	14.6067	n.a.	0.00507	n.a.		n.a.	n.a.
	78	14.6967	n.a.	0.00184	n.a.		n.a.	n.a.
	79	14.7433	n.a.	0	n.a.		n.a.	n.a.
	80	14.7967	n.a.	0.01047	n.a.		n.a.	n.a.
	81	14.87	n.a.	0.00925	n.a.		n.a.	n.a.
	82	14.9967	n.a.	0.00562	n.a.		n.a.	n.a.
	83	15.08	n.a.	0.00696	n.a.		n.a.	n.a.
	84	15.9133	n.a.	0.76406	n.a.		n.a.	n.a.
	85	16.39	n.a.	0.12479	n.a.		n.a.	n.a.
	86	16.4533	n.a.	0.00848	n.a.		n.a.	n.a.
	87	16.7067	n.a.	0.00215	n.a.		n.a.	n.a.
	88	16.8067	n.a.	0.00715	n.a.		n.a.	n.a.
	89	16.8933	n.a.	0.02494	n.a.		n.a.	n.a.
	90	17.5967	5-CQA	376.8	n.a.		n.a.	n.a.
	91	18.19	n.a.	0.22119	n.a.		n.a.	n.a.
	92	18.5333	n.a.	0.28813	n.a.		n.a.	n.a.
	93	18.8967	n.a.	0.14315	n.a.		n.a.	n.a.
	94	20.8533	4-CQA	0	n.a.		n.a.	n.a.
	95	23.7567	n.a.	0.06456	n.a.		n.a.	n.a.
	96	23.8233	n.a.	0.00629	n.a.		n.a.	n.a.
	97	23.9267	n.a.	0.00727	n.a.		n.a.	n.a.
	98	24	n.a.	0.0056	n.a.		n.a.	n.a.
	99	24.1533	n.a.	0.0044	n.a.		n.a.	n.a.
	100	24.2633	n.a.	0.00523	n.a.		n.a.	n.a.
	101	24.3233	n.a.	0.00501	n.a.		n.a.	n.a.
	102	24.44	n.a.	0.0078	n.a.		n.a.	n.a.
	103	24.5	n.a.	0.00167	n.a.		n.a.	n.a.
	104	24.5367	n.a.	0.00914	n.a.		n.a.	n.a.
	105	24.6533	n.a.	0.01594	n.a.		n.a.	n.a.
	106	24.73	n.a.	0.0017	n.a.		n.a.	n.a.
	107	24.79	n.a.	0.0055	n.a.		n.a.	n.a.
	108	24.9033	n.a.	0.0059	n.a.		n.a.	n.a.
	109	24.95	n.a.	0.04093	n.a.		n.a.	n.a.
	110	25.1033	n.a.	0.00316	n.a.		n.a.	n.a.
	111	25.1667	n.a.	0.00386	n.a.		n.a.	n.a.
	112	25.26	n.a.	0.01501	n.a.		n.a.	n.a.
	113	25.6167	n.a.	0.1395	n.a.		n.a.	n.a.
	114	25.9067	n.a.	0	n.a.		n.a.	n.a.
	115	26.3033	n.a.	0.00384	n.a.		n.a.	n.a.
	116	26.54	n.a.	0.09131	n.a.		n.a.	n.a.
	117	26.57	n.a.	0.00346	n.a.		n.a.	n.a.
	118	27.0533	n.a.	0	n.a.		n.a.	n.a.
	119	27.5767	n.a.	0.63631	n.a.		n.a.	n.a.
	120	27.98	n.a.	0.84296	n.a.		n.a.	n.a.
	121	28.2233	Puerarin	400.87	n.a.		n.a.	n.a.
	122	28.6633	n.a.	1.25929	n.a.		n.a.	n.a.
	123	28.9733	n.a.	0	n.a.		n.a.	n.a.
	124	29.2567	n.a.	0.11938	n.a.		n.a.	n.a.
	125	29.5767	n.a.	0.72418	n.a.		n.a.	n.a.
	126	30.1233	n.a.	2.32104	n.a.		n.a.	n.a.
	127	30.4067	n.a.	0.11891	n.a.		n.a.	n.a.
	128	30.6533	1,3-diCQA	0.11938	n.a.		n.a.	n.a.
	129	31.11	n.a.	0.30755	n.a.		n.a.	n.a.
	130	31.3667	n.a.	4.2455	n.a.		n.a.	n.a.
	131	31.7933	n.a.	0.54235	n.a.		n.a.	n.a.
	132	32.11	n.a.	2.22482	n.a.		n.a.	n.a.
	133	32.32	n.a.	1.79493	n.a.		n.a.	n.a.
	134	32.5233	n.a.	1.74639	n.a.		n.a.	n.a.
	135	32.5833	n.a.	0.09555	n.a.		n.a.	n.a.
	136	32.75	n.a.	0.31201	n.a.		n.a.	n.a.
	137	33.29	n.a.	0.23199	n.a.		n.a.	n.a.
	138	33.48	n.a.	1.83735	n.a.		n.a.	n.a.
	139	33.7467	n.a.	0.06597	n.a.		n.a.	n.a.
	140	33.9333	n.a.	0.21948	n.a.		n.a.	n.a.
	141	34.4267	n.a.	1.34783	n.a.		n.a.	n.a.
	142	34.8067	n.a.	0.06397	n.a.		n.a.	n.a.
	143	35.0667	n.a.	1.90957	n.a.		n.a.	n.a.
	144	35.8967	n.a.	1.39762	n.a.		n.a.	n.a.
	145	36.3133	1,4 diCQA	0.09555	n.a.		n.a.	n.a.
	146	37.0333	n.a.	0.05518	n.a.		n.a.	n.a.
	147	37.3467	n.a.	3.68962	n.a.		n.a.	n.a.
	148	38.0433	n.a.	1.21947	n.a.		n.a.	n.a.
	149	38.4533	n.a.	0.94338	n.a.		n.a.	n.a.
	150	38.91	n.a.	3.70031	n.a.		n.a.	n.a.
	151	39.5767	n.a.	0.25735	n.a.		n.a.	n.a.
	152	40.4567	n.a.	123.98	n.a.		n.a.	n.a.
	153	40.93	3,4 diCQA	65.9	n.a.		n.a.	n.a.
	154	41.7933	n.a.	0.0004	n.a.		n.a.	n.a.
	155	42.3433	n.a.	20.3013	n.a.		n.a.	n.a.
	156	42.7967	1,5 diCQA	0.94338	n.a.		n.a.	n.a.
	157	44.12	n.a.	0.00998	n.a.		n.a.	n.a.
	158	44.2267	n.a.	0.00751	n.a.		n.a.	n.a.
	159	45.3567	3,5 diCQA	499	n.a.		n.a.	n.a.
	160	46.65	n.a.	33	n.a.		n.a.	n.a.
	161	47.92	n.a.	0.00132	n.a.		n.a.	n.a.
	162	48.18	n.a.	1.15183	n.a.		n.a.	n.a.
	163	49.96	n.a.	2.31593	n.a.		n.a.	n.a.
	164	50.9667	n.a.	1.57016	n.a.		n.a.	n.a.
	165	51.69	n.a.	0.00451	n.a.		n.a.	n.a.
	166	52.61	n.a.	0.34128	n.a.		n.a.	n.a.
	167	52.7333	n.a.	0.00479	n.a.		n.a.	n.a.
	168	52.7967	n.a.	0.00317	n.a.		n.a.	n.a.
	169	52.85	n.a.	0.0202	n.a.		n.a.	n.a.
	170	53.28	n.a.	0.0002	n.a.		n.a.	n.a.
	171	53.4367	n.a.	0.00265	n.a.		n.a.	n.a.
	172	53.53	n.a.	0.01165	n.a.		n.a.	n.a.
	173	53.5933	n.a.	0.00227	n.a.		n.a.	n.a.
	174	53.6567	n.a.	0.0009	n.a.		n.a.	n.a.
	175	53.6933	n.a.	0.02148	n.a.		n.a.	n.a.
	176	53.84	n.a.	0.00304	n.a.		n.a.	n.a.
	177	53.8967	n.a.	0.02806	n.a.		n.a.	n.a.
	178	53.94	n.a.	0.0052	n.a.		n.a.	n.a.
	179	54.1667	n.a.	0.00873	n.a.		n.a.	n.a.
	180	54.3167	n.a.	0.00958	n.a.		n.a.	n.a.
	181	54.3833	n.a.	0.00598	n.a.		n.a.	n.a.
	182	54.4367	n.a.	0.00031	n.a.		n.a.	n.a.
	183	54.5733	n.a.	0.01272	n.a.		n.a.	n.a.
	184	54.6367	n.a.	0.01999	n.a.		n.a.	n.a.
	185	54.6967	n.a.	0.00082	n.a.		n.a.	n.a.
	186	54.9733	n.a.	0.02057	n.a.		n.a.	n.a.
	187	55.04	n.a.	0.0195	n.a.		n.a.	n.a.
	188	55.13	n.a.	0.0069	n.a.		n.a.	n.a.
	189	55.1767	n.a.	0.00642	n.a.		n.a.	n.a.
	190	55.2233	n.a.	0.00739	n.a.		n.a.	n.a.
	191	55.2767	n.a.	0.00904	n.a.		n.a.	n.a.
	192	55.3433	n.a.	0.00982	n.a.		n.a.	n.a.
	193	55.4433	n.a.	0.00579	n.a.		n.a.	n.a.
	194	55.5167	n.a.	0.00164	n.a.		n.a.	n.a.
	195	55.6233	n.a.	0.00601	n.a.		n.a.	n.a.
	196	55.71	n.a.	0.01233	n.a.		n.a.	n.a.
	197	55.7767	n.a.	0.00339	n.a.		n.a.	n.a.
	198	55.91	n.a.	0.00394	n.a.		n.a.	n.a.
	199	56.9433	4,5 diCQA	78	n.a.		n.a.	n.a.
	200	57.79	n.a.	4.14958	n.a.		n.a.	n.a.
	201	57.8933	n.a.	0	n.a.		n.a.	n.a.
	202	57.9933	n.a.	0.00339	n.a.		n.a.	n.a.
	203	58.1067	n.a.	66	n.a.		n.a.	n.a.
	204	58.3367	n.a.	44	n.a.		n.a.	n.a.
	205	58.52	n.a.	0.39699	n.a.		n.a.	n.a.
	206	58.6	n.a.	1.98256	n.a.		n.a.	n.a.
	207	58.7667	n.a.	21.9	n.a.		n.a.	n.a.
	208	58.8467	n.a.	0.14476	n.a.		n.a.	n.a.
	209	58.99	n.a.	22	n.a.		n.a.	n.a.
	210	59.14	n.a.	0.22551	n.a.		n.a.	n.a.
	211	59.24	n.a.	6.2366	n.a.		n.a.	n.a.
	212	59.39	n.a.	0.25154	n.a.		n.a.	n.a.
	213	59.4833	n.a.	3.77971	n.a.		n.a.	n.a.
	214	59.5667	n.a.	0.09293	n.a.		n.a.	n.a.
	215	59.6	n.a.	0.89486	n.a.		n.a.	n.a.
	216	59.7267	n.a.	1.92529	n.a.		n.a.	n.a.
	217	59.8367	n.a.	0.54093	n.a.		n.a.	n.a.
	218	59.9767	n.a.	0.18488	n.a.		n.a.	n.a.
	219	60.04	n.a.	0.03824	n.a.		n.a.	n.a.
	220	60.1333	n.a.	0.17309	n.a.		n.a.	n.a.
	221	60.2467	n.a.	0.03917	n.a.		n.a.	n.a.
	222	60.2933	n.a.	0.37036	n.a.		n.a.	n.a.
	223	60.42	n.a.	0.34168	n.a.		n.a.	n.a.
	224	60.5067	n.a.	0.67513	n.a.		n.a.	n.a.
	225	60.6733	n.a.	1.05183	n.a.		n.a.	n.a.
	226	60.7867	n.a.	0.15533	n.a.		n.a.	n.a.
	227	60.88	n.a.	0.65875	n.a.		n.a.	n.a.
	228	60.9467	n.a.	2.2918	n.a.		n.a.	n.a.
	229	61.0233	n.a.	63.6729	n.a.		n.a.	n.a.
	230	61.1833	n.a.	2.30616	n.a.		n.a.	n.a.
	231	61.2567	n.a.	1.529	n.a.		n.a.	n.a.
	232	61.5567	n.a.	0.06234	n.a.		n.a.	n.a.
	233	61.6833	n.a.	0.32755	n.a.		n.a.	n.a.
	234	61.74	n.a.	0.09772	n.a.		n.a.	n.a.
	235	61.8567	n.a.	10	n.a.		n.a.	n.a.
	236	61.9533	n.a.	0.05772	n.a.		n.a.	n.a.
	237	62.0867	n.a.	0.08002	n.a.		n.a.	n.a.
	238	62.1767	n.a.	0.03346	n.a.		n.a.	n.a.
	239	62.24	n.a.	0.01622	n.a.		n.a.	n.a.
	240	62.3267	n.a.	0.25781	n.a.		n.a.	n.a.
	241	62.3767	n.a.	0.02147	n.a.		n.a.	n.a.
	242	62.5567	n.a.	0.02556	n.a.		n.a.	n.a.
	243	62.6467	n.a.	0.63751	n.a.		n.a.	n.a.
	244	62.74	n.a.	33	n.a.		n.a.	n.a.
	245	62.9533	n.a.	0	n.a.		n.a.	n.a.
	246	63.4	n.a.	0	n.a.		n.a.	n.a.
	247	64.43	n.a.	0.00934	n.a.		n.a.	n.a.
	248	64.6467	n.a.	0.00014	n.a.		n.a.	n.a.
	249	64.88	n.a.	0.0105	n.a.		n.a.	n.a.
	250	64.9567	n.a.	0.00966	n.a.		n.a.	n.a.
	251	65.1	n.a.	0.01277	n.a.		n.a.	n.a.
	252	65.24	n.a.	0.00496	n.a.		n.a.	n.a.
	253	65.4067	n.a.	0.01119	n.a.		n.a.	n.a.
	254	65.93	n.a.	0.00042	n.a.		n.a.	n.a.
	255	66.06	n.a.	0.00312	n.a.		n.a.	n.a.
	256	67.3767	n.a.	0.0053	n.a.		n.a.	n.a.
	257	67.4933	n.a.	0.00856	n.a.		n.a.	n.a.
	258	67.5633	n.a.	0.01337	n.a.		n.a.	n.a.
	259	67.62	n.a.	0.0016	n.a.		n.a.	n.a.
	260	67.6533	n.a.	0.01215	n.a.		n.a.	n.a.
	261	67.7167	n.a.	0.01425	n.a.		n.a.	n.a.
	262	67.7967	n.a.	0.01197	n.a.		n.a.	n.a.
	263	67.8667	n.a.	0.00131	n.a.		n.a.	n.a.
	264	67.96	n.a.	0.00484	n.a.		n.a.	n.a.
	265	68.11	n.a.	0.012	n.a.		n.a.	n.a.
	266	68.2	n.a.	0.00631	n.a.		n.a.	n.a.
	267	68.2867	n.a.	0.00718	n.a.		n.a.	n.a.
	268	68.38	n.a.	0.00343	n.a.		n.a.	n.a.
	269	68.5367	n.a.	0.00681	n.a.		n.a.	n.a.
	270	68.6367	n.a.	0.00527	n.a.		n.a.	n.a.
	271	68.7	n.a.	0.00814	n.a.		n.a.	n.a.
	272	68.7667	n.a.	0.01211	n.a.		n.a.	n.a.
	273	68.8267	n.a.	0.01143	n.a.		n.a.	n.a.
	274	68.8933	n.a.	0.00591	n.a.		n.a.	n.a.
	275	68.9767	n.a.	0.00126	n.a.		n.a.	n.a.
	276	69.05	n.a.	0.00533	n.a.		n.a.	n.a.
	277	69.1333	n.a.	0.01441	n.a.		n.a.	n.a.
	278	69.19	n.a.	0.00953	n.a.		n.a.	n.a.
	279	69.2133	n.a.	0.00937	n.a.		n.a.	n.a.
	280	69.2767	n.a.	0.00338	n.a.		n.a.	n.a.
	281	69.32	n.a.	0.00271	n.a.		n.a.	n.a.
	282	69.35	n.a.	0.00033	n.a.		n.a.	n.a.
	283	69.3933	n.a.	0.00199	n.a.		n.a.	n.a.
	284	69.4433	n.a.	0.00388	n.a.		n.a.	n.a.
	285	69.52	n.a.	0.00065	n.a.		n.a.	n.a.
	286	69.5467	n.a.	0.00262	n.a.		n.a.	n.a.
	287	69.6533	n.a.	0.00413	n.a.		n.a.	n.a.
	288	69.73	n.a.	0.00245	n.a.		n.a.	n.a.
	289	69.84	n.a.	0.00934	n.a.		n.a.	n.a.
	290	69.9067	n.a.	0.00342	n.a.		n.a.	n.a.
	291	69.94	n.a.	0.00401	n.a.		n.a.	n.a.
	Total:			1983.88				n.a.

## Sheet: Stevia 2
	Sample Name:		Stevia 2			Injection Volume:		10
	Vial Number:		GC5			Channel:		UV_VIS_1
	Sample Type:		unknown			Wavelength:		320.0
	Control Program:		20200611 CQAs 1_5mlmin-1 70min			Bandwidth:		4
	Quantif. Method:		20200611 CQAs 1_5mlmin-1 70min			Dilution Factor:		1
	Recording Time:		2020-10-21 22:19:30			Sample Weight:		1
	Run Time (min):		70			Sample Amount:		1
	No.	Ret.Time	Peak Name	Height	Spectrum Name		Lib.Name	Match
		min		mAU	in Library			with Lib
	1	0.116667	n.a.	0.02216	n.a.		n.a.	n.a.
	2	0.153333	n.a.	0.00432	n.a.		n.a.	n.a.
	3	0.32	n.a.	0.00951	n.a.		n.a.	n.a.
	4	0.4	n.a.	0.01007	n.a.		n.a.	n.a.
	5	0.483333	n.a.	0.01176	n.a.		n.a.	n.a.
	6	0.556667	n.a.	0.0016	n.a.		n.a.	n.a.
	7	0.63	n.a.	0.01043	n.a.		n.a.	n.a.
	8	0.7	n.a.	0.00681	n.a.		n.a.	n.a.
	9	0.766667	n.a.	12	n.a.		n.a.	n.a.
	10	0.8	n.a.	0.00239	n.a.		n.a.	n.a.
	11	0.876667	n.a.	0.00819	n.a.		n.a.	n.a.
	12	0.923333	n.a.	0.00864	n.a.		n.a.	n.a.
	13	0.99	n.a.	0.00143	n.a.		n.a.	n.a.
	14	1.03667	n.a.	0.01349	n.a.		n.a.	n.a.
	15	1.07333	n.a.	0.01479	n.a.		n.a.	n.a.
	16	1.15333	n.a.	0.00103	n.a.		n.a.	n.a.
	17	1.31	n.a.	11	n.a.		n.a.	n.a.
	18	1.37667	n.a.	0.06512	n.a.		n.a.	n.a.
	19	1.48333	n.a.	0.24689	n.a.		n.a.	n.a.
	20	1.56333	n.a.	0.46228	n.a.		n.a.	n.a.
	21	1.62	n.a.	0.39838	n.a.		n.a.	n.a.
	22	1.73333	n.a.	15	n.a.		n.a.	n.a.
	23	1.83667	n.a.	13.9002	n.a.		n.a.	n.a.
	24	1.96	n.a.	0.1384	n.a.		n.a.	n.a.
	25	2.09	n.a.	0.73434	n.a.		n.a.	n.a.
	26	2.29333	n.a.	0.12779	n.a.		n.a.	n.a.
	27	2.44	n.a.	0.01515	n.a.		n.a.	n.a.
	28	2.47333	n.a.	0.00104	n.a.		n.a.	n.a.
	29	2.54333	n.a.	0.01419	n.a.		n.a.	n.a.
	30	2.59333	n.a.	0.01355	n.a.		n.a.	n.a.
	31	2.66	n.a.	0.00371	n.a.		n.a.	n.a.
	32	2.68667	n.a.	0.00049	n.a.		n.a.	n.a.
	33	2.83333	n.a.	0.04189	n.a.		n.a.	n.a.
	34	3.11	n.a.	0.12023	n.a.		n.a.	n.a.
	35	3.72	n.a.	0.0835	n.a.		n.a.	n.a.
	36	4.00667	n.a.	0.0026	n.a.		n.a.	n.a.
	37	4.14	n.a.	0.01112	n.a.		n.a.	n.a.
	38	4.26667	n.a.	0.00426	n.a.		n.a.	n.a.
	39	4.39	n.a.	0.01154	n.a.		n.a.	n.a.
	40	4.57333	n.a.	0.01705	n.a.		n.a.	n.a.
	41	4.61667	1-CQA	0.00426	n.a.		n.a.	n.a.
	42	5.66333	n.a.	0.01154	n.a.		n.a.	n.a.
	43	6.77667	n.a.	0.00324	n.a.		n.a.	n.a.
	44	7.94667	3-CQA	45	n.a.		n.a.	n.a.
	45	9.11667	n.a.	0.00324	n.a.		n.a.	n.a.
	46	9.20667	n.a.	0.00505	n.a.		n.a.	n.a.
	47	9.32667	n.a.	0.00392	n.a.		n.a.	n.a.
	48	9.40333	n.a.	0.0029	n.a.		n.a.	n.a.
	49	9.47	n.a.	0.0038	n.a.		n.a.	n.a.
	50	9.57667	n.a.	0.01504	n.a.		n.a.	n.a.
	51	9.68333	n.a.	0.01985	n.a.		n.a.	n.a.
	52	9.72667	n.a.	0.0034	n.a.		n.a.	n.a.
	53	9.95	n.a.	0.00603	n.a.		n.a.	n.a.
	54	10.6933	n.a.	0.37577	n.a.		n.a.	n.a.
	55	10.99	n.a.	0.30478	n.a.		n.a.	n.a.
	56	11.3833	n.a.	0.01043	n.a.		n.a.	n.a.
	57	11.45	n.a.	0.00643	n.a.		n.a.	n.a.
	58	11.64	n.a.	0.00488	n.a.		n.a.	n.a.
	59	11.6967	n.a.	0.01123	n.a.		n.a.	n.a.
	60	11.8067	n.a.	0.02873	n.a.		n.a.	n.a.
	61	12.5433	n.a.	0.32992	n.a.		n.a.	n.a.
	62	12.9367	n.a.	0.01324	n.a.		n.a.	n.a.
	63	13.0467	n.a.	0.00557	n.a.		n.a.	n.a.
	64	13.1133	n.a.	0.00197	n.a.		n.a.	n.a.
	65	13.1867	n.a.	0.00555	n.a.		n.a.	n.a.
	66	13.2567	n.a.	0.00381	n.a.		n.a.	n.a.
	67	13.3867	n.a.	0.00927	n.a.		n.a.	n.a.
	68	13.55	n.a.	0.00729	n.a.		n.a.	n.a.
	69	13.7067	n.a.	0.00786	n.a.		n.a.	n.a.
	70	13.8133	n.a.	0.00552	n.a.		n.a.	n.a.
	71	13.8633	n.a.	0.00622	n.a.		n.a.	n.a.
	72	14.0833	n.a.	0.00958	n.a.		n.a.	n.a.
	73	14.2433	n.a.	0.00927	n.a.		n.a.	n.a.
	74	14.32	n.a.	0.01171	n.a.		n.a.	n.a.
	75	14.4033	n.a.	0.00331	n.a.		n.a.	n.a.
	76	14.5167	n.a.	0.00758	n.a.		n.a.	n.a.
	77	14.6067	n.a.	0.00507	n.a.		n.a.	n.a.
	78	14.6967	n.a.	0.00184	n.a.		n.a.	n.a.
	79	14.7433	n.a.	0.00182	n.a.		n.a.	n.a.
	80	14.7967	n.a.	0.01047	n.a.		n.a.	n.a.
	81	14.87	n.a.	0.00925	n.a.		n.a.	n.a.
	82	14.9967	n.a.	0.00562	n.a.		n.a.	n.a.
	83	15.08	n.a.	0.00696	n.a.		n.a.	n.a.
	84	15.9133	n.a.	0.76406	n.a.		n.a.	n.a.
	85	16.39	n.a.	0.12479	n.a.		n.a.	n.a.
	86	16.4533	n.a.	0.00848	n.a.		n.a.	n.a.
	87	16.7067	n.a.	0.00215	n.a.		n.a.	n.a.
	88	16.8067	n.a.	0.00715	n.a.		n.a.	n.a.
	89	16.8933	n.a.	0.02494	n.a.		n.a.	n.a.
	90	17.5967	5-CQA	321	n.a.		n.a.	n.a.
	91	18.19	n.a.	0.22119	n.a.		n.a.	n.a.
	92	18.5333	n.a.	0.28813	n.a.		n.a.	n.a.
	93	18.8967	n.a.	0.14315	n.a.		n.a.	n.a.
	94	20.8533	4-CQA	33	n.a.		n.a.	n.a.
	95	23.7567	n.a.	0.06456	n.a.		n.a.	n.a.
	96	23.8233	n.a.	0.00629	n.a.		n.a.	n.a.
	97	23.9267	n.a.	0.00727	n.a.		n.a.	n.a.
	98	24	n.a.	0.0056	n.a.		n.a.	n.a.
	99	24.1533	n.a.	0.0044	n.a.		n.a.	n.a.
	100	24.2633	n.a.	0.00523	n.a.		n.a.	n.a.
	101	24.3233	n.a.	0.00501	n.a.		n.a.	n.a.
	102	24.44	n.a.	0.0078	n.a.		n.a.	n.a.
	103	24.5	n.a.	0.00167	n.a.		n.a.	n.a.
	104	24.5367	n.a.	0.00914	n.a.		n.a.	n.a.
	105	24.6533	n.a.	0.01594	n.a.		n.a.	n.a.
	106	24.73	n.a.	0.0017	n.a.		n.a.	n.a.
	107	24.79	n.a.	0.0055	n.a.		n.a.	n.a.
	108	24.9033	n.a.	0.0059	n.a.		n.a.	n.a.
	109	24.95	n.a.	0.04093	n.a.		n.a.	n.a.
	110	25.1033	n.a.	0.00316	n.a.		n.a.	n.a.
	111	25.1667	n.a.	0.00386	n.a.		n.a.	n.a.
	112	25.26	n.a.	0.01501	n.a.		n.a.	n.a.
	113	25.6167	n.a.	0.1395	n.a.		n.a.	n.a.
	114	25.9067	n.a.	0.19557	n.a.		n.a.	n.a.
	115	26.3033	n.a.	0.00384	n.a.		n.a.	n.a.
	116	26.54	n.a.	0.09131	n.a.		n.a.	n.a.
	117	26.57	n.a.	0.00346	n.a.		n.a.	n.a.
	118	27.0533	n.a.	6.52146	n.a.		n.a.	n.a.
	119	27.5767	n.a.	0.63631	n.a.		n.a.	n.a.
	120	27.98	n.a.	0.84296	n.a.		n.a.	n.a.
	121	28.2233	Puerarin	400.87	n.a.		n.a.	n.a.
	122	28.6633	n.a.	1.25929	n.a.		n.a.	n.a.
	123	28.9733	n.a.	6.7933	n.a.		n.a.	n.a.
	124	29.2567	n.a.	0.11938	n.a.		n.a.	n.a.
	125	29.5767	n.a.	0.72418	n.a.		n.a.	n.a.
	126	30.1233	n.a.	2.32104	n.a.		n.a.	n.a.
	127	30.4067	n.a.	0.11891	n.a.		n.a.	n.a.
	128	30.6533	1,3-diCQA	0	n.a.		n.a.	n.a.
	129	31.11	n.a.	0.30755	n.a.		n.a.	n.a.
	130	31.3667	n.a.	4.2455	n.a.		n.a.	n.a.
	131	31.7933	n.a.	0.54235	n.a.		n.a.	n.a.
	132	32.11	n.a.	2.22482	n.a.		n.a.	n.a.
	133	32.32	n.a.	1.79493	n.a.		n.a.	n.a.
	134	32.5233	n.a.	1.74639	n.a.		n.a.	n.a.
	135	32.5833	n.a.	0.09555	n.a.		n.a.	n.a.
	136	32.75	n.a.	0.31201	n.a.		n.a.	n.a.
	137	33.29	n.a.	0.23199	n.a.		n.a.	n.a.
	138	33.48	n.a.	1.83735	n.a.		n.a.	n.a.
	139	33.7467	n.a.	0.06597	n.a.		n.a.	n.a.
	140	33.9333	n.a.	0.21948	n.a.		n.a.	n.a.
	141	34.4267	n.a.	1.34783	n.a.		n.a.	n.a.
	142	34.8067	n.a.	0.06397	n.a.		n.a.	n.a.
	143	35.0667	n.a.	1.90957	n.a.		n.a.	n.a.
	144	35.8967	n.a.	1.39762	n.a.		n.a.	n.a.
	145	36.3133	1,4 diCQA	0	n.a.		n.a.	n.a.
	146	37.0333	n.a.	0.05518	n.a.		n.a.	n.a.
	147	37.3467	n.a.	3.68962	n.a.		n.a.	n.a.
	148	38.0433	n.a.	1.21947	n.a.		n.a.	n.a.
	149	38.4533	n.a.	0.94338	n.a.		n.a.	n.a.
	150	38.91	n.a.	3.70031	n.a.		n.a.	n.a.
	151	39.5767	n.a.	0.25735	n.a.		n.a.	n.a.
	152	40.4567	n.a.	123.98	n.a.		n.a.	n.a.
	153	40.93	3,4 diCQA	140.8	n.a.		n.a.	n.a.
	154	41.7933	n.a.	0.0004	n.a.		n.a.	n.a.
	155	42.3433	n.a.	20.3013	n.a.		n.a.	n.a.
	156	42.7967	1,5 diCQA	0.94338	n.a.		n.a.	n.a.
	157	44.12	n.a.	0.00998	n.a.		n.a.	n.a.
	158	44.2267	n.a.	0.00751	n.a.		n.a.	n.a.
	159	45.3567	3,5 diCQA	490	n.a.		n.a.	n.a.
	160	46.65	n.a.	55.2629	n.a.		n.a.	n.a.
	161	47.92	n.a.	0.00132	n.a.		n.a.	n.a.
	162	48.18	n.a.	1.15183	n.a.		n.a.	n.a.
	163	49.96	n.a.	2.31593	n.a.		n.a.	n.a.
	164	50.9667	n.a.	1.57016	n.a.		n.a.	n.a.
	165	51.69	n.a.	0.00451	n.a.		n.a.	n.a.
	166	52.61	n.a.	0.34128	n.a.		n.a.	n.a.
	167	52.7333	n.a.	0.00479	n.a.		n.a.	n.a.
	168	52.7967	n.a.	0.00317	n.a.		n.a.	n.a.
	169	52.85	n.a.	0.0202	n.a.		n.a.	n.a.
	170	53.28	n.a.	0.0002	n.a.		n.a.	n.a.
	171	53.4367	n.a.	0.00265	n.a.		n.a.	n.a.
	172	53.53	n.a.	0.01165	n.a.		n.a.	n.a.
	173	53.5933	n.a.	0.00227	n.a.		n.a.	n.a.
	174	53.6567	n.a.	0.0009	n.a.		n.a.	n.a.
	175	53.6933	n.a.	0.02148	n.a.		n.a.	n.a.
	176	53.84	n.a.	0.00304	n.a.		n.a.	n.a.
	177	53.8967	n.a.	0.02806	n.a.		n.a.	n.a.
	178	53.94	n.a.	0.0052	n.a.		n.a.	n.a.
	179	54.1667	n.a.	0.00873	n.a.		n.a.	n.a.
	180	54.3167	n.a.	0.00958	n.a.		n.a.	n.a.
	181	54.3833	n.a.	0.00598	n.a.		n.a.	n.a.
	182	54.4367	n.a.	0.00031	n.a.		n.a.	n.a.
	183	54.5733	n.a.	0.01272	n.a.		n.a.	n.a.
	184	54.6367	n.a.	0.01999	n.a.		n.a.	n.a.
	185	54.6967	n.a.	0.00082	n.a.		n.a.	n.a.
	186	54.9733	n.a.	0.02057	n.a.		n.a.	n.a.
	187	55.04	n.a.	0.0195	n.a.		n.a.	n.a.
	188	55.13	n.a.	0.0069	n.a.		n.a.	n.a.
	189	55.1767	n.a.	0.00642	n.a.		n.a.	n.a.
	190	55.2233	n.a.	0.00739	n.a.		n.a.	n.a.
	191	55.2767	n.a.	0.00904	n.a.		n.a.	n.a.
	192	55.3433	n.a.	0.00982	n.a.		n.a.	n.a.
	193	55.4433	n.a.	0.00579	n.a.		n.a.	n.a.
	194	55.5167	n.a.	0.00164	n.a.		n.a.	n.a.
	195	55.6233	n.a.	0.00601	n.a.		n.a.	n.a.
	196	55.71	n.a.	0.01233	n.a.		n.a.	n.a.
	197	55.7767	n.a.	0.00339	n.a.		n.a.	n.a.
	198	55.91	n.a.	0.00394	n.a.		n.a.	n.a.
	199	56.9433	4,5 diCQA	120.6	n.a.		n.a.	n.a.
	200	57.79	n.a.	4.14958	n.a.		n.a.	n.a.
	201	57.8933	n.a.	60.1993	n.a.		n.a.	n.a.
	202	57.9933	n.a.	0.00339	n.a.		n.a.	n.a.
	203	58.1067	n.a.	0.00339	n.a.		n.a.	n.a.
	204	58.3367	n.a.	0	n.a.		n.a.	n.a.
	205	58.52	n.a.	0.39699	n.a.		n.a.	n.a.
	206	58.6	n.a.	1.98256	n.a.		n.a.	n.a.
	207	58.7667	n.a.	21.9	n.a.		n.a.	n.a.
	208	58.8467	n.a.	0.14476	n.a.		n.a.	n.a.
	209	58.99	n.a.	4.28941	n.a.		n.a.	n.a.
	210	59.14	n.a.	0.22551	n.a.		n.a.	n.a.
	211	59.24	n.a.	6.2366	n.a.		n.a.	n.a.
	212	59.39	n.a.	0.25154	n.a.		n.a.	n.a.
	213	59.4833	n.a.	3.77971	n.a.		n.a.	n.a.
	214	59.5667	n.a.	0.09293	n.a.		n.a.	n.a.
	215	59.6	n.a.	0.89486	n.a.		n.a.	n.a.
	216	59.7267	n.a.	13	n.a.		n.a.	n.a.
	217	59.8367	n.a.	0.54093	n.a.		n.a.	n.a.
	218	59.9767	n.a.	0.18488	n.a.		n.a.	n.a.
	219	60.04	n.a.	0.03824	n.a.		n.a.	n.a.
	220	60.1333	n.a.	0.17309	n.a.		n.a.	n.a.
	221	60.2467	n.a.	0.03917	n.a.		n.a.	n.a.
	222	60.2933	n.a.	0.37036	n.a.		n.a.	n.a.
	223	60.42	n.a.	0.34168	n.a.		n.a.	n.a.
	224	60.5067	n.a.	0.67513	n.a.		n.a.	n.a.
	225	60.6733	n.a.	1.05183	n.a.		n.a.	n.a.
	226	60.7867	n.a.	0.15533	n.a.		n.a.	n.a.
	227	60.88	n.a.	0.65875	n.a.		n.a.	n.a.
	228	60.9467	n.a.	44	n.a.		n.a.	n.a.
	229	61.0233	n.a.	63.6729	n.a.		n.a.	n.a.
	230	61.1833	n.a.	2.30616	n.a.		n.a.	n.a.
	231	61.2567	n.a.	1.529	n.a.		n.a.	n.a.
	232	61.5567	n.a.	0.06234	n.a.		n.a.	n.a.
	233	61.6833	n.a.	0.32755	n.a.		n.a.	n.a.
	234	61.74	n.a.	0.09772	n.a.		n.a.	n.a.
	235	61.8567	n.a.	0.38617	n.a.		n.a.	n.a.
	236	61.9533	n.a.	0.05772	n.a.		n.a.	n.a.
	237	62.0867	n.a.	0.08002	n.a.		n.a.	n.a.
	238	62.1767	n.a.	0.03346	n.a.		n.a.	n.a.
	239	62.24	n.a.	0.01622	n.a.		n.a.	n.a.
	240	62.3267	n.a.	0.25781	n.a.		n.a.	n.a.
	241	62.3767	n.a.	0.02147	n.a.		n.a.	n.a.
	242	62.5567	n.a.	0.02556	n.a.		n.a.	n.a.
	243	62.6467	n.a.	16	n.a.		n.a.	n.a.
	244	62.74	n.a.	16.3284	n.a.		n.a.	n.a.
	245	62.9533	n.a.	1.73053	n.a.		n.a.	n.a.
	246	63.4	n.a.	18	n.a.		n.a.	n.a.
	247	64.43	n.a.	0.00934	n.a.		n.a.	n.a.
	248	64.6467	n.a.	0.00014	n.a.		n.a.	n.a.
	249	64.88	n.a.	0.0105	n.a.		n.a.	n.a.
	250	64.9567	n.a.	0.00966	n.a.		n.a.	n.a.
	251	65.1	n.a.	0.01277	n.a.		n.a.	n.a.
	252	65.24	n.a.	0.00496	n.a.		n.a.	n.a.
	253	65.4067	n.a.	0.01119	n.a.		n.a.	n.a.
	254	65.93	n.a.	0.00042	n.a.		n.a.	n.a.
	255	66.06	n.a.	0.00312	n.a.		n.a.	n.a.
	256	67.3767	n.a.	0.0053	n.a.		n.a.	n.a.
	257	67.4933	n.a.	0.00856	n.a.		n.a.	n.a.
	258	67.5633	n.a.	0.01337	n.a.		n.a.	n.a.
	259	67.62	n.a.	0.0016	n.a.		n.a.	n.a.
	260	67.6533	n.a.	0.01215	n.a.		n.a.	n.a.
	261	67.7167	n.a.	0.01425	n.a.		n.a.	n.a.
	262	67.7967	n.a.	0.01197	n.a.		n.a.	n.a.
	263	67.8667	n.a.	0.00131	n.a.		n.a.	n.a.
	264	67.96	n.a.	0.00484	n.a.		n.a.	n.a.
	265	68.11	n.a.	0.012	n.a.		n.a.	n.a.
	266	68.2	n.a.	0.00631	n.a.		n.a.	n.a.
	267	68.2867	n.a.	0.00718	n.a.		n.a.	n.a.
	268	68.38	n.a.	0.00343	n.a.		n.a.	n.a.
	269	68.5367	n.a.	0.00681	n.a.		n.a.	n.a.
	270	68.6367	n.a.	0.00527	n.a.		n.a.	n.a.
	271	68.7	n.a.	0.00814	n.a.		n.a.	n.a.
	272	68.7667	n.a.	0.01211	n.a.		n.a.	n.a.
	273	68.8267	n.a.	0.01143	n.a.		n.a.	n.a.
	274	68.8933	n.a.	0.00591	n.a.		n.a.	n.a.
	275	68.9767	n.a.	0.00126	n.a.		n.a.	n.a.
	276	69.05	n.a.	0.00533	n.a.		n.a.	n.a.
	277	69.1333	n.a.	0.01441	n.a.		n.a.	n.a.
	278	69.19	n.a.	0.00953	n.a.		n.a.	n.a.
	279	69.2133	n.a.	0.00937	n.a.		n.a.	n.a.
	280	69.2767	n.a.	0.00338	n.a.		n.a.	n.a.
	281	69.32	n.a.	0.00271	n.a.		n.a.	n.a.
	282	69.35	n.a.	0.00033	n.a.		n.a.	n.a.
	283	69.3933	n.a.	0.00199	n.a.		n.a.	n.a.
	284	69.4433	n.a.	0.00388	n.a.		n.a.	n.a.
	285	69.52	n.a.	0.00065	n.a.		n.a.	n.a.
	286	69.5467	n.a.	0.00262	n.a.		n.a.	n.a.
	287	69.6533	n.a.	0.00413	n.a.		n.a.	n.a.
	288	69.73	n.a.	0.00245	n.a.		n.a.	n.a.
	289	69.84	n.a.	0.00934	n.a.		n.a.	n.a.
	290	69.9067	n.a.	0.00342	n.a.		n.a.	n.a.
	291	69.94	n.a.	0.00401	n.a.		n.a.	n.a.
	Total:			2150.06				n.a.

## Sheet: Pluchea 2
	Sample Name:		Pluchea indica 2			Injection Volume:		10
	Vial Number:		GB1			Channel:		UV_VIS_1
	Sample Type:		unknown			Wavelength:		320.0
	Control Program:		20200611 CQAs 1_5mlmin-1 70min			Bandwidth:		4
	Quantif. Method:		20200611 CQAs 1_5mlmin-1 70min			Dilution Factor:		1
	Recording Time:		2020-10-21 22:19:30			Sample Weight:		1
	Run Time (min):		70			Sample Amount:		1
	No.	Ret.Time	Peak Name	Height	Spectrum Name		Lib.Name	Match
		min		mAU	in Library			with Lib
	1	0.116667	n.a.	0.02216	n.a.		n.a.	n.a.
	2	0.153333	n.a.	0.00432	n.a.		n.a.	n.a.
	3	0.32	n.a.	0.00951	n.a.		n.a.	n.a.
	4	0.4	n.a.	0.01007	n.a.		n.a.	n.a.
	5	0.483333	n.a.	0.01176	n.a.		n.a.	n.a.
	6	0.556667	n.a.	0.0016	n.a.		n.a.	n.a.
	7	0.63	n.a.	0.01043	n.a.		n.a.	n.a.
	8	0.7	n.a.	0.00681	n.a.		n.a.	n.a.
	9	0.766667	n.a.	0.00099	n.a.		n.a.	n.a.
	10	0.8	n.a.	0.00239	n.a.		n.a.	n.a.
	11	0.876667	n.a.	0.00819	n.a.		n.a.	n.a.
	12	0.923333	n.a.	0.00864	n.a.		n.a.	n.a.
	13	0.99	n.a.	0.00143	n.a.		n.a.	n.a.
	14	1.03667	n.a.	0.01349	n.a.		n.a.	n.a.
	15	1.07333	n.a.	0.01479	n.a.		n.a.	n.a.
	16	1.15333	n.a.	0.00103	n.a.		n.a.	n.a.
	17	1.31	n.a.	0.05742	n.a.		n.a.	n.a.
	18	1.37667	n.a.	0.06512	n.a.		n.a.	n.a.
	19	1.48333	n.a.	12.7	n.a.		n.a.	n.a.
	20	1.56333	n.a.	0	n.a.		n.a.	n.a.
	21	1.62	n.a.	0.39838	n.a.		n.a.	n.a.
	22	1.73333	n.a.	1.19868	n.a.		n.a.	n.a.
	23	1.83667	n.a.	13.9002	n.a.		n.a.	n.a.
	24	1.96	n.a.	0.1384	n.a.		n.a.	n.a.
	25	2.09	n.a.	22.88	n.a.		n.a.	n.a.
	26	2.29333	n.a.	0.12779	n.a.		n.a.	n.a.
	27	2.44	n.a.	0.01515	n.a.		n.a.	n.a.
	28	2.47333	n.a.	0.00104	n.a.		n.a.	n.a.
	29	2.54333	n.a.	0	n.a.		n.a.	n.a.
	30	2.59333	n.a.	0	n.a.		n.a.	n.a.
	31	2.66	n.a.	0.00371	n.a.		n.a.	n.a.
	32	2.68667	n.a.	0.00049	n.a.		n.a.	n.a.
	33	2.83333	n.a.	0.04189	n.a.		n.a.	n.a.
	34	3.11	n.a.	0.12023	n.a.		n.a.	n.a.
	35	3.72	n.a.	0.0835	n.a.		n.a.	n.a.
	36	4.00667	n.a.	0.0026	n.a.		n.a.	n.a.
	37	4.14	n.a.	0.01112	n.a.		n.a.	n.a.
	38	4.26667	n.a.	0.00426	n.a.		n.a.	n.a.
	39	4.39	n.a.	0.01154	n.a.		n.a.	n.a.
	40	4.57333	n.a.	0.01705	n.a.		n.a.	n.a.
	41	4.61667	1-CQA	0.00426	n.a.		n.a.	n.a.
	42	5.66333	n.a.	0.01154	n.a.		n.a.	n.a.
	43	6.77667	n.a.	0.00324	n.a.		n.a.	n.a.
	44	7.94667	3-CQA	9.99	n.a.		n.a.	n.a.
	45	9.11667	n.a.	0.00324	n.a.		n.a.	n.a.
	46	9.20667	n.a.	0.00505	n.a.		n.a.	n.a.
	47	9.32667	n.a.	0.00392	n.a.		n.a.	n.a.
	48	9.40333	n.a.	0.0029	n.a.		n.a.	n.a.
	49	9.47	n.a.	0.0038	n.a.		n.a.	n.a.
	50	9.57667	n.a.	0.01504	n.a.		n.a.	n.a.
	51	9.68333	n.a.	0.01985	n.a.		n.a.	n.a.
	52	9.72667	n.a.	0.0034	n.a.		n.a.	n.a.
	53	9.95	n.a.	0.00603	n.a.		n.a.	n.a.
	54	10.6933	n.a.	0.37577	n.a.		n.a.	n.a.
	55	10.99	n.a.	0.30478	n.a.		n.a.	n.a.
	56	11.3833	n.a.	0.01043	n.a.		n.a.	n.a.
	57	11.45	n.a.	0.00643	n.a.		n.a.	n.a.
	58	11.64	n.a.	0.00488	n.a.		n.a.	n.a.
	59	11.6967	n.a.	0.01123	n.a.		n.a.	n.a.
	60	11.8067	n.a.	0.02873	n.a.		n.a.	n.a.
	61	12.5433	n.a.	0.32992	n.a.		n.a.	n.a.
	62	12.9367	n.a.	0.01324	n.a.		n.a.	n.a.
	63	13.0467	n.a.	0.00557	n.a.		n.a.	n.a.
	64	13.1133	n.a.	0.00197	n.a.		n.a.	n.a.
	65	13.1867	n.a.	0.00555	n.a.		n.a.	n.a.
	66	13.2567	n.a.	0.00381	n.a.		n.a.	n.a.
	67	13.3867	n.a.	0.00927	n.a.		n.a.	n.a.
	68	13.55	n.a.	0.00729	n.a.		n.a.	n.a.
	69	13.7067	n.a.	0	n.a.		n.a.	n.a.
	70	13.8133	n.a.	0.00552	n.a.		n.a.	n.a.
	71	13.8633	n.a.	0.00622	n.a.		n.a.	n.a.
	72	14.0833	n.a.	0.00958	n.a.		n.a.	n.a.
	73	14.2433	n.a.	0.00927	n.a.		n.a.	n.a.
	74	14.32	n.a.	0	n.a.		n.a.	n.a.
	75	14.4033	n.a.	0.00331	n.a.		n.a.	n.a.
	76	14.5167	n.a.	0.00758	n.a.		n.a.	n.a.
	77	14.6067	n.a.	0.00507	n.a.		n.a.	n.a.
	78	14.6967	n.a.	0.00184	n.a.		n.a.	n.a.
	79	14.7433	n.a.	0	n.a.		n.a.	n.a.
	80	14.7967	n.a.	0.01047	n.a.		n.a.	n.a.
	81	14.87	n.a.	0.00925	n.a.		n.a.	n.a.
	82	14.9967	n.a.	0.00562	n.a.		n.a.	n.a.
	83	15.08	n.a.	0.00696	n.a.		n.a.	n.a.
	84	15.9133	n.a.	0.76406	n.a.		n.a.	n.a.
	85	16.39	n.a.	0.12479	n.a.		n.a.	n.a.
	86	16.4533	n.a.	0.00848	n.a.		n.a.	n.a.
	87	16.7067	n.a.	0.00215	n.a.		n.a.	n.a.
	88	16.8067	n.a.	0.00715	n.a.		n.a.	n.a.
	89	16.8933	n.a.	0.02494	n.a.		n.a.	n.a.
	90	17.5967	5-CQA	390.87	n.a.		n.a.	n.a.
	91	18.19	n.a.	0.22119	n.a.		n.a.	n.a.
	92	18.5333	n.a.	0.28813	n.a.		n.a.	n.a.
	93	18.8967	n.a.	0.14315	n.a.		n.a.	n.a.
	94	20.8533	4-CQA	0	n.a.		n.a.	n.a.
	95	23.7567	n.a.	0.06456	n.a.		n.a.	n.a.
	96	23.8233	n.a.	0.00629	n.a.		n.a.	n.a.
	97	23.9267	n.a.	0.00727	n.a.		n.a.	n.a.
	98	24	n.a.	0.0056	n.a.		n.a.	n.a.
	99	24.1533	n.a.	0.0044	n.a.		n.a.	n.a.
	100	24.2633	n.a.	0.00523	n.a.		n.a.	n.a.
	101	24.3233	n.a.	0.00501	n.a.		n.a.	n.a.
	102	24.44	n.a.	0.0078	n.a.		n.a.	n.a.
	103	24.5	n.a.	0.00167	n.a.		n.a.	n.a.
	104	24.5367	n.a.	0.00914	n.a.		n.a.	n.a.
	105	24.6533	n.a.	0.01594	n.a.		n.a.	n.a.
	106	24.73	n.a.	0.0017	n.a.		n.a.	n.a.
	107	24.79	n.a.	0.0055	n.a.		n.a.	n.a.
	108	24.9033	n.a.	0.0059	n.a.		n.a.	n.a.
	109	24.95	n.a.	0.04093	n.a.		n.a.	n.a.
	110	25.1033	n.a.	0.00316	n.a.		n.a.	n.a.
	111	25.1667	n.a.	0.00386	n.a.		n.a.	n.a.
	112	25.26	n.a.	0.01501	n.a.		n.a.	n.a.
	113	25.6167	n.a.	0.1395	n.a.		n.a.	n.a.
	114	25.9067	n.a.	0	n.a.		n.a.	n.a.
	115	26.3033	n.a.	0.00384	n.a.		n.a.	n.a.
	116	26.54	n.a.	0.09131	n.a.		n.a.	n.a.
	117	26.57	n.a.	0.00346	n.a.		n.a.	n.a.
	118	27.0533	n.a.	0	n.a.		n.a.	n.a.
	119	27.5767	n.a.	0.63631	n.a.		n.a.	n.a.
	120	27.98	n.a.	0.84296	n.a.		n.a.	n.a.
	121	28.2233	Puerarin	400.87	n.a.		n.a.	n.a.
	122	28.6633	n.a.	1.25929	n.a.		n.a.	n.a.
	123	28.9733	n.a.	0	n.a.		n.a.	n.a.
	124	29.2567	n.a.	0.11938	n.a.		n.a.	n.a.
	125	29.5767	n.a.	0.72418	n.a.		n.a.	n.a.
	126	30.1233	n.a.	2.32104	n.a.		n.a.	n.a.
	127	30.4067	n.a.	0.11891	n.a.		n.a.	n.a.
	128	30.6533	1,3-diCQA	2.77	n.a.		n.a.	n.a.
	129	31.11	n.a.	0.30755	n.a.		n.a.	n.a.
	130	31.3667	n.a.	4.2455	n.a.		n.a.	n.a.
	131	31.7933	n.a.	0.54235	n.a.		n.a.	n.a.
	132	32.11	n.a.	2.22482	n.a.		n.a.	n.a.
	133	32.32	n.a.	1.79493	n.a.		n.a.	n.a.
	134	32.5233	n.a.	1.74639	n.a.		n.a.	n.a.
	135	32.5833	n.a.	0.09555	n.a.		n.a.	n.a.
	136	32.75	n.a.	0.31201	n.a.		n.a.	n.a.
	137	33.29	n.a.	0.23199	n.a.		n.a.	n.a.
	138	33.48	n.a.	1.83735	n.a.		n.a.	n.a.
	139	33.7467	n.a.	0.06597	n.a.		n.a.	n.a.
	140	33.9333	n.a.	0.21948	n.a.		n.a.	n.a.
	141	34.4267	n.a.	1.34783	n.a.		n.a.	n.a.
	142	34.8067	n.a.	0.06397	n.a.		n.a.	n.a.
	143	35.0667	n.a.	1.90957	n.a.		n.a.	n.a.
	144	35.8967	n.a.	1.39762	n.a.		n.a.	n.a.
	145	36.3133	1,4 diCQA	0.09555	n.a.		n.a.	n.a.
	146	37.0333	n.a.	0.05518	n.a.		n.a.	n.a.
	147	37.3467	n.a.	3.68962	n.a.		n.a.	n.a.
	148	38.0433	n.a.	1.21947	n.a.		n.a.	n.a.
	149	38.4533	n.a.	0.94338	n.a.		n.a.	n.a.
	150	38.91	n.a.	3.70031	n.a.		n.a.	n.a.
	151	39.5767	n.a.	0.25735	n.a.		n.a.	n.a.
	152	40.4567	n.a.	133	n.a.		n.a.	n.a.
	153	40.93	3,4 diCQA	68.98	n.a.		n.a.	n.a.
	154	41.7933	n.a.	0.0004	n.a.		n.a.	n.a.
	155	42.3433	n.a.	20.3013	n.a.		n.a.	n.a.
	156	42.7967	1,5 diCQA	0.94338	n.a.		n.a.	n.a.
	157	44.12	n.a.	0.00998	n.a.		n.a.	n.a.
	158	44.2267	n.a.	0.00751	n.a.		n.a.	n.a.
	159	45.3567	3,5 diCQA	543	n.a.		n.a.	n.a.
	160	46.65	n.a.	33	n.a.		n.a.	n.a.
	161	47.92	n.a.	0.00132	n.a.		n.a.	n.a.
	162	48.18	n.a.	1.15183	n.a.		n.a.	n.a.
	163	49.96	n.a.	2.31593	n.a.		n.a.	n.a.
	164	50.9667	n.a.	1.57016	n.a.		n.a.	n.a.
	165	51.69	n.a.	0.00451	n.a.		n.a.	n.a.
	166	52.61	n.a.	0.34128	n.a.		n.a.	n.a.
	167	52.7333	n.a.	0.00479	n.a.		n.a.	n.a.
	168	52.7967	n.a.	0.00317	n.a.		n.a.	n.a.
	169	52.85	n.a.	0.0202	n.a.		n.a.	n.a.
	170	53.28	n.a.	0.0002	n.a.		n.a.	n.a.
	171	53.4367	n.a.	0.00265	n.a.		n.a.	n.a.
	172	53.53	n.a.	0.01165	n.a.		n.a.	n.a.
	173	53.5933	n.a.	0.00227	n.a.		n.a.	n.a.
	174	53.6567	n.a.	0.0009	n.a.		n.a.	n.a.
	175	53.6933	n.a.	0.02148	n.a.		n.a.	n.a.
	176	53.84	n.a.	0.00304	n.a.		n.a.	n.a.
	177	53.8967	n.a.	0.02806	n.a.		n.a.	n.a.
	178	53.94	n.a.	0.0052	n.a.		n.a.	n.a.
	179	54.1667	n.a.	0.00873	n.a.		n.a.	n.a.
	180	54.3167	n.a.	0.00958	n.a.		n.a.	n.a.
	181	54.3833	n.a.	0.00598	n.a.		n.a.	n.a.
	182	54.4367	n.a.	0.00031	n.a.		n.a.	n.a.
	183	54.5733	n.a.	0.01272	n.a.		n.a.	n.a.
	184	54.6367	n.a.	0.01999	n.a.		n.a.	n.a.
	185	54.6967	n.a.	0.00082	n.a.		n.a.	n.a.
	186	54.9733	n.a.	0.02057	n.a.		n.a.	n.a.
	187	55.04	n.a.	0.0195	n.a.		n.a.	n.a.
	188	55.13	n.a.	0.0069	n.a.		n.a.	n.a.
	189	55.1767	n.a.	0.00642	n.a.		n.a.	n.a.
	190	55.2233	n.a.	0.00739	n.a.		n.a.	n.a.
	191	55.2767	n.a.	0.00904	n.a.		n.a.	n.a.
	192	55.3433	n.a.	0.00982	n.a.		n.a.	n.a.
	193	55.4433	n.a.	0.00579	n.a.		n.a.	n.a.
	194	55.5167	n.a.	0.00164	n.a.		n.a.	n.a.
	195	55.6233	n.a.	0.00601	n.a.		n.a.	n.a.
	196	55.71	n.a.	0.01233	n.a.		n.a.	n.a.
	197	55.7767	n.a.	0.00339	n.a.		n.a.	n.a.
	198	55.91	n.a.	0.00394	n.a.		n.a.	n.a.
	199	56.9433	4,5 diCQA	78	n.a.		n.a.	n.a.
	200	57.79	n.a.	4.14958	n.a.		n.a.	n.a.
	201	57.8933	n.a.	0	n.a.		n.a.	n.a.
	202	57.9933	n.a.	0.00339	n.a.		n.a.	n.a.
	203	58.1067	n.a.	66	n.a.		n.a.	n.a.
	204	58.3367	n.a.	44	n.a.		n.a.	n.a.
	205	58.52	n.a.	0.39699	n.a.		n.a.	n.a.
	206	58.6	n.a.	1.98256	n.a.		n.a.	n.a.
	207	58.7667	n.a.	21.9	n.a.		n.a.	n.a.
	208	58.8467	n.a.	0.14476	n.a.		n.a.	n.a.
	209	58.99	n.a.	22	n.a.		n.a.	n.a.
	210	59.14	n.a.	0.22551	n.a.		n.a.	n.a.
	211	59.24	n.a.	6.2366	n.a.		n.a.	n.a.
	212	59.39	n.a.	0.25154	n.a.		n.a.	n.a.
	213	59.4833	n.a.	3.77971	n.a.		n.a.	n.a.
	214	59.5667	n.a.	0.09293	n.a.		n.a.	n.a.
	215	59.6	n.a.	0.89486	n.a.		n.a.	n.a.
	216	59.7267	n.a.	1.92529	n.a.		n.a.	n.a.
	217	59.8367	n.a.	0.54093	n.a.		n.a.	n.a.
	218	59.9767	n.a.	0.18488	n.a.		n.a.	n.a.
	219	60.04	n.a.	0.03824	n.a.		n.a.	n.a.
	220	60.1333	n.a.	0.17309	n.a.		n.a.	n.a.
	221	60.2467	n.a.	0.03917	n.a.		n.a.	n.a.
	222	60.2933	n.a.	0.37036	n.a.		n.a.	n.a.
	223	60.42	n.a.	0.34168	n.a.		n.a.	n.a.
	224	60.5067	n.a.	0.67513	n.a.		n.a.	n.a.
	225	60.6733	n.a.	1.05183	n.a.		n.a.	n.a.
	226	60.7867	n.a.	0.15533	n.a.		n.a.	n.a.
	227	60.88	n.a.	0.65875	n.a.		n.a.	n.a.
	228	60.9467	n.a.	2.2918	n.a.		n.a.	n.a.
	229	61.0233	n.a.	63.6729	n.a.		n.a.	n.a.
	230	61.1833	n.a.	2.30616	n.a.		n.a.	n.a.
	231	61.2567	n.a.	1.529	n.a.		n.a.	n.a.
	232	61.5567	n.a.	0.06234	n.a.		n.a.	n.a.
	233	61.6833	n.a.	0.32755	n.a.		n.a.	n.a.
	234	61.74	n.a.	0.09772	n.a.		n.a.	n.a.
	235	61.8567	n.a.	10	n.a.		n.a.	n.a.
	236	61.9533	n.a.	0.05772	n.a.		n.a.	n.a.
	237	62.0867	n.a.	0.08002	n.a.		n.a.	n.a.
	238	62.1767	n.a.	0.03346	n.a.		n.a.	n.a.
	239	62.24	n.a.	0.01622	n.a.		n.a.	n.a.
	240	62.3267	n.a.	0.25781	n.a.		n.a.	n.a.
	241	62.3767	n.a.	0.02147	n.a.		n.a.	n.a.
	242	62.5567	n.a.	0.02556	n.a.		n.a.	n.a.
	243	62.6467	n.a.	0.63751	n.a.		n.a.	n.a.
	244	62.74	n.a.	33	n.a.		n.a.	n.a.
	245	62.9533	n.a.	0	n.a.		n.a.	n.a.
	246	63.4	n.a.	0	n.a.		n.a.	n.a.
	247	64.43	n.a.	0.00934	n.a.		n.a.	n.a.
	248	64.6467	n.a.	0.00014	n.a.		n.a.	n.a.
	249	64.88	n.a.	0.0105	n.a.		n.a.	n.a.
	250	64.9567	n.a.	0.00966	n.a.		n.a.	n.a.
	251	65.1	n.a.	0.01277	n.a.		n.a.	n.a.
	252	65.24	n.a.	0.00496	n.a.		n.a.	n.a.
	253	65.4067	n.a.	0.01119	n.a.		n.a.	n.a.
	254	65.93	n.a.	0.00042	n.a.		n.a.	n.a.
	255	66.06	n.a.	0.00312	n.a.		n.a.	n.a.
	256	67.3767	n.a.	0.0053	n.a.		n.a.	n.a.
	257	67.4933	n.a.	0.00856	n.a.		n.a.	n.a.
	258	67.5633	n.a.	0.01337	n.a.		n.a.	n.a.
	259	67.62	n.a.	0.0016	n.a.		n.a.	n.a.
	260	67.6533	n.a.	0.01215	n.a.		n.a.	n.a.
	261	67.7167	n.a.	0.01425	n.a.		n.a.	n.a.
	262	67.7967	n.a.	0.01197	n.a.		n.a.	n.a.
	263	67.8667	n.a.	0.00131	n.a.		n.a.	n.a.
	264	67.96	n.a.	0.00484	n.a.		n.a.	n.a.
	265	68.11	n.a.	0.012	n.a.		n.a.	n.a.
	266	68.2	n.a.	0.00631	n.a.		n.a.	n.a.
	267	68.2867	n.a.	0.00718	n.a.		n.a.	n.a.
	268	68.38	n.a.	0.00343	n.a.		n.a.	n.a.
	269	68.5367	n.a.	0.00681	n.a.		n.a.	n.a.
	270	68.6367	n.a.	0.00527	n.a.		n.a.	n.a.
	271	68.7	n.a.	0.00814	n.a.		n.a.	n.a.
	272	68.7667	n.a.	0.01211	n.a.		n.a.	n.a.
	273	68.8267	n.a.	0.01143	n.a.		n.a.	n.a.
	274	68.8933	n.a.	0.00591	n.a.		n.a.	n.a.
	275	68.9767	n.a.	0.00126	n.a.		n.a.	n.a.
	276	69.05	n.a.	0.00533	n.a.		n.a.	n.a.
	277	69.1333	n.a.	0.01441	n.a.		n.a.	n.a.
	278	69.19	n.a.	0.00953	n.a.		n.a.	n.a.
	279	69.2133	n.a.	0.00937	n.a.		n.a.	n.a.
	280	69.2767	n.a.	0.00338	n.a.		n.a.	n.a.
	281	69.32	n.a.	0.00271	n.a.		n.a.	n.a.
	282	69.35	n.a.	0.00033	n.a.		n.a.	n.a.
	283	69.3933	n.a.	0.00199	n.a.		n.a.	n.a.
	284	69.4433	n.a.	0.00388	n.a.		n.a.	n.a.
	285	69.52	n.a.	0.00065	n.a.		n.a.	n.a.
	286	69.5467	n.a.	0.00262	n.a.		n.a.	n.a.
	287	69.6533	n.a.	0.00413	n.a.		n.a.	n.a.
	288	69.73	n.a.	0.00245	n.a.		n.a.	n.a.
	289	69.84	n.a.	0.00934	n.a.		n.a.	n.a.
	290	69.9067	n.a.	0.00342	n.a.		n.a.	n.a.
	291	69.94	n.a.	0.00401	n.a.		n.a.	n.a.
	Total:			2069.87				n.a.

## Sheet: Stevia 3
	Sample Name:		Stevia 3			Injection Volume:		10
	Vial Number:		GB2			Channel:		UV_VIS_1
	Sample Type:		unknown			Wavelength:		320.0
	Control Program:		20200611 CQAs 1_5mlmin-1 70min			Bandwidth:		4
	Quantif. Method:		20200611 CQAs 1_5mlmin-1 70min			Dilution Factor:		1
	Recording Time:		2020-10-21 22:19:30			Sample Weight:		1
	Run Time (min):		70			Sample Amount:		1
	No.	Ret.Time	Peak Name	Height	Spectrum Name		Lib.Name	Match
		min		mAU	in Library			with Lib
	1	0.116667	n.a.	0.02216	n.a.		n.a.	n.a.
	2	0.153333	n.a.	0.00432	n.a.		n.a.	n.a.
	3	0.32	n.a.	0.00951	n.a.		n.a.	n.a.
	4	0.4	n.a.	0.01007	n.a.		n.a.	n.a.
	5	0.483333	n.a.	0.01176	n.a.		n.a.	n.a.
	6	0.556667	n.a.	0.0016	n.a.		n.a.	n.a.
	7	0.63	n.a.	0.01043	n.a.		n.a.	n.a.
	8	0.7	n.a.	0.00681	n.a.		n.a.	n.a.
	9	0.766667	n.a.	12	n.a.		n.a.	n.a.
	10	0.8	n.a.	0.00239	n.a.		n.a.	n.a.
	11	0.876667	n.a.	0.00819	n.a.		n.a.	n.a.
	12	0.923333	n.a.	0.00864	n.a.		n.a.	n.a.
	13	0.99	n.a.	0.00143	n.a.		n.a.	n.a.
	14	1.03667	n.a.	0.01349	n.a.		n.a.	n.a.
	15	1.07333	n.a.	0.01479	n.a.		n.a.	n.a.
	16	1.15333	n.a.	0.00103	n.a.		n.a.	n.a.
	17	1.31	n.a.	11	n.a.		n.a.	n.a.
	18	1.37667	n.a.	0.06512	n.a.		n.a.	n.a.
	19	1.48333	n.a.	0.24689	n.a.		n.a.	n.a.
	20	1.56333	n.a.	0.46228	n.a.		n.a.	n.a.
	21	1.62	n.a.	0.39838	n.a.		n.a.	n.a.
	22	1.73333	n.a.	15	n.a.		n.a.	n.a.
	23	1.83667	n.a.	13.9002	n.a.		n.a.	n.a.
	24	1.96	n.a.	0.1384	n.a.		n.a.	n.a.
	25	2.09	n.a.	0.73434	n.a.		n.a.	n.a.
	26	2.29333	n.a.	0.12779	n.a.		n.a.	n.a.
	27	2.44	n.a.	0.01515	n.a.		n.a.	n.a.
	28	2.47333	n.a.	0.00104	n.a.		n.a.	n.a.
	29	2.54333	n.a.	0.01419	n.a.		n.a.	n.a.
	30	2.59333	n.a.	0.01355	n.a.		n.a.	n.a.
	31	2.66	n.a.	0.00371	n.a.		n.a.	n.a.
	32	2.68667	n.a.	0.00049	n.a.		n.a.	n.a.
	33	2.83333	n.a.	0.04189	n.a.		n.a.	n.a.
	34	3.11	n.a.	0.12023	n.a.		n.a.	n.a.
	35	3.72	n.a.	0.0835	n.a.		n.a.	n.a.
	36	4.00667	n.a.	0.0026	n.a.		n.a.	n.a.
	37	4.14	n.a.	0.01112	n.a.		n.a.	n.a.
	38	4.26667	n.a.	0.00426	n.a.		n.a.	n.a.
	39	4.39	n.a.	0.01154	n.a.		n.a.	n.a.
	40	4.57333	n.a.	0.01705	n.a.		n.a.	n.a.
	41	4.61667	1-CQA	0.00426	n.a.		n.a.	n.a.
	42	5.66333	n.a.	0.01154	n.a.		n.a.	n.a.
	43	6.77667	n.a.	0.00324	n.a.		n.a.	n.a.
	44	7.94667	3-CQA	36.8	n.a.		n.a.	n.a.
	45	9.11667	n.a.	0.00324	n.a.		n.a.	n.a.
	46	9.20667	n.a.	0.00505	n.a.		n.a.	n.a.
	47	9.32667	n.a.	0.00392	n.a.		n.a.	n.a.
	48	9.40333	n.a.	0.0029	n.a.		n.a.	n.a.
	49	9.47	n.a.	0.0038	n.a.		n.a.	n.a.
	50	9.57667	n.a.	0.01504	n.a.		n.a.	n.a.
	51	9.68333	n.a.	0.01985	n.a.		n.a.	n.a.
	52	9.72667	n.a.	0.0034	n.a.		n.a.	n.a.
	53	9.95	n.a.	0.00603	n.a.		n.a.	n.a.
	54	10.6933	n.a.	0.37577	n.a.		n.a.	n.a.
	55	10.99	n.a.	0.30478	n.a.		n.a.	n.a.
	56	11.3833	n.a.	0.01043	n.a.		n.a.	n.a.
	57	11.45	n.a.	0.00643	n.a.		n.a.	n.a.
	58	11.64	n.a.	0.00488	n.a.		n.a.	n.a.
	59	11.6967	n.a.	0.01123	n.a.		n.a.	n.a.
	60	11.8067	n.a.	0.02873	n.a.		n.a.	n.a.
	61	12.5433	n.a.	0.32992	n.a.		n.a.	n.a.
	62	12.9367	n.a.	0.01324	n.a.		n.a.	n.a.
	63	13.0467	n.a.	0.00557	n.a.		n.a.	n.a.
	64	13.1133	n.a.	0.00197	n.a.		n.a.	n.a.
	65	13.1867	n.a.	0.00555	n.a.		n.a.	n.a.
	66	13.2567	n.a.	0.00381	n.a.		n.a.	n.a.
	67	13.3867	n.a.	0.00927	n.a.		n.a.	n.a.
	68	13.55	n.a.	0.00729	n.a.		n.a.	n.a.
	69	13.7067	n.a.	0.00786	n.a.		n.a.	n.a.
	70	13.8133	n.a.	0.00552	n.a.		n.a.	n.a.
	71	13.8633	n.a.	0.00622	n.a.		n.a.	n.a.
	72	14.0833	n.a.	0.00958	n.a.		n.a.	n.a.
	73	14.2433	n.a.	0.00927	n.a.		n.a.	n.a.
	74	14.32	n.a.	0.01171	n.a.		n.a.	n.a.
	75	14.4033	n.a.	0.00331	n.a.		n.a.	n.a.
	76	14.5167	n.a.	0.00758	n.a.		n.a.	n.a.
	77	14.6067	n.a.	0.00507	n.a.		n.a.	n.a.
	78	14.6967	n.a.	0.00184	n.a.		n.a.	n.a.
	79	14.7433	n.a.	0.00182	n.a.		n.a.	n.a.
	80	14.7967	n.a.	0.01047	n.a.		n.a.	n.a.
	81	14.87	n.a.	0.00925	n.a.		n.a.	n.a.
	82	14.9967	n.a.	0.00562	n.a.		n.a.	n.a.
	83	15.08	n.a.	0.00696	n.a.		n.a.	n.a.
	84	15.9133	n.a.	0.76406	n.a.		n.a.	n.a.
	85	16.39	n.a.	0.12479	n.a.		n.a.	n.a.
	86	16.4533	n.a.	0.00848	n.a.		n.a.	n.a.
	87	16.7067	n.a.	0.00215	n.a.		n.a.	n.a.
	88	16.8067	n.a.	0.00715	n.a.		n.a.	n.a.
	89	16.8933	n.a.	0.02494	n.a.		n.a.	n.a.
	90	17.5967	5-CQA	300	n.a.		n.a.	n.a.
	91	18.19	n.a.	0.22119	n.a.		n.a.	n.a.
	92	18.5333	n.a.	0.28813	n.a.		n.a.	n.a.
	93	18.8967	n.a.	0.14315	n.a.		n.a.	n.a.
	94	20.8533	4-CQA	32.7	n.a.		n.a.	n.a.
	95	23.7567	n.a.	0.06456	n.a.		n.a.	n.a.
	96	23.8233	n.a.	0.00629	n.a.		n.a.	n.a.
	97	23.9267	n.a.	0.00727	n.a.		n.a.	n.a.
	98	24	n.a.	0.0056	n.a.		n.a.	n.a.
	99	24.1533	n.a.	0.0044	n.a.		n.a.	n.a.
	100	24.2633	n.a.	0.00523	n.a.		n.a.	n.a.
	101	24.3233	n.a.	0.00501	n.a.		n.a.	n.a.
	102	24.44	n.a.	0.0078	n.a.		n.a.	n.a.
	103	24.5	n.a.	0.00167	n.a.		n.a.	n.a.
	104	24.5367	n.a.	0.00914	n.a.		n.a.	n.a.
	105	24.6533	n.a.	0.01594	n.a.		n.a.	n.a.
	106	24.73	n.a.	0.0017	n.a.		n.a.	n.a.
	107	24.79	n.a.	0.0055	n.a.		n.a.	n.a.
	108	24.9033	n.a.	0.0059	n.a.		n.a.	n.a.
	109	24.95	n.a.	0.04093	n.a.		n.a.	n.a.
	110	25.1033	n.a.	0.00316	n.a.		n.a.	n.a.
	111	25.1667	n.a.	0.00386	n.a.		n.a.	n.a.
	112	25.26	n.a.	0.01501	n.a.		n.a.	n.a.
	113	25.6167	n.a.	0.1395	n.a.		n.a.	n.a.
	114	25.9067	n.a.	0.19557	n.a.		n.a.	n.a.
	115	26.3033	n.a.	0.00384	n.a.		n.a.	n.a.
	116	26.54	n.a.	0.09131	n.a.		n.a.	n.a.
	117	26.57	n.a.	0.00346	n.a.		n.a.	n.a.
	118	27.0533	n.a.	6.52146	n.a.		n.a.	n.a.
	119	27.5767	n.a.	0.63631	n.a.		n.a.	n.a.
	120	27.98	n.a.	0.84296	n.a.		n.a.	n.a.
	121	28.2233	Puerarin	400.87	n.a.		n.a.	n.a.
	122	28.6633	n.a.	1.25929	n.a.		n.a.	n.a.
	123	28.9733	n.a.	6.7933	n.a.		n.a.	n.a.
	124	29.2567	n.a.	0.11938	n.a.		n.a.	n.a.
	125	29.5767	n.a.	0.72418	n.a.		n.a.	n.a.
	126	30.1233	n.a.	2.32104	n.a.		n.a.	n.a.
	127	30.4067	n.a.	0.11891	n.a.		n.a.	n.a.
	128	30.6533	1,3-diCQA	0.11938	n.a.		n.a.	n.a.
	129	31.11	n.a.	0.30755	n.a.		n.a.	n.a.
	130	31.3667	n.a.	4.2455	n.a.		n.a.	n.a.
	131	31.7933	n.a.	0.54235	n.a.		n.a.	n.a.
	132	32.11	n.a.	2.22482	n.a.		n.a.	n.a.
	133	32.32	n.a.	1.79493	n.a.		n.a.	n.a.
	134	32.5233	n.a.	1.74639	n.a.		n.a.	n.a.
	135	32.5833	n.a.	0.09555	n.a.		n.a.	n.a.
	136	32.75	n.a.	0.31201	n.a.		n.a.	n.a.
	137	33.29	n.a.	0.23199	n.a.		n.a.	n.a.
	138	33.48	n.a.	1.83735	n.a.		n.a.	n.a.
	139	33.7467	n.a.	0.06597	n.a.		n.a.	n.a.
	140	33.9333	n.a.	0.21948	n.a.		n.a.	n.a.
	141	34.4267	n.a.	1.34783	n.a.		n.a.	n.a.
	142	34.8067	n.a.	0.06397	n.a.		n.a.	n.a.
	143	35.0667	n.a.	1.90957	n.a.		n.a.	n.a.
	144	35.8967	n.a.	1.39762	n.a.		n.a.	n.a.
	145	36.3133	1,4 diCQA	0.09555	n.a.		n.a.	n.a.
	146	37.0333	n.a.	0.05518	n.a.		n.a.	n.a.
	147	37.3467	n.a.	3.68962	n.a.		n.a.	n.a.
	148	38.0433	n.a.	1.21947	n.a.		n.a.	n.a.
	149	38.4533	n.a.	0.94338	n.a.		n.a.	n.a.
	150	38.91	n.a.	3.70031	n.a.		n.a.	n.a.
	151	39.5767	n.a.	0.25735	n.a.		n.a.	n.a.
	152	40.4567	n.a.	123.98	n.a.		n.a.	n.a.
	153	40.93	3,4 diCQA	140.8	n.a.		n.a.	n.a.
	154	41.7933	n.a.	0.0004	n.a.		n.a.	n.a.
	155	42.3433	n.a.	20.3013	n.a.		n.a.	n.a.
	156	42.7967	1,5 diCQA	0.94338	n.a.		n.a.	n.a.
	157	44.12	n.a.	0.00998	n.a.		n.a.	n.a.
	158	44.2267	n.a.	0.00751	n.a.		n.a.	n.a.
	159	45.3567	3,5 diCQA	490	n.a.		n.a.	n.a.
	160	46.65	n.a.	55.2629	n.a.		n.a.	n.a.
	161	47.92	n.a.	0.00132	n.a.		n.a.	n.a.
	162	48.18	n.a.	1.15183	n.a.		n.a.	n.a.
	163	49.96	n.a.	2.31593	n.a.		n.a.	n.a.
	164	50.9667	n.a.	1.57016	n.a.		n.a.	n.a.
	165	51.69	n.a.	0.00451	n.a.		n.a.	n.a.
	166	52.61	n.a.	0.34128	n.a.		n.a.	n.a.
	167	52.7333	n.a.	0.00479	n.a.		n.a.	n.a.
	168	52.7967	n.a.	0.00317	n.a.		n.a.	n.a.
	169	52.85	n.a.	0.0202	n.a.		n.a.	n.a.
	170	53.28	n.a.	0.0002	n.a.		n.a.	n.a.
	171	53.4367	n.a.	0.00265	n.a.		n.a.	n.a.
	172	53.53	n.a.	0.01165	n.a.		n.a.	n.a.
	173	53.5933	n.a.	0.00227	n.a.		n.a.	n.a.
	174	53.6567	n.a.	0.0009	n.a.		n.a.	n.a.
	175	53.6933	n.a.	0.02148	n.a.		n.a.	n.a.
	176	53.84	n.a.	0.00304	n.a.		n.a.	n.a.
	177	53.8967	n.a.	0.02806	n.a.		n.a.	n.a.
	178	53.94	n.a.	0.0052	n.a.		n.a.	n.a.
	179	54.1667	n.a.	0.00873	n.a.		n.a.	n.a.
	180	54.3167	n.a.	0.00958	n.a.		n.a.	n.a.
	181	54.3833	n.a.	0.00598	n.a.		n.a.	n.a.
	182	54.4367	n.a.	0.00031	n.a.		n.a.	n.a.
	183	54.5733	n.a.	0.01272	n.a.		n.a.	n.a.
	184	54.6367	n.a.	0.01999	n.a.		n.a.	n.a.
	185	54.6967	n.a.	0.00082	n.a.		n.a.	n.a.
	186	54.9733	n.a.	0.02057	n.a.		n.a.	n.a.
	187	55.04	n.a.	0.0195	n.a.		n.a.	n.a.
	188	55.13	n.a.	0.0069	n.a.		n.a.	n.a.
	189	55.1767	n.a.	0.00642	n.a.		n.a.	n.a.
	190	55.2233	n.a.	0.00739	n.a.		n.a.	n.a.
	191	55.2767	n.a.	0.00904	n.a.		n.a.	n.a.
	192	55.3433	n.a.	0.00982	n.a.		n.a.	n.a.
	193	55.4433	n.a.	0.00579	n.a.		n.a.	n.a.
	194	55.5167	n.a.	0.00164	n.a.		n.a.	n.a.
	195	55.6233	n.a.	0.00601	n.a.		n.a.	n.a.
	196	55.71	n.a.	0.01233	n.a.		n.a.	n.a.
	197	55.7767	n.a.	0.00339	n.a.		n.a.	n.a.
	198	55.91	n.a.	0.00394	n.a.		n.a.	n.a.
	199	56.9433	4,5 diCQA	120.6	n.a.		n.a.	n.a.
	200	57.79	n.a.	4.14958	n.a.		n.a.	n.a.
	201	57.8933	n.a.	60.1993	n.a.		n.a.	n.a.
	202	57.9933	n.a.	0.00339	n.a.		n.a.	n.a.
	203	58.1067	n.a.	0.00339	n.a.		n.a.	n.a.
	204	58.3367	n.a.	0	n.a.		n.a.	n.a.
	205	58.52	n.a.	0.39699	n.a.		n.a.	n.a.
	206	58.6	n.a.	1.98256	n.a.		n.a.	n.a.
	207	58.7667	n.a.	21.9	n.a.		n.a.	n.a.
	208	58.8467	n.a.	0.14476	n.a.		n.a.	n.a.
	209	58.99	n.a.	4.28941	n.a.		n.a.	n.a.
	210	59.14	n.a.	0.22551	n.a.		n.a.	n.a.
	211	59.24	n.a.	6.2366	n.a.		n.a.	n.a.
	212	59.39	n.a.	0.25154	n.a.		n.a.	n.a.
	213	59.4833	n.a.	3.77971	n.a.		n.a.	n.a.
	214	59.5667	n.a.	0.09293	n.a.		n.a.	n.a.
	215	59.6	n.a.	0.89486	n.a.		n.a.	n.a.
	216	59.7267	n.a.	13	n.a.		n.a.	n.a.
	217	59.8367	n.a.	0.54093	n.a.		n.a.	n.a.
	218	59.9767	n.a.	0.18488	n.a.		n.a.	n.a.
	219	60.04	n.a.	0.03824	n.a.		n.a.	n.a.
	220	60.1333	n.a.	0.17309	n.a.		n.a.	n.a.
	221	60.2467	n.a.	0.03917	n.a.		n.a.	n.a.
	222	60.2933	n.a.	0.37036	n.a.		n.a.	n.a.
	223	60.42	n.a.	0.34168	n.a.		n.a.	n.a.
	224	60.5067	n.a.	0.67513	n.a.		n.a.	n.a.
	225	60.6733	n.a.	1.05183	n.a.		n.a.	n.a.
	226	60.7867	n.a.	0.15533	n.a.		n.a.	n.a.
	227	60.88	n.a.	0.65875	n.a.		n.a.	n.a.
	228	60.9467	n.a.	44	n.a.		n.a.	n.a.
	229	61.0233	n.a.	63.6729	n.a.		n.a.	n.a.
	230	61.1833	n.a.	2.30616	n.a.		n.a.	n.a.
	231	61.2567	n.a.	1.529	n.a.		n.a.	n.a.
	232	61.5567	n.a.	0.06234	n.a.		n.a.	n.a.
	233	61.6833	n.a.	0.32755	n.a.		n.a.	n.a.
	234	61.74	n.a.	0.09772	n.a.		n.a.	n.a.
	235	61.8567	n.a.	0.38617	n.a.		n.a.	n.a.
	236	61.9533	n.a.	0.05772	n.a.		n.a.	n.a.
	237	62.0867	n.a.	0.08002	n.a.		n.a.	n.a.
	238	62.1767	n.a.	0.03346	n.a.		n.a.	n.a.
	239	62.24	n.a.	0.01622	n.a.		n.a.	n.a.
	240	62.3267	n.a.	0.25781	n.a.		n.a.	n.a.
	241	62.3767	n.a.	0.02147	n.a.		n.a.	n.a.
	242	62.5567	n.a.	0.02556	n.a.		n.a.	n.a.
	243	62.6467	n.a.	16	n.a.		n.a.	n.a.
	244	62.74	n.a.	16.3284	n.a.		n.a.	n.a.
	245	62.9533	n.a.	1.73053	n.a.		n.a.	n.a.
	246	63.4	n.a.	18	n.a.		n.a.	n.a.
	247	64.43	n.a.	0.00934	n.a.		n.a.	n.a.
	248	64.6467	n.a.	0.00014	n.a.		n.a.	n.a.
	249	64.88	n.a.	0.0105	n.a.		n.a.	n.a.
	250	64.9567	n.a.	0.00966	n.a.		n.a.	n.a.
	251	65.1	n.a.	0.01277	n.a.		n.a.	n.a.
	252	65.24	n.a.	0.00496	n.a.		n.a.	n.a.
	253	65.4067	n.a.	0.01119	n.a.		n.a.	n.a.
	254	65.93	n.a.	0.00042	n.a.		n.a.	n.a.
	255	66.06	n.a.	0.00312	n.a.		n.a.	n.a.
	256	67.3767	n.a.	0.0053	n.a.		n.a.	n.a.
	257	67.4933	n.a.	0.00856	n.a.		n.a.	n.a.
	258	67.5633	n.a.	0.01337	n.a.		n.a.	n.a.
	259	67.62	n.a.	0.0016	n.a.		n.a.	n.a.
	260	67.6533	n.a.	0.01215	n.a.		n.a.	n.a.
	261	67.7167	n.a.	0.01425	n.a.		n.a.	n.a.
	262	67.7967	n.a.	0.01197	n.a.		n.a.	n.a.
	263	67.8667	n.a.	0.00131	n.a.		n.a.	n.a.
	264	67.96	n.a.	0.00484	n.a.		n.a.	n.a.
	265	68.11	n.a.	0.012	n.a.		n.a.	n.a.
	266	68.2	n.a.	0.00631	n.a.		n.a.	n.a.
	267	68.2867	n.a.	0.00718	n.a.		n.a.	n.a.
	268	68.38	n.a.	0.00343	n.a.		n.a.	n.a.
	269	68.5367	n.a.	0.00681	n.a.		n.a.	n.a.
	270	68.6367	n.a.	0.00527	n.a.		n.a.	n.a.
	271	68.7	n.a.	0.00814	n.a.		n.a.	n.a.
	272	68.7667	n.a.	0.01211	n.a.		n.a.	n.a.
	273	68.8267	n.a.	0.01143	n.a.		n.a.	n.a.
	274	68.8933	n.a.	0.00591	n.a.		n.a.	n.a.
	275	68.9767	n.a.	0.00126	n.a.		n.a.	n.a.
	276	69.05	n.a.	0.00533	n.a.		n.a.	n.a.
	277	69.1333	n.a.	0.01441	n.a.		n.a.	n.a.
	278	69.19	n.a.	0.00953	n.a.		n.a.	n.a.
	279	69.2133	n.a.	0.00937	n.a.		n.a.	n.a.
	280	69.2767	n.a.	0.00338	n.a.		n.a.	n.a.
	281	69.32	n.a.	0.00271	n.a.		n.a.	n.a.
	282	69.35	n.a.	0.00033	n.a.		n.a.	n.a.
	283	69.3933	n.a.	0.00199	n.a.		n.a.	n.a.
	284	69.4433	n.a.	0.00388	n.a.		n.a.	n.a.
	285	69.52	n.a.	0.00065	n.a.		n.a.	n.a.
	286	69.5467	n.a.	0.00262	n.a.		n.a.	n.a.
	287	69.6533	n.a.	0.00413	n.a.		n.a.	n.a.
	288	69.73	n.a.	0.00245	n.a.		n.a.	n.a.
	289	69.84	n.a.	0.00934	n.a.		n.a.	n.a.
	290	69.9067	n.a.	0.00342	n.a.		n.a.	n.a.
	291	69.94	n.a.	0.00401	n.a.		n.a.	n.a.
	Total:			2120.77				n.a.

## Sheet: Pluchea 3
	Sample Name:		Pluchea indica 3			Injection Volume:		10
	Vial Number:		GB3			Channel:		UV_VIS_1
	Sample Type:		unknown			Wavelength:		320.0
	Control Program:		20200611 CQAs 1_5mlmin-1 70min			Bandwidth:		4
	Quantif. Method:		20200611 CQAs 1_5mlmin-1 70min			Dilution Factor:		1
	Recording Time:		2020-10-21 22:19:30			Sample Weight:		1
	Run Time (min):		70			Sample Amount:		1
	No.	Ret.Time	Peak Name	Height	Spectrum Name		Lib.Name	Match
		min		mAU	in Library			with Lib
	1	0.116667	n.a.	0.02216	n.a.		n.a.	n.a.
	2	0.153333	n.a.	0.00432	n.a.		n.a.	n.a.
	3	0.32	n.a.	0.00951	n.a.		n.a.	n.a.
	4	0.4	n.a.	0.01007	n.a.		n.a.	n.a.
	5	0.483333	n.a.	0.01176	n.a.		n.a.	n.a.
	6	0.556667	n.a.	0.0016	n.a.		n.a.	n.a.
	7	0.63	n.a.	0.01043	n.a.		n.a.	n.a.
	8	0.7	n.a.	0.00681	n.a.		n.a.	n.a.
	9	0.766667	n.a.	0.00099	n.a.		n.a.	n.a.
	10	0.8	n.a.	0.00239	n.a.		n.a.	n.a.
	11	0.876667	n.a.	0.00819	n.a.		n.a.	n.a.
	12	0.923333	n.a.	0.00864	n.a.		n.a.	n.a.
	13	0.99	n.a.	0.00143	n.a.		n.a.	n.a.
	14	1.03667	n.a.	0.01349	n.a.		n.a.	n.a.
	15	1.07333	n.a.	0.01479	n.a.		n.a.	n.a.
	16	1.15333	n.a.	0.00103	n.a.		n.a.	n.a.
	17	1.31	n.a.	0.05742	n.a.		n.a.	n.a.
	18	1.37667	n.a.	0.06512	n.a.		n.a.	n.a.
	19	1.48333	n.a.	12.7	n.a.		n.a.	n.a.
	20	1.56333	n.a.	0	n.a.		n.a.	n.a.
	21	1.62	n.a.	0.39838	n.a.		n.a.	n.a.
	22	1.73333	n.a.	1.19868	n.a.		n.a.	n.a.
	23	1.83667	n.a.	13.9002	n.a.		n.a.	n.a.
	24	1.96	n.a.	0.1384	n.a.		n.a.	n.a.
	25	2.09	n.a.	22.88	n.a.		n.a.	n.a.
	26	2.29333	n.a.	0.12779	n.a.		n.a.	n.a.
	27	2.44	n.a.	0.01515	n.a.		n.a.	n.a.
	28	2.47333	n.a.	0.00104	n.a.		n.a.	n.a.
	29	2.54333	n.a.	0	n.a.		n.a.	n.a.
	30	2.59333	n.a.	0	n.a.		n.a.	n.a.
	31	2.66	n.a.	0.00371	n.a.		n.a.	n.a.
	32	2.68667	n.a.	0.00049	n.a.		n.a.	n.a.
	33	2.83333	n.a.	0.04189	n.a.		n.a.	n.a.
	34	3.11	n.a.	0.12023	n.a.		n.a.	n.a.
	35	3.72	n.a.	0.0835	n.a.		n.a.	n.a.
	36	4.00667	n.a.	0.0026	n.a.		n.a.	n.a.
	37	4.14	n.a.	0.01112	n.a.		n.a.	n.a.
	38	4.26667	n.a.	0.00426	n.a.		n.a.	n.a.
	39	4.39	n.a.	0.01154	n.a.		n.a.	n.a.
	40	4.57333	n.a.	0.01705	n.a.		n.a.	n.a.
	41	4.61667	1-CQA	0.00426	n.a.		n.a.	n.a.
	42	5.66333	n.a.	0.01154	n.a.		n.a.	n.a.
	43	6.77667	n.a.	0.00324	n.a.		n.a.	n.a.
	44	7.94667	3-CQA	9.99	n.a.		n.a.	n.a.
	45	9.11667	n.a.	0.00324	n.a.		n.a.	n.a.
	46	9.20667	n.a.	0.00505	n.a.		n.a.	n.a.
	47	9.32667	n.a.	0.00392	n.a.		n.a.	n.a.
	48	9.40333	n.a.	0.0029	n.a.		n.a.	n.a.
	49	9.47	n.a.	0.0038	n.a.		n.a.	n.a.
	50	9.57667	n.a.	0.01504	n.a.		n.a.	n.a.
	51	9.68333	n.a.	0.01985	n.a.		n.a.	n.a.
	52	9.72667	n.a.	0.0034	n.a.		n.a.	n.a.
	53	9.95	n.a.	0.00603	n.a.		n.a.	n.a.
	54	10.6933	n.a.	0.37577	n.a.		n.a.	n.a.
	55	10.99	n.a.	0.30478	n.a.		n.a.	n.a.
	56	11.3833	n.a.	0.01043	n.a.		n.a.	n.a.
	57	11.45	n.a.	0.00643	n.a.		n.a.	n.a.
	58	11.64	n.a.	0.00488	n.a.		n.a.	n.a.
	59	11.6967	n.a.	0.01123	n.a.		n.a.	n.a.
	60	11.8067	n.a.	0.02873	n.a.		n.a.	n.a.
	61	12.5433	n.a.	0.32992	n.a.		n.a.	n.a.
	62	12.9367	n.a.	0.01324	n.a.		n.a.	n.a.
	63	13.0467	n.a.	0.00557	n.a.		n.a.	n.a.
	64	13.1133	n.a.	0.00197	n.a.		n.a.	n.a.
	65	13.1867	n.a.	0.00555	n.a.		n.a.	n.a.
	66	13.2567	n.a.	0.00381	n.a.		n.a.	n.a.
	67	13.3867	n.a.	0.00927	n.a.		n.a.	n.a.
	68	13.55	n.a.	0.00729	n.a.		n.a.	n.a.
	69	13.7067	n.a.	0	n.a.		n.a.	n.a.
	70	13.8133	n.a.	0.00552	n.a.		n.a.	n.a.
	71	13.8633	n.a.	0.00622	n.a.		n.a.	n.a.
	72	14.0833	n.a.	0.00958	n.a.		n.a.	n.a.
	73	14.2433	n.a.	0.00927	n.a.		n.a.	n.a.
	74	14.32	n.a.	0	n.a.		n.a.	n.a.
	75	14.4033	n.a.	0.00331	n.a.		n.a.	n.a.
	76	14.5167	n.a.	0.00758	n.a.		n.a.	n.a.
	77	14.6067	n.a.	0.00507	n.a.		n.a.	n.a.
	78	14.6967	n.a.	0.00184	n.a.		n.a.	n.a.
	79	14.7433	n.a.	0	n.a.		n.a.	n.a.
	80	14.7967	n.a.	0.01047	n.a.		n.a.	n.a.
	81	14.87	n.a.	0.00925	n.a.		n.a.	n.a.
	82	14.9967	n.a.	0.00562	n.a.		n.a.	n.a.
	83	15.08	n.a.	0.00696	n.a.		n.a.	n.a.
	84	15.9133	n.a.	0.76406	n.a.		n.a.	n.a.
	85	16.39	n.a.	0.12479	n.a.		n.a.	n.a.
	86	16.4533	n.a.	0.00848	n.a.		n.a.	n.a.
	87	16.7067	n.a.	0.00215	n.a.		n.a.	n.a.
	88	16.8067	n.a.	0.00715	n.a.		n.a.	n.a.
	89	16.8933	n.a.	0.02494	n.a.		n.a.	n.a.
	90	17.5967	5-CQA	390.87	n.a.		n.a.	n.a.
	91	18.19	n.a.	0.22119	n.a.		n.a.	n.a.
	92	18.5333	n.a.	0.28813	n.a.		n.a.	n.a.
	93	18.8967	n.a.	0.14315	n.a.		n.a.	n.a.
	94	20.8533	4-CQA	0	n.a.		n.a.	n.a.
	95	23.7567	n.a.	0.06456	n.a.		n.a.	n.a.
	96	23.8233	n.a.	0.00629	n.a.		n.a.	n.a.
	97	23.9267	n.a.	0.00727	n.a.		n.a.	n.a.
	98	24	n.a.	0.0056	n.a.		n.a.	n.a.
	99	24.1533	n.a.	0.0044	n.a.		n.a.	n.a.
	100	24.2633	n.a.	0.00523	n.a.		n.a.	n.a.
	101	24.3233	n.a.	0.00501	n.a.		n.a.	n.a.
	102	24.44	n.a.	0.0078	n.a.		n.a.	n.a.
	103	24.5	n.a.	0.00167	n.a.		n.a.	n.a.
	104	24.5367	n.a.	0.00914	n.a.		n.a.	n.a.
	105	24.6533	n.a.	0.01594	n.a.		n.a.	n.a.
	106	24.73	n.a.	0.0017	n.a.		n.a.	n.a.
	107	24.79	n.a.	0.0055	n.a.		n.a.	n.a.
	108	24.9033	n.a.	0.0059	n.a.		n.a.	n.a.
	109	24.95	n.a.	0.04093	n.a.		n.a.	n.a.
	110	25.1033	n.a.	0.00316	n.a.		n.a.	n.a.
	111	25.1667	n.a.	0.00386	n.a.		n.a.	n.a.
	112	25.26	n.a.	0.01501	n.a.		n.a.	n.a.
	113	25.6167	n.a.	0.1395	n.a.		n.a.	n.a.
	114	25.9067	n.a.	0	n.a.		n.a.	n.a.
	115	26.3033	n.a.	0.00384	n.a.		n.a.	n.a.
	116	26.54	n.a.	0.09131	n.a.		n.a.	n.a.
	117	26.57	n.a.	0.00346	n.a.		n.a.	n.a.
	118	27.0533	n.a.	0	n.a.		n.a.	n.a.
	119	27.5767	n.a.	0.63631	n.a.		n.a.	n.a.
	120	27.98	n.a.	0.84296	n.a.		n.a.	n.a.
	121	28.2233	Puerarin	400.87	n.a.		n.a.	n.a.
	122	28.6633	n.a.	1.25929	n.a.		n.a.	n.a.
	123	28.9733	n.a.	0	n.a.		n.a.	n.a.
	124	29.2567	n.a.	0.11938	n.a.		n.a.	n.a.
	125	29.5767	n.a.	0.72418	n.a.		n.a.	n.a.
	126	30.1233	n.a.	2.32104	n.a.		n.a.	n.a.
	127	30.4067	n.a.	0.11891	n.a.		n.a.	n.a.
	128	30.6533	1,3-diCQA	2.77	n.a.		n.a.	n.a.
	129	31.11	n.a.	0.30755	n.a.		n.a.	n.a.
	130	31.3667	n.a.	4.2455	n.a.		n.a.	n.a.
	131	31.7933	n.a.	0.54235	n.a.		n.a.	n.a.
	132	32.11	n.a.	2.22482	n.a.		n.a.	n.a.
	133	32.32	n.a.	1.79493	n.a.		n.a.	n.a.
	134	32.5233	n.a.	1.74639	n.a.		n.a.	n.a.
	135	32.5833	n.a.	0.09555	n.a.		n.a.	n.a.
	136	32.75	n.a.	0.31201	n.a.		n.a.	n.a.
	137	33.29	n.a.	0.23199	n.a.		n.a.	n.a.
	138	33.48	n.a.	1.83735	n.a.		n.a.	n.a.
	139	33.7467	n.a.	0.06597	n.a.		n.a.	n.a.
	140	33.9333	n.a.	0.21948	n.a.		n.a.	n.a.
	141	34.4267	n.a.	1.34783	n.a.		n.a.	n.a.
	142	34.8067	n.a.	0.06397	n.a.		n.a.	n.a.
	143	35.0667	n.a.	1.90957	n.a.		n.a.	n.a.
	144	35.8967	n.a.	1.39762	n.a.		n.a.	n.a.
	145	36.3133	1,4 diCQA	0.09555	n.a.		n.a.	n.a.
	146	37.0333	n.a.	0.05518	n.a.		n.a.	n.a.
	147	37.3467	n.a.	3.68962	n.a.		n.a.	n.a.
	148	38.0433	n.a.	1.21947	n.a.		n.a.	n.a.
	149	38.4533	n.a.	0.94338	n.a.		n.a.	n.a.
	150	38.91	n.a.	3.70031	n.a.		n.a.	n.a.
	151	39.5767	n.a.	0.25735	n.a.		n.a.	n.a.
	152	40.4567	n.a.	133	n.a.		n.a.	n.a.
	153	40.93	3,4 diCQA	68.98	n.a.		n.a.	n.a.
	154	41.7933	n.a.	0.0004	n.a.		n.a.	n.a.
	155	42.3433	n.a.	20.3013	n.a.		n.a.	n.a.
	156	42.7967	1,5 diCQA	0.94338	n.a.		n.a.	n.a.
	157	44.12	n.a.	0.00998	n.a.		n.a.	n.a.
	158	44.2267	n.a.	0.00751	n.a.		n.a.	n.a.
	159	45.3567	3,5 diCQA	543	n.a.		n.a.	n.a.
	160	46.65	n.a.	33	n.a.		n.a.	n.a.
	161	47.92	n.a.	0.00132	n.a.		n.a.	n.a.
	162	48.18	n.a.	1.15183	n.a.		n.a.	n.a.
	163	49.96	n.a.	2.31593	n.a.		n.a.	n.a.
	164	50.9667	n.a.	1.57016	n.a.		n.a.	n.a.
	165	51.69	n.a.	0.00451	n.a.		n.a.	n.a.
	166	52.61	n.a.	0.34128	n.a.		n.a.	n.a.
	167	52.7333	n.a.	0.00479	n.a.		n.a.	n.a.
	168	52.7967	n.a.	0.00317	n.a.		n.a.	n.a.
	169	52.85	n.a.	0.0202	n.a.		n.a.	n.a.
	170	53.28	n.a.	0.0002	n.a.		n.a.	n.a.
	171	53.4367	n.a.	0.00265	n.a.		n.a.	n.a.
	172	53.53	n.a.	0.01165	n.a.		n.a.	n.a.
	173	53.5933	n.a.	0.00227	n.a.		n.a.	n.a.
	174	53.6567	n.a.	0.0009	n.a.		n.a.	n.a.
	175	53.6933	n.a.	0.02148	n.a.		n.a.	n.a.
	176	53.84	n.a.	0.00304	n.a.		n.a.	n.a.
	177	53.8967	n.a.	0.02806	n.a.		n.a.	n.a.
	178	53.94	n.a.	0.0052	n.a.		n.a.	n.a.
	179	54.1667	n.a.	0.00873	n.a.		n.a.	n.a.
	180	54.3167	n.a.	0.00958	n.a.		n.a.	n.a.
	181	54.3833	n.a.	0.00598	n.a.		n.a.	n.a.
	182	54.4367	n.a.	0.00031	n.a.		n.a.	n.a.
	183	54.5733	n.a.	0.01272	n.a.		n.a.	n.a.
	184	54.6367	n.a.	0.01999	n.a.		n.a.	n.a.
	185	54.6967	n.a.	0.00082	n.a.		n.a.	n.a.
	186	54.9733	n.a.	0.02057	n.a.		n.a.	n.a.
	187	55.04	n.a.	0.0195	n.a.		n.a.	n.a.
	188	55.13	n.a.	0.0069	n.a.		n.a.	n.a.
	189	55.1767	n.a.	0.00642	n.a.		n.a.	n.a.
	190	55.2233	n.a.	0.00739	n.a.		n.a.	n.a.
	191	55.2767	n.a.	0.00904	n.a.		n.a.	n.a.
	192	55.3433	n.a.	0.00982	n.a.		n.a.	n.a.
	193	55.4433	n.a.	0.00579	n.a.		n.a.	n.a.
	194	55.5167	n.a.	0.00164	n.a.		n.a.	n.a.
	195	55.6233	n.a.	0.00601	n.a.		n.a.	n.a.
	196	55.71	n.a.	0.01233	n.a.		n.a.	n.a.
	197	55.7767	n.a.	0.00339	n.a.		n.a.	n.a.
	198	55.91	n.a.	0.00394	n.a.		n.a.	n.a.
	199	56.9433	4,5 diCQA	78	n.a.		n.a.	n.a.
	200	57.79	n.a.	4.14958	n.a.		n.a.	n.a.
	201	57.8933	n.a.	0	n.a.		n.a.	n.a.
	202	57.9933	n.a.	0.00339	n.a.		n.a.	n.a.
	203	58.1067	n.a.	66	n.a.		n.a.	n.a.
	204	58.3367	n.a.	44	n.a.		n.a.	n.a.
	205	58.52	n.a.	0.39699	n.a.		n.a.	n.a.
	206	58.6	n.a.	1.98256	n.a.		n.a.	n.a.
	207	58.7667	n.a.	21.9	n.a.		n.a.	n.a.
	208	58.8467	n.a.	0.14476	n.a.		n.a.	n.a.
	209	58.99	n.a.	22	n.a.		n.a.	n.a.
	210	59.14	n.a.	0.22551	n.a.		n.a.	n.a.
	211	59.24	n.a.	6.2366	n.a.		n.a.	n.a.
	212	59.39	n.a.	0.25154	n.a.		n.a.	n.a.
	213	59.4833	n.a.	3.77971	n.a.		n.a.	n.a.
	214	59.5667	n.a.	0.09293	n.a.		n.a.	n.a.
	215	59.6	n.a.	0.89486	n.a.		n.a.	n.a.
	216	59.7267	n.a.	1.92529	n.a.		n.a.	n.a.
	217	59.8367	n.a.	0.54093	n.a.		n.a.	n.a.
	218	59.9767	n.a.	0.18488	n.a.		n.a.	n.a.
	219	60.04	n.a.	0.03824	n.a.		n.a.	n.a.
	220	60.1333	n.a.	0.17309	n.a.		n.a.	n.a.
	221	60.2467	n.a.	0.03917	n.a.		n.a.	n.a.
	222	60.2933	n.a.	0.37036	n.a.		n.a.	n.a.
	223	60.42	n.a.	0.34168	n.a.		n.a.	n.a.
	224	60.5067	n.a.	0.67513	n.a.		n.a.	n.a.
	225	60.6733	n.a.	1.05183	n.a.		n.a.	n.a.
	226	60.7867	n.a.	0.15533	n.a.		n.a.	n.a.
	227	60.88	n.a.	0.65875	n.a.		n.a.	n.a.
	228	60.9467	n.a.	2.2918	n.a.		n.a.	n.a.
	229	61.0233	n.a.	63.6729	n.a.		n.a.	n.a.
	230	61.1833	n.a.	2.30616	n.a.		n.a.	n.a.
	231	61.2567	n.a.	1.529	n.a.		n.a.	n.a.
	232	61.5567	n.a.	0.06234	n.a.		n.a.	n.a.
	233	61.6833	n.a.	0.32755	n.a.		n.a.	n.a.
	234	61.74	n.a.	0.09772	n.a.		n.a.	n.a.
	235	61.8567	n.a.	10	n.a.		n.a.	n.a.
	236	61.9533	n.a.	0.05772	n.a.		n.a.	n.a.
	237	62.0867	n.a.	0.08002	n.a.		n.a.	n.a.
	238	62.1767	n.a.	0.03346	n.a.		n.a.	n.a.
	239	62.24	n.a.	0.01622	n.a.		n.a.	n.a.
	240	62.3267	n.a.	0.25781	n.a.		n.a.	n.a.
	241	62.3767	n.a.	0.02147	n.a.		n.a.	n.a.
	242	62.5567	n.a.	0.02556	n.a.		n.a.	n.a.
	243	62.6467	n.a.	0.63751	n.a.		n.a.	n.a.
	244	62.74	n.a.	33	n.a.		n.a.	n.a.
	245	62.9533	n.a.	0	n.a.		n.a.	n.a.
	246	63.4	n.a.	0	n.a.		n.a.	n.a.
	247	64.43	n.a.	0.00934	n.a.		n.a.	n.a.
	248	64.6467	n.a.	0.00014	n.a.		n.a.	n.a.
	249	64.88	n.a.	0.0105	n.a.		n.a.	n.a.
	250	64.9567	n.a.	0.00966	n.a.		n.a.	n.a.
	251	65.1	n.a.	0.01277	n.a.		n.a.	n.a.
	252	65.24	n.a.	0.00496	n.a.		n.a.	n.a.
	253	65.4067	n.a.	0.01119	n.a.		n.a.	n.a.
	254	65.93	n.a.	0.00042	n.a.		n.a.	n.a.
	255	66.06	n.a.	0.00312	n.a.		n.a.	n.a.
	256	67.3767	n.a.	0.0053	n.a.		n.a.	n.a.
	257	67.4933	n.a.	0.00856	n.a.		n.a.	n.a.
	258	67.5633	n.a.	0.01337	n.a.		n.a.	n.a.
	259	67.62	n.a.	0.0016	n.a.		n.a.	n.a.
	260	67.6533	n.a.	0.01215	n.a.		n.a.	n.a.
	261	67.7167	n.a.	0.01425	n.a.		n.a.	n.a.
	262	67.7967	n.a.	0.01197	n.a.		n.a.	n.a.
	263	67.8667	n.a.	0.00131	n.a.		n.a.	n.a.
	264	67.96	n.a.	0.00484	n.a.		n.a.	n.a.
	265	68.11	n.a.	0.012	n.a.		n.a.	n.a.
	266	68.2	n.a.	0.00631	n.a.		n.a.	n.a.
	267	68.2867	n.a.	0.00718	n.a.		n.a.	n.a.
	268	68.38	n.a.	0.00343	n.a.		n.a.	n.a.
	269	68.5367	n.a.	0.00681	n.a.		n.a.	n.a.
	270	68.6367	n.a.	0.00527	n.a.		n.a.	n.a.
	271	68.7	n.a.	0.00814	n.a.		n.a.	n.a.
	272	68.7667	n.a.	0.01211	n.a.		n.a.	n.a.
	273	68.8267	n.a.	0.01143	n.a.		n.a.	n.a.
	274	68.8933	n.a.	0.00591	n.a.		n.a.	n.a.
	275	68.9767	n.a.	0.00126	n.a.		n.a.	n.a.
	276	69.05	n.a.	0.00533	n.a.		n.a.	n.a.
	277	69.1333	n.a.	0.01441	n.a.		n.a.	n.a.
	278	69.19	n.a.	0.00953	n.a.		n.a.	n.a.
	279	69.2133	n.a.	0.00937	n.a.		n.a.	n.a.
	280	69.2767	n.a.	0.00338	n.a.		n.a.	n.a.
	281	69.32	n.a.	0.00271	n.a.		n.a.	n.a.
	282	69.35	n.a.	0.00033	n.a.		n.a.	n.a.
	283	69.3933	n.a.	0.00199	n.a.		n.a.	n.a.
	284	69.4433	n.a.	0.00388	n.a.		n.a.	n.a.
	285	69.52	n.a.	0.00065	n.a.		n.a.	n.a.
	286	69.5467	n.a.	0.00262	n.a.		n.a.	n.a.
	287	69.6533	n.a.	0.00413	n.a.		n.a.	n.a.
	288	69.73	n.a.	0.00245	n.a.		n.a.	n.a.
	289	69.84	n.a.	0.00934	n.a.		n.a.	n.a.
	290	69.9067	n.a.	0.00342	n.a.		n.a.	n.a.
	291	69.94	n.a.	0.00401	n.a.		n.a.	n.a.
	Total:			2069.87				n.a.
