# Supplementary material for: Caffeoylquinic acid profiling: comparative analysis in yerba mate, Indian camphorweed, and stevia extracts with emphasis on the influence of brewing conditions and cold storage in yerba mate infusion
Source: PeerJ. 2024 May 6;12:e17250. doi: 10.7717/peerj.17250 (PMC11080990; doi:10.7717/peerj.17250)
Supplement: Supplemental Information 7 [file peerj-12-17250-s007.xlsx]

## Sheet: Sheet1
	Sample Name:		23112020 STD Mix 23 Nov CQA			Injection Volume:		10
	Vial Number:		BB3			Channel:		UV_VIS_1
	Sample Type:		standard			Wavelength:		320.0
	Control Program:		20200611 CQAs 1_5mlmin-1 70min			Bandwidth:		4
	Quantif. Method:		20200611 CQAs 1_5mlmin-1 70min			Dilution Factor:		1
	Recording Time:		2020-11-24 04:12:36			Sample Weight:		1
	Run Time (min):		70			Sample Amount:		1
	No.	Ret.Time	Peak Name	Height	Spectrum Name		Lib.Name	Match
		min		mAU	in Library			with Lib
	1	5.13333	n.a.	19.272	n.a.		n.a.	n.a.
	2	6.10667	1-CQA	139.699	n.a.		n.a.	n.a.
	3	7.39333	3-CQA	94.0131	n.a.		n.a.	n.a.
	4	9.64333	n.a.	0.15578	n.a.		n.a.	n.a.
	5	15.8	n.a.	6.8094	n.a.		n.a.	n.a.
	6	18.8967	5-CQA	88.5554	n.a.		n.a.	n.a.
	7	19.52	4-CQA	52.2557	n.a.		n.a.	n.a.
	8	21.21	n.a.	0.14034	n.a.		n.a.	n.a.
	9	27.5967	n.a.	14.6455	n.a.		n.a.	n.a.
	10	28.5167	puerarin	340.899	n.a.		n.a.	n.a.
	11	29.8133	n.a.	19.0691	n.a.		n.a.	n.a.
	12	30.6333	1,3-diCQA	278.85	n.a.		n.a.	n.a.
	13	31.0833	n.a.	0.59985	n.a.		n.a.	n.a.
	14	31.4167	n.a.	0.43947	n.a.		n.a.	n.a.
	15	31.7233	n.a.	0.90086	n.a.		n.a.	n.a.
	16	32.7567	n.a.	3.79065	n.a.		n.a.	n.a.
	17	33.1167	n.a.	0.36623	n.a.		n.a.	n.a.
	18	33.66	n.a.	0.20023	n.a.		n.a.	n.a.
	19	34.3267	n.a.	0.84531	n.a.		n.a.	n.a.
	20	34.52	n.a.	0.65932	n.a.		n.a.	n.a.
	21	35.2667	n.a.	1.06931	n.a.		n.a.	n.a.
	22	40.54	1,4-diCQA	86.3613	n.a.		n.a.	n.a.
	23	41.4533	3,4-diCQA	183.323	n.a.		n.a.	n.a.
	24	43.9667	1,5-diCQA	83.7241	n.a.		n.a.	n.a.
	25	45.75	3,5-diCQA	182.082	n.a.		n.a.	n.a.
	26	48.9033	n.a.	0.16123	n.a.		n.a.	n.a.
	27	52.59	n.a.	0.36854	n.a.		n.a.	n.a.
	28	54.03	4,5-diCQA	127.056	n.a.		n.a.	n.a.
	Total:			1726.31				n.a.
					Library:	n.a.
					Component:	n.a.
					Match Factor:	n.a.
					Ret.Time:	n.a.
					Ret.Index:	n.a.
					Origin:	n.a.
					Acq.Date:	n.a.
					Program:	n.a.
					Solvents:	n.a.
					Comment:	n.a.
					Library:	n.a.
					Component:	n.a.
					Match Factor:	n.a.
					Ret.Time:	n.a.
					Ret.Index:	n.a.
					Origin:	n.a.
					Acq.Date:	n.a.
					Program:	n.a.
					Solvents:	n.a.
					Comment:	n.a.
					Library:	n.a.
					Component:	n.a.
					Match Factor:	n.a.
					Ret.Time:	n.a.
					Ret.Index:	n.a.
					Origin:	n.a.
					Acq.Date:	n.a.
					Program:	n.a.
					Solvents:	n.a.
					Comment:	n.a.
					Library:	n.a.
					Component:	n.a.
					Match Factor:	n.a.
					Ret.Time:	n.a.
					Ret.Index:	n.a.
					Origin:	n.a.
					Acq.Date:	n.a.
					Program:	n.a.
					Solvents:	n.a.
					Comment:	n.a.
					Library:	n.a.
					Component:	n.a.
					Match Factor:	n.a.
					Ret.Time:	n.a.
					Ret.Index:	n.a.
					Origin:	n.a.
					Acq.Date:	n.a.
					Program:	n.a.
					Solvents:	n.a.
					Comment:	n.a.
					Library:	n.a.
					Component:	n.a.
					Match Factor:	n.a.
					Ret.Time:	n.a.
					Ret.Index:	n.a.
					Origin:	n.a.
					Acq.Date:	n.a.
					Program:	n.a.
					Solvents:	n.a.
					Comment:	n.a.
					Library:	n.a.
					Component:	n.a.
					Match Factor:	n.a.
					Ret.Time:	n.a.
					Ret.Index:	n.a.
					Origin:	n.a.
					Acq.Date:	n.a.
					Program:	n.a.
					Solvents:	n.a.
					Comment:	n.a.
					Library:	n.a.
					Component:	n.a.
					Match Factor:	n.a.
					Ret.Time:	n.a.
					Ret.Index:	n.a.
					Origin:	n.a.
					Acq.Date:	n.a.
					Program:	n.a.
					Solvents:	n.a.
					Comment:	n.a.
					Library:	n.a.
					Component:	n.a.
					Match Factor:	n.a.
					Ret.Time:	n.a.
					Ret.Index:	n.a.
					Origin:	n.a.
					Acq.Date:	n.a.
					Program:	n.a.
					Solvents:	n.a.
					Comment:	n.a.
					Library:	n.a.
					Component:	n.a.
					Match Factor:	n.a.
					Ret.Time:	n.a.
					Ret.Index:	n.a.
					Origin:	n.a.
					Acq.Date:	n.a.
					Program:	n.a.
					Solvents:	n.a.
					Comment:	n.a.
					Library:	n.a.
					Component:	n.a.
					Match Factor:	n.a.
					Ret.Time:	n.a.
					Ret.Index:	n.a.
					Origin:	n.a.
					Acq.Date:	n.a.
					Program:	n.a.
					Solvents:	n.a.
					Comment:	n.a.
					Library:	n.a.
					Component:	n.a.
					Match Factor:	n.a.
					Ret.Time:	n.a.
					Ret.Index:	n.a.
					Origin:	n.a.
					Acq.Date:	n.a.
					Program:	n.a.
					Solvents:	n.a.
					Comment:	n.a.
					Library:	n.a.
					Component:	n.a.
					Match Factor:	n.a.
					Ret.Time:	n.a.
					Ret.Index:	n.a.
					Origin:	n.a.
					Acq.Date:	n.a.
					Program:	n.a.
					Solvents:	n.a.
					Comment:	n.a.
					Library:	n.a.
					Component:	n.a.
					Match Factor:	n.a.
					Ret.Time:	n.a.
					Ret.Index:	n.a.
					Origin:	n.a.
					Acq.Date:	n.a.
					Program:	n.a.
					Solvents:	n.a.
					Comment:	n.a.
					Library:	n.a.
					Component:	n.a.
					Match Factor:	n.a.
					Ret.Time:	n.a.
					Ret.Index:	n.a.
					Origin:	n.a.
					Acq.Date:	n.a.
					Program:	n.a.
					Solvents:	n.a.
					Comment:	n.a.
					Library:	n.a.
					Component:	n.a.
					Match Factor:	n.a.
					Ret.Time:	n.a.
					Ret.Index:	n.a.
					Origin:	n.a.
					Acq.Date:	n.a.
					Program:	n.a.
					Solvents:	n.a.
					Comment:	n.a.

## Sheet: Standard curve 1-CQA
Area	Concentration (microgram/mL)
2.12	0
11.09	66
37.29	200
69.11	400
2.8	20
2.3	5
90.44	600
5.6	40
X	Y
SE	4.94502
LOD	4.52038
LOQ	13.6981
	SUMMARY OUTPUT
	Regression Statistics
	Multiple R	0.999423						SUMMARY OUTPUT
	R Square	0.998846
	Adjusted R Square	0.998615						Regression Statistics
	Standard Error	6.84383						Multiple R	0.999287
	Observations	7						R Square	0.998575
								Adjusted R Square	0.998289
	ANOVA							Standard Error	7.67391
		df	SS	MS	F	Significance F		Observations	7
	Regression	1	202700	202700	4327.67	1.53671e-08
	Residual	5	234.19	46.8381				ANOVA
	Total	6	202934						df	SS	MS	F	Significance F
								Regression	1	206271	206271	3502.72	2.60593e-08
		Coefficients	Standard Error	t Stat	P-value	Lower 95%	Upper 95%	Residual	5	294.445	58.8889
	Intercept	1.71477	4.41013	0.388825	0.713412	-9.62182	13.0514	Total	6	206566
	X Variable 1	3.5866	0.0545201	65.785	1.53671e-08	3.44646	3.72675
									Coefficients	Standard Error	t Stat	P-value	Lower 95%	Upper 95%	Lower 95.0%	Upper 95.0%
								Intercept	-1.46351	4.94502	-0.295956	0.779161	-14.1751	11.2481	-14.1751	11.2481
								X Variable 1	3.61806	0.0611327	59.1838	2.60593e-08	3.46092	3.77521	3.46092	3.77521

## Sheet: Standard curve 3-CQA
Area	Concentration (microgram/mL)
2.12	0
9.54	90
23.56	220
54.99	500
80.88	800
112.33	999
67.99	666
4.12	40
X	Y
SE	8.76057
LOD	6.3474
LOQ	19.2345
	SUMMARY OUTPUT
	Regression Statistics															SUMMARY OUTPUT
	Multiple R	0.99672
	R Square	0.993451														Regression Statistics
	Adjusted R Square	0.992141														Multiple R	0.99686
	Standard Error	16.3856														R Square	0.993729
	Observations	7														Adjusted R Square	0.992684
																Standard Error	16.1517
	ANOVA															Observations	8
		df	SS	MS	F	Significance F
	Regression	1	203638	203638	758.465	1.18127e-06										ANOVA
	Residual	5	1342.44	268.487													df	SS	MS	F	Significance F
	Total	6	204981													Regression	1	248037	248037	950.775	7.725e-08
																Residual	6	1565.27	260.879
		Coefficients	Standard Error	t Stat	P-value	Lower 95%	Upper 95%	Lower 95.0%	Upper 95.0%							Total	7	249602
	Intercept	8.87735	10.3576	0.857082	0.430553	-17.7478	35.5025	-17.7478	35.5025
	X Variable 1	4.55463	0.165381	27.5402	1.18127e-06	4.12951	4.97976	4.12951	4.97976								Coefficients	Standard Error	t Stat	P-value	Lower 95%	Upper 95%	Lower 95.0%	Upper 95.0%
																Intercept	4.49883	8.76057	0.513532	0.625935	-16.9375	25.9352	-16.9375	25.9352
																X Variable 1	4.60954	0.149492	30.8346	7.725e-08	4.24374	4.97533	4.24374	4.97533

## Sheet: Standard curve 4-CQA
Area	Concentration (microgram/mL)
2.12	0
10	90
25	200
47.22	400
75.1	800
104.88	1000
60.22	600
3.64	50
X	Y
SE	10.3354
LOD	6.93231
LOQ	21.007
	SUMMARY OUTPUT
	Regression Statistics
	Multiple R	0.995534
	R Square	0.991089
	Adjusted R Square	0.989306
	Standard Error	19.0991													SUMMARY OUTPUT
	Observations	7
															Regression Statistics
	ANOVA														Multiple R	0.995606
		df	SS	MS	F	Significance F									R Square	0.991231
	Regression	1	202846	202846	556.084	2.55342e-06									Adjusted R Square	0.989769
	Residual	5	1823.88	364.776											Standard Error	19.0916
	Total	6	204670												Observations	8
		Coefficients	Standard Error	t Stat	P-value	Lower 95%	Upper 95%	Lower 95.0%	Upper 95.0%						ANOVA
	Intercept	11.9017	11.9935	0.992354	0.36659	-18.9284	42.7319	-18.9284	42.7319							df	SS	MS	F	Significance F
	X Variable 1	4.91998	0.208638	23.5814	2.55342e-06	4.38366	5.45631	4.38366	5.45631						Regression	1	247198	247198	678.205	2.11435e-07
															Residual	6	2186.93	364.489
															Total	7	249385
																Coefficients	Standard Error	t Stat	P-value	Lower 95%	Upper 95%	Lower 95.0%	Upper 95.0%
															Intercept	5.72895	10.3354	0.554301	0.599409	-19.561	31.0189	-19.561	31.0189
															X Variable 1	5.00383	0.192142	26.0424	2.11435e-07	4.53368	5.47399	4.53368	5.47399

## Sheet: Standard curve 5-CQA
Area	Concentration (microgram/mL)
2.12	0
22	100
100	230
200	400
400	800
500	1000
340	600
20	50
600	1200
700	1500
SE	6.25853
LOD	10.5373
LOQ	31.9313
	SUMMARY OUTPUT
	Regression Statistics
	Multiple R	0.998254														SUMMARY OUTPUT
	R Square	0.996512
	Adjusted R Square	0.995814														Regression Statistics
	Standard Error	11.9604														Multiple R	0.998426
	Observations	7														R Square	0.996854
																Adjusted R Square	0.996329
	ANOVA															Standard Error	11.4422
		df	SS	MS	F	Significance F										Observations	8
	Regression	1	204321	204321	1428.3	2.44345e-07
	Residual	5	715.259	143.052												ANOVA
	Total	6	205036														df	SS	MS	F	Significance F
																Regression	1	248874	248874	1900.92	9.74586e-09
		Coefficients	Standard Error	t Stat	P-value	Lower 95%	Upper 95%	Lower 95.0%	Upper 95.0%							Residual	6	785.539	130.923
	Intercept	5.27649	7.62895	0.691639	0.519959	-14.3344	24.8873	-14.3344	24.8873							Total	7	249660
	X Variable 1	1.96567	0.0520116	37.7929	2.44345e-07	1.83197	2.09937	1.83197	2.09937
																	Coefficients	Standard Error	t Stat	P-value	Lower 95%	Upper 95%	Lower 95.0%	Upper 95.0%
																Intercept	1.15523	6.25853	0.184584	0.859636	-14.1588	16.4693	-14.1588	16.4693
																X Variable 1	1.98801	0.0455972	43.5995	9.74586e-09	1.87644	2.09959	1.87644	2.09959

## Sheet: Standard curve 1,3-diCQA
Area	Concentration (microgram/mL)
2.12	0
19.67	100
48.6	240
100	500
160	778
215	1000
129.86	600
7.87	50
X	Y
SE	6.65401
LOD	9.26507
LOQ	28.076
	SUMMARY OUTPUT
																	SUMMARY OUTPUT
	Regression Statistics
	Multiple R	0.99807															Regression Statistics
	R Square	0.996144															Multiple R	0.998189
	Adjusted R Square	0.995373															R Square	0.99638
	Standard Error	12.5774															Adjusted R Square	0.995777
	Observations	7															Standard Error	12.2741
																	Observations	8
	ANOVA
		df	SS	MS	F	Significance F											ANOVA
	Regression	1	204329	204329	1291.66	3.13931e-07												df	SS	MS	F	Significance F
	Residual	5	790.954	158.191													Regression	1	248819	248819	1651.6	1.48407e-08
	Total	6	205120														Residual	6	903.92	150.653
																	Total	7	249723
		Coefficients	Standard Error	t Stat	P-value	Lower 95%	Upper 95%	Lower 95.0%	Upper 95.0%
	Intercept	7.73493	7.9662	0.970969	0.376158	-12.7428	28.2127	-12.7428	28.2127									Coefficients	Standard Error	t Stat	P-value	Lower 95%	Upper 95%	Lower 95.0%	Upper 95.0%
	X Variable 1	2.37824	0.066173	35.9397	3.13931e-07	2.20814	2.54834	2.20814	2.54834								Intercept	4.31478	6.65401	0.648449	0.540702	-11.967	20.5965	-11.967	20.5965
																	X Variable 1	2.40071	0.0590727	40.6399	1.48407e-08	2.25616	2.54525	2.25616	2.54525

## Sheet: Standard curve 1,5-diCQA
Area	Concentration (microgram/mL)
2.12	0
22	100
44	300
98	500
169	800
198	1000
138	600
8.36	50
X	Y
SE	5.77278
LOD	7.77559
LOQ	23.5624
	SUMMARY OUTPUT
	Regression Statistics
	Multiple R	0.998666
	R Square	0.997334
	Adjusted R Square	0.996889
	Standard Error	10.5208
	Observations	8
	ANOVA
		df	SS	MS	F	Significance F
	Regression	1	248424	248424	2244.39	5.92876e-09
	Residual	6	664.12	110.687
	Total	7	249089
		Coefficients	Standard Error	t Stat	P-value	Lower 95%	Upper 95%	Lower 95.0%	Upper 95.0%
	Intercept	0.638032	5.77278	0.110524	0.915598	-13.4875	14.7635	-13.4875	14.7635
	X Variable 1	2.45561	0.0518335	47.375	5.92876e-09	2.32878	2.58244	2.32878	2.58244

## Sheet: Standard curve 3,4-diCQA
Area	Concentration (microgram/mL)
2.12	0
37	100
83.9	260
166.61	500
270	800
333.22	900
228	600
16	40
X	Y
SE	2.47567
LOD	5.4501
LOQ	16.5154
	SUMMARY OUTPUT
	Regression Statistics
	Multiple R	0.99976
	R Square	0.99952
	Adjusted R Square	0.99944
	Standard Error	4.46615
	Observations	8
	ANOVA
		df	SS	MS	F	Significance F
	Regression	1	249198	249198	12493.4	3.45716e-11
	Residual	6	119.679	19.9465
	Total	7	249318
		Coefficients	Standard Error	t Stat	P-value	Lower 95%	Upper 95%	Lower 95.0%	Upper 95.0%
	Intercept	-3.51197	2.47567	-1.4186	0.205809	-9.56971	2.54576	-9.56971	2.54576
	X Variable 1	1.49974	0.0134176	111.774	3.45716e-11	1.46691	1.53257	1.46691	1.53257

## Sheet: Standard curve 3,5-diCQA
Area	Concentration (microgram/mL)
2.12	0
48	100
108.9	250
215.55	500
344.89	700
439	1000
320	650
17.24	50
600	1200
700	1500
X	Y
SE	5.7
LOD	16.7946
LOQ	50.8929
		SUMMARY OUTPUT
		Regression Statistics
		Multiple R	0.997609
		R Square	0.995225
		Adjusted R Square	0.994429
		Standard Error	14.0846
		Observations	8
		ANOVA
			df	SS	MS	F	Significance F
		Regression	1	248059	248059	1250.45	3.40918e-08
		Residual	6	1190.26	198.376
		Total	7	249249
			Coefficients	Standard Error	t Stat	P-value	Lower 95%	Upper 95%	Lower 95.0%	Upper 95.0%
		Intercept	-1.01601	7.76481	-0.130848	0.900172	-20.0158	17.9838	-20.0158	17.9838
		X Variable 1	1.12684	0.0318662	35.3617	3.40918e-08	1.04887	1.20482	1.04887	1.20482

## Sheet: Standard curve 4,5-diCQA
Area	Concentration (microgram/mL)
2.12	0
40	100
94.06	200
189	500
300	800
371.89	1000
255	600
14.87	40
X	Y
SE	2.46381
LOD	6.11321
LOQ	18.5249
		SUMMARY OUTPUT
		Regression Statistics
		Multiple R	0.999761
		R Square	0.999521
		Adjusted R Square	0.999442
		Standard Error	4.45884
		Observations	8
		ANOVA
			df	SS	MS	F	Significance F
		Regression	1	249104	249104	12529.6	3.42728e-11
		Residual	6	119.287	19.8812
		Total	7	249223
			Coefficients	Standard Error	t Stat	P-value	Lower 95%	Upper 95%	Lower 95.0%	Upper 95.0%
		Intercept	-2.26479	2.46381	-0.919222	0.393433	-8.29352	3.76394	-8.29352	3.76394
		X Variable 1	1.33832	0.0119561	111.936	3.42728e-11	1.30906	1.36757	1.30906	1.36757
