# Supplementary material for: Caffeoylquinic acid profiling: comparative analysis in yerba mate, Indian camphorweed, and stevia extracts with emphasis on the influence of brewing conditions and cold storage in yerba mate infusion
Source: PeerJ. 2024 May 6;12:e17250. doi: 10.7717/peerj.17250 (PMC11080990; doi:10.7717/peerj.17250)
Supplement: Supplemental Information 8 [file peerj-12-17250-s008.xlsx]

## Sheet: color
Day	sample	rep	color measuring
			L*	a*	b*
0		1	25.46	2.18	2.8
		2	25.27	2.21	2.82
		3	24.91	2.2	2.78
		Average	25.2133	2.19667	2.8
1	Dark	1	33.61	3.45	5.8
		2	33.65	3.68	5.51
		3	34.12	3.52	5.65
		Average	33.7933	3.55	5.65333
	light	1	34.51	3.75	4.08
		2	34.47	3.83	4.01
		3	33.99	3.66	4.78
		Average	34.3233	3.74667	4.29
3	Dark	1	26.63	3.52	4.87
		2	27.11	4.17	5.78
		3	26.6	3.7	5.16
		Average	26.78	3.79667	5.27
	light	1	26.65	3.53	5.52
		2	27.62	4.05	6.32
		3	27.09	3.65	5.5
		Average	27.12	3.74333	5.78
5	Dark	1	26.84	4.05	5.18
		2	26.36	4.36	7.05
		3	27.88	4.96	6.57
		Average	27.0267	4.45667	6.26667
	light	1	26.65	3.33	5.17
		2	27.66	4.12	7.16
		3	27.58	4.92	7.75
		Average	27.2967	4.12333	6.69333
7	Dark	1	27.18	4.13	4.76
		2	26.9	3.9	3.66
		3	26.63	3.89	3.61
		Average	26.9033	3.97333	4.01
	light	1	27.7	4.35	5.03
		2	27.56	4.35	5.53
		3	28.16	4.49	6.2
		Average	27.8067	4.39667	5.58667
10	Dark	1	25.26	4.44	5.85
		2	26.13	4.17	4.85
		3	26.94	4.85	6.39
		Average	26.11	4.48667	5.69667
	light	1	27.82	4.47	6.42
		2	27.06	5.33	8.3
		3	26.68	4.36	6.69
		Average	27.1867	4.72	7.13667

## Sheet: PDA
total viable count
Day	sample	dilution
				cfu/ml	log cfu/ml
0		0	55	550	2.74036
			42	420	2.62325
			63	630	2.79934
		-1	7
			3
			6
		mean			2.72098
		S.D.			0.0731832
Day	sample	dilution
				cfu/ml	log cfu/ml
1	Dark	0	8
			16
			10
		-1	0
			0
			0
		mean
		S.D.
	light	0	7
			13
			9
		-1	0
			0
			0
		mean
		S.D.
Day	sample	dilution
				cfu/ml	log cfu/ml
3	Dark	0	6
			13
			10
		-1	0
			0
			0
		mean
		S.D.
	light	0	12
			7
			5
		-1	0
			0
			0
		mean
		S.D.
Day	sample	dilution
				cfu/ml	log cfu/ml
5	Dark	0	11
			9
			8
		-1	0
			0
			0
		mean
		S.D.
	light	0	10
			8
			8
		-1	0
			0
			0
		mean
		S.D.
Day	sample	dilution
				cfu/ml	log cfu/ml
7	Dark	0	15
			4
			7
		-1	0
			0
			0
		mean
		S.D.
	light	0	9
			7
			6
		-1	0
			0
			0
		mean
		S.D.
Day	sample	dilution
				cfu/ml	log cfu/ml
10	Dark	0	4
			10
			2
		-1	0
			0
			0
		mean
		S.D.
	light	0	3
			7
			13
		-1	0
			0
			0
		mean
		S.D.

## Sheet: PCA
yeast & mold
Day	sample	dilution
				cfu/ml	log cfu/ml
0		0	32	320	2.50515
			42	420	2.62325
			30	300	2.47712
		-1	6
			1
			6
		mean			2.53517
		S.D.			0.0633215
Day	sample	dilution
				cfu/ml	log cfu/ml
1	Dark	0	12
			13
			9
		-1	0
			0
			0
		mean
		S.D.
	light	0	6
			11
			10
		-1	0
			0
			0
		mean
		S.D.
Day	sample	dilution
				cfu/ml	log cfu/ml
3	Dark	0	7
			4
			2
		-1	0
			0
			0
		mean
		S.D.
	light	0	9
			12
			10
		-1	0
			0
			0
		mean
		S.D.
Day	sample	dilution
				cfu/ml	log cfu/ml
5	Dark	0	6
			4
			9
		-1	0
			0
			0
		mean
		S.D.
	light	0	7
			7
			6
		-1	0
			0
			0
		mean
		S.D.
Day	sample	dilution
				cfu/ml	log cfu/ml
7	Dark	0	14
			8
			11
		-1	0
			0
			0
		mean
		S.D.
	light	0	3
			5
			9
		-1	0
			0
			0
		mean
		S.D.
Day	sample	dilution
				cfu/ml	log cfu/ml
10	Dark	0	2
			15
			11
		-1	0
			0
			0
		mean
		S.D.
	light	0	8
			11
			13
		-1	0
			0
			0
		mean
		S.D.
